# Supplementary material for: A Metagenomic Framework for the Study of Airborne Microbial Communities
Source: PubMed Central journal article supplement (PMC3859506; doi:10.1371/journal.pone.0081862), 2013-12-11
Supplement: pone.0081862.s001.pdf [file pone.0081862.s001.pdf]

Sampling Buffer: ~10 ml antimicrobial cocktail

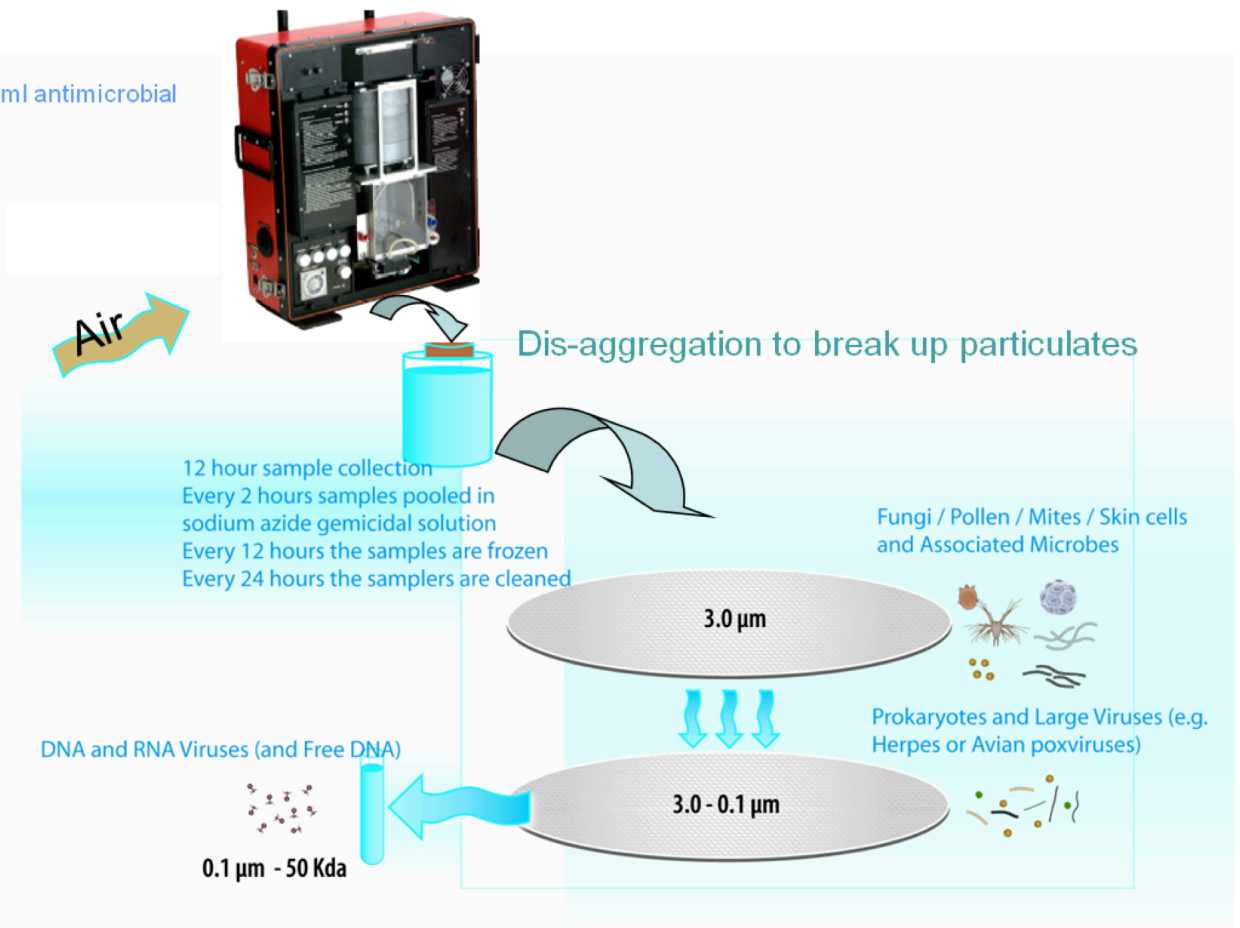

Figure S1: Sampling of airborne microorganisms.
