# Supplementary material for: A Metagenomic Framework for the Study of Airborne Microbial Communities
Source: PubMed Central journal article supplement (PMC3859506; doi:10.1371/journal.pone.0081862), 2013-12-11
Supplement: pone.0081862.s002.pdf [file pone.0081862.s002.pdf]

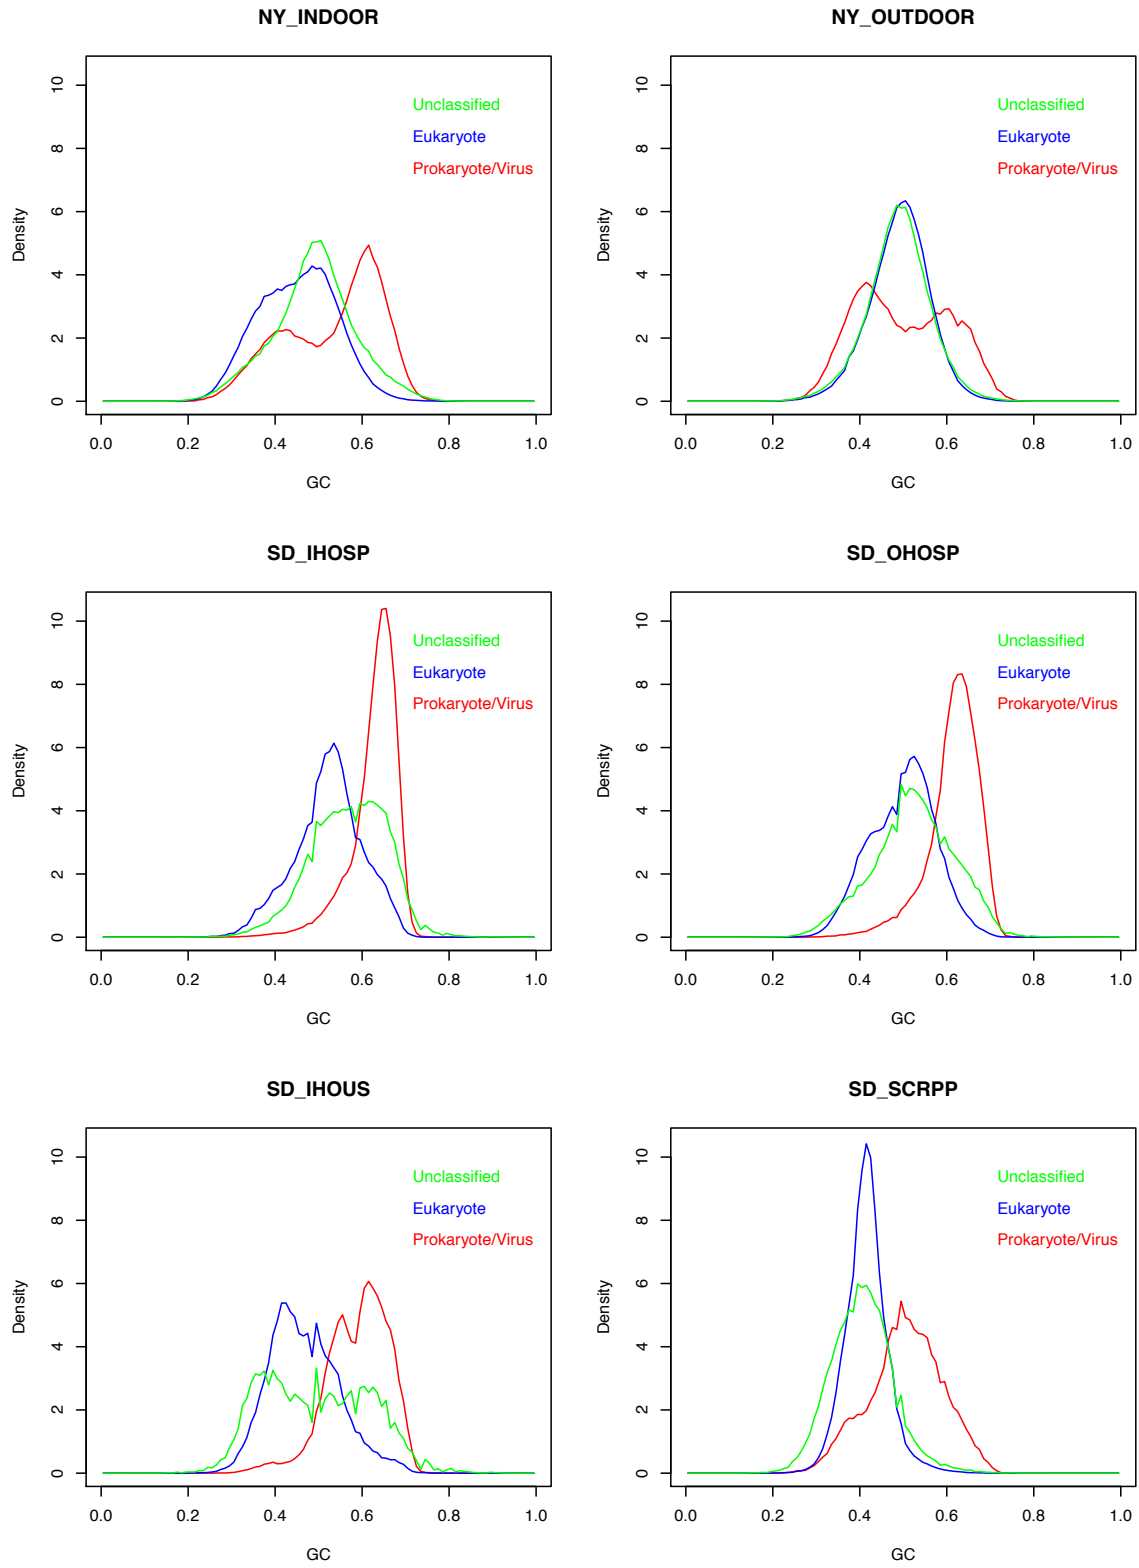

**Figure S2: GC composition profile for the unclassified group (U), eukaryotic group (E), and prokaryotic/viral group (PV).**
