# Supplementary material for: A Metagenomic Framework for the Study of Airborne Microbial Communities
Source: PubMed Central journal article supplement (PMC3859506; doi:10.1371/journal.pone.0081862), 2013-12-11
Supplement: pone.0081862.s004.pdf [file pone.0081862.s004.pdf]

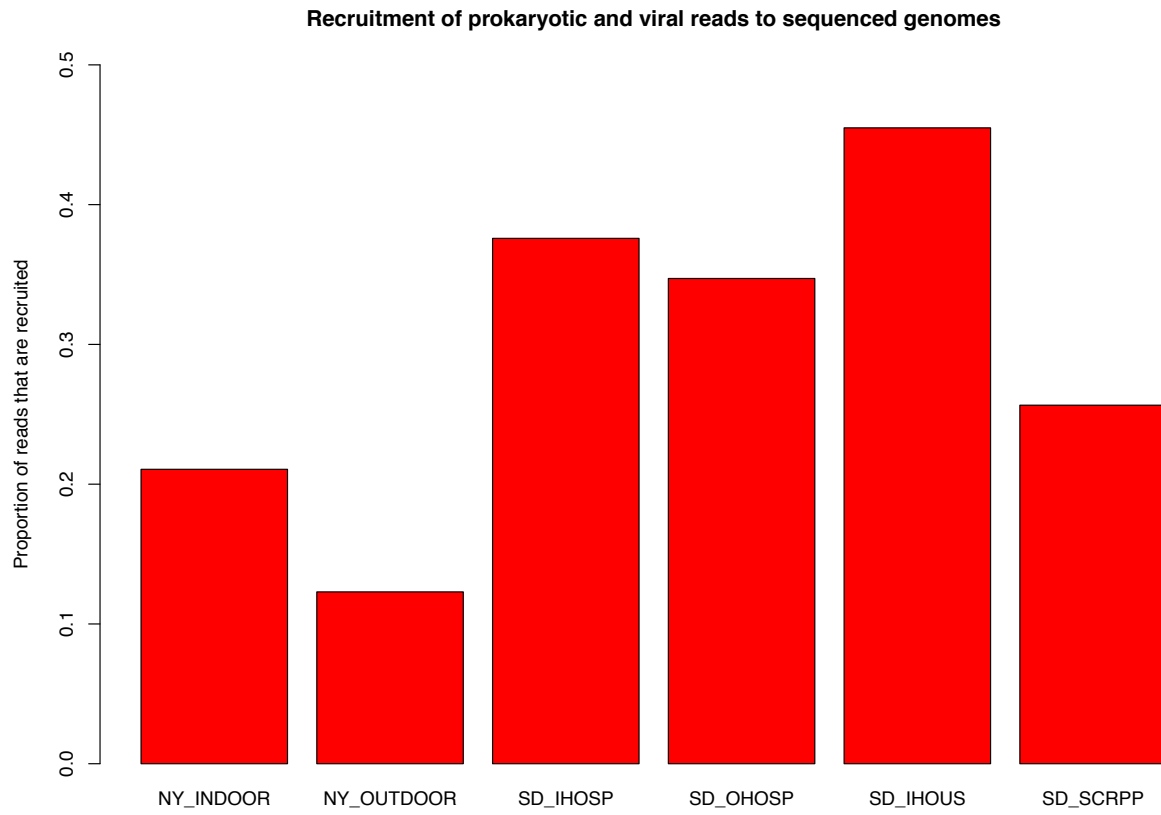

**Figure S4: Proportion of prokaryotic and viral reads recruited to sequenced genomes.**
