# Supplementary material for: A Metagenomic Framework for the Study of Airborne Microbial Communities
Source: PubMed Central journal article supplement (PMC3859506; doi:10.1371/journal.pone.0081862), 2013-12-11
Supplement: pone.0081862.s005.pdf [file pone.0081862.s005.pdf]

**Table S1. Metadata associated with sample collection locations.**

| <b>Location</b>                               | <b>Sampling dates</b> | <b>Sample</b>          | <b>Avg. temp.</b> | <b>Avg. Rel. Humidity</b> | <b>Prevail Wind Speed</b> | <b>Prevail. Wind Direction</b> | <b>Comments</b>                        |
|-----------------------------------------------|-----------------------|------------------------|-------------------|---------------------------|---------------------------|--------------------------------|----------------------------------------|
| NYC Building<br>(near 40.761N, 73.983W)       | 10 - 16 NOV<br>2007   | NY INDOOR              | 19.5 °C           | 40%                       | N/A                       | N/A                            | Light rain on 13 and 15 of November    |
|                                               |                       | NY OUTDOOR             | 8.3 °C            | 58%                       | 2.4 m/s                   | WNW                            | Light rain on 13 and 15 of November    |
| SD House<br>(near 32.801N, 117.077W )         | 5 - 7 JUN<br>2010     | SD INDOOR<br>HOUSE     | 22 °C             | 53%                       | N/A                       | N/A                            | Clear, no rain                         |
| SD Medical Center<br>(near 32.753N, 117.163W) | 8 - 21 JUN<br>2010    | SD INDOOR<br>HOSPITAL  | 21.5 °C           | 44%                       | N/A                       | N/A                            | Morning cloud cover, no rain           |
|                                               |                       | SD OUTDOOR<br>HOSPITAL | 18.5 °C           | 74%                       | 3.2 m/s                   | W                              | Morning cloud cover, no rain           |
| SD Pier<br>(at 32.867N, 117.257W)             | 5 - 10 JUL<br>2010    | SD PIER                | 17.5 °C           | 89%                       | 2.8 m/s                   | WNW                            | Low cloud cover all five days, no rain |
