# Supplementary material for: A Metagenomic Framework for the Study of Airborne Microbial Communities
Source: PubMed Central journal article supplement (PMC3859506; doi:10.1371/journal.pone.0081862), 2013-12-11
Supplement: pone.0081862.s006.pdf [file pone.0081862.s006.pdf]

**Table S2. Quality filtering of metagenomic sequence data.**

|                                                  | <b>NY_INDOOR</b> | <b>NY_OUTDOOR</b> | <b>SD_IHOSP</b> | <b>SD_OHOSP</b> | <b>SD_IHOUS</b> | <b>SD_SCRPP</b> |
|--------------------------------------------------|------------------|-------------------|-----------------|-----------------|-----------------|-----------------|
| Initial Number of Reads                          | 3227901          | 3181781           | 1495317         | 1411042         | 1853228         | 1583257         |
| Post Artificial Replicate Filtering              | 2567243          | 2108534           | 628593          | 849437          | 456286          | 1264338         |
| Post Low Complexity Filtering and Repeat Masking | 1598261          | 1197407           | 593912          | 842254          | 416728          | 1256113         |
| Post Chimera Detection                           | 1433678          | 961978            | 577706          | 824114          | 391761          | 1153702         |
