# Supplementary material for: A Metagenomic Framework for the Study of Airborne Microbial Communities
Source: PubMed Central journal article supplement (PMC3859506; doi:10.1371/journal.pone.0081862), 2013-12-11
Supplement: pone.0081862.s008.pdf [file pone.0081862.s008.pdf]

**Table S4. Newbler assembly statistics for the samples. Individual assemblies at two different minimum nucleotide identity thresholds (96% and 86%) were computed.**

|                            | <b>NY_INDOOR</b> | <b>NY_OUTDOOR</b> | <b>SD_IHOSP</b> | <b>SD_OHOSP</b> | <b>SD_IHOUS</b> | <b>SD_SCRPP</b> |
|----------------------------|------------------|-------------------|-----------------|-----------------|-----------------|-----------------|
| <b>Input Reads</b>         | 1,433,624        | 961,778           | 577,705         | 824,114         | 391,761         | 1,153,701       |
| <b>Input Bases</b>         | 502,582,263      | 293,707,031       | 203,995,362     | 242,186,832     | 123,622,093     | 336,367,571     |
| <b>Assembled Reads</b>     | 101,165          | 134,720           | 376,915         | 237,068         | 195,626         | 229,096         |
| <b>Assembled Bases</b>     | 24,808,957       | 28,987,750        | 139,152,571     | 78,456,095      | 70,184,338      | 69,211,834      |
| <b>%Assembled Reads</b>    | 7.06%            | 14.01%            | 65.24%          | 28.77%          | 49.94%          | 19.86%          |
| <b>%Assembled Bases</b>    | 4.94%            | 9.87%             | 68.21%          | 32.39%          | 56.77%          | 20.58%          |
| <b>#contigs</b>            | 9119             | 10573             | 24,697          | 21,424          | 14,383          | 28,282          |
| <b>Average Contig size</b> | 854              | 791               | 808             | 646             | 685             | 789             |
| <b>N50 Contig size</b>     | 869              | 765               | 722             | 589             | 642             | 740             |
| <b>#contigs &gt;500 bp</b> | 4283             | 4070              | 12,884          | 11,312          | 7,902           | 11,130          |
| <b>Largest Contig size</b> | 5471             | 3699              | 42,057          | 6,830           | 11,323          | 8,678           |

(A) 96% identity threshold

|                            | <b>NY_INDOOR</b> | <b>NY_OUTDOOR</b> | <b>SD_IHOSP</b> | <b>SD_OHOSP</b> | <b>SD_IHOUS</b> | <b>SD_SCRPP</b> |
|----------------------------|------------------|-------------------|-----------------|-----------------|-----------------|-----------------|
| <b>Input Reads</b>         | 1,433,624        | 961,778           | 577,705         | 824,114         | 391,761         | 1,153,701       |
| <b>Input Bases</b>         | 502,582,263      | 293,707,031       | 203,995,362     | 242,186,832     | 123,622,093     | 336,367,571     |
| <b>Assembled Reads</b>     | 122,561          | 164,179           | 379,767         | 247,730         | 200,480         | 242,346         |
| <b>Assembled Bases</b>     | 29,327,426       | 35,836,449        | 139,649,082     | 81,066,905      | 71,300,383      | 72,400,290      |
| <b>%Assembled Reads</b>    | 8.55%            | 17.07%            | 65.74%          | 30.06%          | 51.17%          | 21.01%          |
| <b>%Assembled Bases</b>    | 5.84%            | 12.20%            | 68.46%          | 33.47%          | 57.68%          | 21.52%          |
| <b>#contigs</b>            | 11227            | 13674             | 25,062          | 24,078          | 15,107          | 31,701          |
| <b>Average Contig size</b> | 856              | 799               | 808             | 658             | 701             | 793             |
| <b>N50 Contig size</b>     | 874              | 784               | 725             | 601             | 659             | 744             |
| <b>#contigs &gt;500 bp</b> | 5252             | 5631              | 13,018          | 12,359          | 8,238           | 12,059          |
| <b>Largest Contig size</b> | 5645             | 4058              | 42,057          | 6,832           | 11,323          | 8,593           |

(B) 86% identity threshold
