# Supplementary material for: A Metagenomic Framework for the Study of Airborne Microbial Communities
Source: PubMed Central journal article supplement (PMC3859506; doi:10.1371/journal.pone.0081862), 2013-12-11
Supplement: pone.0081862.s009.pdf [file pone.0081862.s009.pdf]

**Table S5. Protein predictions on reads from prokaryotic, viral, and unclassified groups.**

|            | <b>#reads</b> | <b>#peptides on non-euk reads</b> | <b>#peptides that have functional assignment or are conserved hypotheticals</b> |
|------------|---------------|-----------------------------------|---------------------------------------------------------------------------------|
| NY_INDOOR  | 1433678       | 760301                            | 298657                                                                          |
| NY_OUTDOOR | 961978        | 583993                            | 81774                                                                           |
| SD_IHOSP   | 577706        | 577849                            | 410781                                                                          |
| SD_OHOSP   | 824114        | 672975                            | 356118                                                                          |
| SD_IHOUS   | 391761        | 359701                            | 238543                                                                          |
| SD_SCRPP   | 1153702       | 822339                            | 317785                                                                          |
