# Supplementary material for: A Metagenomic Framework for the Study of Airborne Microbial Communities
Source: PLoS One. 2013 Dec 11;8(12):e81862. doi: 10.1371/journal.pone.0081862 (PMC3859506; doi:10.1371/journal.pone.0081862)
Supplement: Table S6 — Abundances of KEGG and COG protein groups in the samples. (XLSX) [file pone.0081862.s010.xlsx]

## Sheet: KEGG functional categories
	NY_INDOOR	NY_OUTDOOR	SD_IHOSP	SD_OHOSP	SD_IHOUS	SD_SCRPP
Cellular Processes; Cell growth and death	0.0114017	0.0141275	0.0129216	0.0105653	0.0280287	0.012962
Cellular Processes; Cell motility	0.0139799	0.0112907	0.0227292	0.0286479	0.0208388	0.00927134
Cellular Processes; Transport and catabolism	0.00528347	0.00497284	0.00585783	0.00451667	0.00396583	0.00677115
Environmental Information Processing; Membrane transport	0.106882	0.0768161	0.0987697	0.101643	0.125909	0.0525956
Environmental Information Processing; Signal transduction	0.0451518	0.0484816	0.0501853	0.0542617	0.0547809	0.0323054
Genetic Information Processing; Folding, sorting and degradation	0.024478	0.0264178	0.0205844	0.0262887	0.018341	0.0298934
Genetic Information Processing; Replication and repair	0.0372252	0.0456088	0.0306266	0.030222	0.043254	0.0326825
Genetic Information Processing; Transcription	0.00221033	0.00179869	0.00358976	0.00369758	0.00191885	0.00564422
Genetic Information Processing; Translation	0.0500851	0.0508909	0.0556881	0.0552728	0.0421133	0.0805052
Metabolism; Amino acid metabolism	0.138013	0.134769	0.143938	0.13997	0.135039	0.138613
Metabolism; Biosynthesis of other secondary metabolites	0.0138159	0.0172382	0.0125468	0.0135355	0.0147067	0.0112483
Metabolism; Carbohydrate metabolism	0.131809	0.131505	0.133058	0.125711	0.130645	0.127848
Metabolism; Energy metabolism	0.0893687	0.100585	0.100232	0.0984483	0.0849362	0.114893
Metabolism; Glycan biosynthesis and metabolism	0.0240659	0.032735	0.0203573	0.0167353	0.0145681	0.0241455
Metabolism; Lipid metabolism	0.0466425	0.0487686	0.0478365	0.0479486	0.0423393	0.0490879
Metabolism; Metabolism of cofactors and vitamins	0.0885918	0.0901275	0.0837482	0.0878236	0.0830489	0.100341
Metabolism; Metabolism of other amino acids	0.0427676	0.0410802	0.042898	0.0398444	0.0382033	0.0386603
Metabolism; Metabolism of terpenoids and polyketides	0.0303079	0.0324349	0.0256702	0.0245858	0.0220395	0.0284137
Metabolism; Nucleotide metabolism	0.0597161	0.0582237	0.0453483	0.0545285	0.0509178	0.0719404
Metabolism; Xenobiotics biodegradation and metabolism	0.0382047	0.0321283	0.0434136	0.0357533	0.0444064	0.032179

## Sheet: KO abundance
	NY_INDOOR	NY_OUTDOOR	SD_IHOSP	SD_OHOSP	SD_IHOUS	SD_SCRPP
K00001	0.000440563	0.00044832	0.000172015	0.000144405	8.34203e-05	0.000161842
K00002	6.62202e-05	0.000181974	1.80585e-05	7.71632e-06	0	0
K00003	0.000401704	0.00044093	0.000699717	0.000521365	0.000648902	0.000288649
K00004	7.19646e-05	0.000131786	0	0	3.50202e-05	0
K00005	0.000111966	0	8.7189e-05	5.95476e-05	2.33513e-05	0.000317065
K00007	6.58771e-06	0	0	0	9.57179e-06	0
K00008	0.000105644	4.46536e-05	0.00013588	3.0276e-05	7.1214e-05	0
K00009	9.253e-05	0.000762193	5.60097e-06	5.01544e-05	5.62307e-05	0
K00010	0.000170491	0.000140604	0.000148854	0.000103451	0.000822836	0
K00012	0.000813412	0.00128553	0.000709843	0.000758709	0.00031081	0.000679816
K00013	0.000488576	0.000268016	0.000713796	0.000381064	0.000568661	0.000872224
K00014	0.000783768	0.000539648	0.00103624	0.00106866	0.00112245	0.000848471
K00015	5.21641e-05	9.56233e-05	0.000202486	0.000235591	7.6334e-05	5.76279e-05
K00016	0.000353866	4.86619e-05	0.000148138	0.000198568	2.59048e-05	0.000117361
K00018	0.000177112	4.87119e-05	0	4.96949e-05	7.77956e-05	0.000352454
K00019	0.000394423	0.000286109	0.000765613	0.000587584	0.000458284	0.000138664
K00020	0.000481012	0.000254559	0.000465068	0.000242791	0.000244113	0.000307351
K00021	3.66678e-05	0	0	4.80003e-06	0	0
K00023	0.000205632	0.000298518	0.00102844	0.000122848	4.78573e-05	7.24391e-05
K00024	0.000507742	0.000441022	0.000681037	0.000400019	0.00121314	0.00147755
K00025	0	0	0	0	2.52595e-05	0
K00027	0.000342093	0.00062495	0.000128489	0.000116819	2.75906e-05	0.000207731
K00028	3.70164e-05	0	0	4.84702e-06	0	0
K00029	0.000535389	0.000425886	0.00103347	0.000462877	0.000850775	0.000380522
K00030	5.59046e-05	4.38748e-05	1.16087e-05	3.71629e-05	5.82943e-05	0.000158303
K00031	0.000817779	0.000848663	0.000879332	0.000650664	0.000575344	0.00117752
K00032	0	0	0	0.000114838	3.85303e-05	0
K00033	0.000528805	0.000309456	0.000204587	0.000483006	0.000543808	0.000371112
K00034	0.000130148	0.000165487	0.000496805	0.000141385	0.000117726	6.67597e-05
K00035	4.54494e-05	0	0.000139043	0.000417136	3.99585e-05	0
K00036	0.000601129	0.00081497	0.000341072	0.000605196	0.00174456	0.00077172
K00037	0	0	0	2.89392e-05	1.50525e-05	0
K00038	1.05499e-05	0	0	0	1.55358e-05	0
K00039	3.23122e-05	0	0	4.07404e-05	6.3492e-05	0
K00040	0.000125546	6.88e-05	0.000768363	8.67871e-05	3.64451e-05	0
K00041	8.60345e-05	7.25704e-05	0.000220644	1.83347e-05	0.000115402	0
K00042	0.00011308	5.18775e-05	8.92921e-05	8.8421e-05	0.000138237	0.000250679
K00043	8.06158e-06	0	0	0	0	0
K00045	0.000106209	0.000102707	9.04947e-06	8.63618e-05	0.000181345	0.000163825
K00046	0.000196585	5.70371e-05	0.00021156	7.80805e-05	0.000137032	0.000345504
K00048	1.54597e-05	0.000169798	5.61499e-06	0	1.12746e-05	0
K00050	0.000364498	7.84314e-05	0.000124453	0.000549447	9.36363e-05	0.000235214
K00052	0.000661789	0.000448969	0.000231667	0.000677436	0.000238694	0.000864438
K00053	0.000533924	0.000656675	0.000579153	0.000444942	0.000535111	0.00084238
K00054	8.50697e-05	0.000233369	7.7144e-05	4.59486e-05	8.25421e-05	0
K00055	2.4165e-05	4.42563e-05	2.34202e-05	2.24981e-05	7.05707e-05	0.000106475
K00057	0.000513425	0.000799837	0.000317542	0.000279637	0.000312904	0.00056685
K00058	0.00105146	0.000915277	0.000610438	0.000853507	0.00101374	0.0017191
K00059	0.00230095	0.00183682	0.00324698	0.00252503	0.00151716	0.00222578
K00060	0.000125795	0.000184396	3.04999e-05	0.000109517	2.45187e-05	0.000111022
K00064	0.000136524	4.69138e-05	0.000335248	0.000127453	0.000224632	0.000169553
K00065	0.00016743	0.00017309	0.000221664	0.000148169	0.000215675	0.000349627
K00066	9.02565e-05	0	0	5.78094e-05	0.000141397	0
K00067	0.000804526	0.000508962	0.000498614	0.000459422	0.00101682	0.000553057
K00068	4.10647e-05	5.65873e-05	0	4.83987e-05	0	0
K00073	2.49638e-05	4.5737e-05	0	7.75903e-06	2.43231e-05	0
K00074	0.000583683	0.000849541	0.00112426	0.00088973	0.000439461	0.000284336
K00075	0.000562907	0.000919154	0.000653088	0.000370051	0.000489256	0.000816578
K00076	0	0.000114407	1.51558e-05	1.95796e-05	1.52712e-05	0
K00077	0.000618359	0.000295819	0.000189256	0.000570303	0.000406906	0.000237899
K00082	1.09883e-05	0	0.000273183	3.12116e-05	0	0
K00086	1.52707e-05	4.1925e-05	0	0	0	0
K00087	4.69453e-06	0	0	4.28873e-06	0	3.05618e-05
K00088	0.000953416	0.000612825	0.000595651	0.00047351	0.000592307	0.00228791
K00090	0.000183426	4.80375e-05	0.000158943	1.63272e-05	0.000115051	0.000115815
K00091	3.41103e-05	9.37701e-05	0	3.98038e-05	1.24718e-05	0.000169446
K00094	0	0.00013784	6.07972e-06	7.79585e-06	0	0
K00096	1.59307e-05	0	4.05218e-05	0	0	0
K00097	0.000356425	0.000186621	0.000543306	0.000380178	0.00138988	0.00101157
K00098	0.000160101	4.63216e-05	0.000110332	1.57234e-05	8.62364e-05	5.57858e-05
K00099	0.000393397	0.000207681	0.000406531	0.00028798	0.000176456	0.000748356
K00100	0.000284587	0.000138028	6.08804e-05	0.000202978	0.000244702	0.000498601
K00101	0.000361356	0.000364301	0.00133828	0.000807056	0.000429743	4.85908e-05
K00102	0.00011897	3.25827e-05	0.00019375	0.000229851	0.000146617	0
K00103	2.63119e-05	0.000180317	4.76718e-06	6.07321e-06	3.82293e-05	0
K00104	0.000252157	0.000327447	0.000307813	0.000153213	0.000183219	0.00039219
K00105	2.15867e-05	0	0	0	0	0
K00108	0.000305901	0.00015508	0.000434375	0.000634809	0.000541557	0.000444469
K00111	0.000515693	0.000577701	0.000932981	0.000474201	0.000407706	0.000575245
K00112	4.99838e-05	0	2.0723e-05	0	0.000540507	0.000140996
K00113	2.92844e-05	0.000120543	5.31369e-06	0	0	0
K00114	0.000107818	0	3.71004e-05	0.000206884	0.000527071	0.000100469
K00115	5.9861e-06	0	0	0	0	0
K00116	0.000319552	0.000134679	0.000213585	0.000345252	0.00036554	0.000281868
K00117	0.000313651	0.000187824	0.000759396	0.000520894	0.000179658	0.000111686
K00118	0	0	0	2.23212e-05	1.16709e-05	5.28227e-05
K00119	0.00024759	6.45741e-05	5.97289e-05	0.000211449	0.000119636	0.000270087
K00120	0	0	0	3.92217e-06	0	0
K00121	0.000546635	0.000217592	0.000610241	0.000825464	0.00106377	0.000418629
K00122	2.00048e-05	0	0	2.46388e-05	4.84572e-05	0
K00123	0.000715676	0.000610197	0.000796563	0.00106998	0.00109693	0.000913388
K00124	0.000246924	0	8.66094e-05	0.000317002	0.000160839	0.000242976
K00126	2.04643e-05	0	9.15467e-05	2.04995e-05	0	0
K00127	0.000131522	0	2.40413e-05	0.000321642	0.0001293	0
K00128	0.00127026	0.000994416	0.000448665	0.00133214	0.000989921	0.00114864
K00129	0	0	1.83581e-05	0	0	0
K00130	0.000253223	0.000138778	0.000426461	0.000408566	0.000294087	4.15158e-05
K00131	3.14993e-05	6.90495e-05	0	2.32293e-05	0.000100592	4.13087e-05
K00133	0.000663876	0.000820981	0.000597462	0.000448731	0.000472963	0.000768701
K00135	0.00114154	0.000808483	0.00089207	0.000615217	0.000838144	0.000883535
K00137	0.00012314	0	0	0.000155492	0.000131788	4.25315e-05
K00138	2.42431e-05	0	0	0	8.79058e-06	0
K00140	0.000537066	0.000744134	0.000871683	0.000773363	0.000591161	0.00032364
K00141	3.81631e-05	3.48602e-05	0.000368605	1.75957e-05	9.23462e-06	0
K00145	0.000494173	0.000655817	0.000427733	0.000477214	0.000411203	0.00135435
K00146	5.01031e-05	6.86405e-05	0.000240405	1.73161e-05	9.99888e-05	0
K00147	0.000335742	0.000195979	0.000171035	0.000496229	0.000613523	0.00136354
K00148	0.000119263	8.18358e-05	2.70577e-05	6.91611e-06	0.000152068	0
K00150	4.21097e-05	4.62971e-05	0	0	1.23129e-05	0.000223022
K00151	0.000120133	3.46515e-05	0.000224414	0.000250656	0.000302897	0.00024878
K00152	6.40721e-06	0	0	0	1.86078e-05	0
K00153	8.7988e-05	0	0	5.95583e-05	0	5.28534e-05
K00154	0.000188038	0.000106632	9.3965e-06	7.18003e-05	0.000207195	0.000127656
K00155	5.84308e-05	0	2.35214e-05	3.59474e-05	1.88603e-05	0
K00156	0.000346133	6.01483e-05	0.000790638	0.00037309	0.000111351	3.58957e-05
K00158	0.000126826	0	3.98769e-06	0	0	0
K00161	0.000562684	0.000403302	0.000480233	0.000774858	0.000202497	0.000539219
K00162	0.000532632	0.000503174	0.0010229	0.00100881	0.000401386	0.00148693
K00163	0.000536703	0.000478048	0.000688557	0.00113842	0.000361637	0.000740464
K00164	0.000531321	0.000606504	0.000465199	0.000671167	0.000529301	0.00105678
K00166	9.87393e-05	8.34056e-05	0.000926652	0.000282119	0.000121807	0
K00167	0.00018568	9.27951e-05	0.000927089	0.000378003	0.0001234	5.58796e-05
K00169	2.16417e-05	0	0	0	0	0
K00170	2.71871e-05	4.98641e-05	0	1.69717e-05	0	0.000180511
K00172	0	0	0	1.16499e-05	0	0
K00174	0.000168505	0.000273591	0.000117516	0.000235795	9.05737e-05	0.000654584
K00175	0.000132807	0.000261143	9.68148e-05	0.000160278	4.17568e-05	0.000378637
K00177	0	7.24521e-05	0	1.25465e-05	0	0
K00179	8.43463e-05	0	0.000186711	4.83153e-06	0.000144891	6.8815e-05
K00180	0.000114698	0	5.87658e-05	0.000326704	5.08308e-05	7.69988e-05
K00183	5.95683e-05	0	0	1.01486e-05	0	0
K00184	0.000112686	5.60444e-05	3.7012e-05	0.00027205	4.44344e-05	0.000835222
K00185	0.000102839	0.000225615	0.000173999	0.000145815	0	0.00036054
K00198	5.02409e-06	0	0	0	0	0
K00200	2.24486e-05	0	2.84153e-05	3.09205e-05	8.12764e-06	0.000183429
K00201	0	3.8318e-05	0	0	0	4.59433e-05
K00202	3.81169e-05	0	0	0	0	0.00012681
K00207	2.06223e-05	0	0	2.25359e-05	1.78305e-05	0
K00208	0.000535017	0.00116819	0.000493656	0.0007702	0.000178109	0.00107745
K00210	4.04976e-05	0	0.000123646	6.03418e-05	1.18286e-05	0
K00211	6.89924e-06	0	0	0	0	0
K00214	0	4.81532e-05	0	0	0	0
K00215	0.0005572	0.000614138	0.0002958	0.000276799	0.000253258	0.000405563
K00216	8.40172e-05	5.7908e-05	0	1.98315e-05	0	0
K00217	5.74162e-05	0	5.96389e-06	0	0	0
K00218	0	0	0	0	0	0.00028047
K00219	0.000204149	0.000531642	7.72305e-05	0.000288902	0.000386191	0.000285002
K00220	0.000152456	0	0.000536068	9.48503e-05	6.1924e-05	0.000168253
K00221	0	0	0.000285254	1.12271e-05	0.000244357	0
K00224	7.74137e-06	0	0	0	1.12919e-05	0
K00226	0.000809134	0.000655581	0.000291249	0.000254419	0.000311404	0.000789748
K00228	0.000426489	0.000537643	0.000666342	0.000548562	0.000169137	0.000707356
K00230	5.34614e-05	0.000148011	0	0	0	9.05141e-05
K00231	0.000103	0.000211716	6.99606e-05	0.000285062	0	0.000126712
K00232	2.45507e-05	2.68545e-05	3.54655e-05	0.00028294	1.41886e-05	3.19962e-05
K00240	0.000681705	0.00046262	0.000743121	0.000722797	0.000478673	0.000770983
K00241	0.000450273	0.000623949	0.000786893	0.000854567	0.000314592	0.000382426
K00242	0.000181483	0.000550656	0.000939448	0.000806764	0.000272785	0.000226765
K00243	0.00012576	0.000213105	7.05483e-06	0.000536325	5.68133e-05	0.000257639
K00244	0.000111884	0.000116626	0.000489135	2.44227e-05	0.000323757	0.000139131
K00245	2.99775e-05	0	9.47951e-05	9.4069e-06	0	0
K00246	0	0	1.98738e-05	2.59816e-05	0	0
K00247	5.05299e-05	9.37421e-05	0	3.30131e-05	0	0
K00248	0.000100848	0.000258072	0.00015109	0.000298195	0.000215009	4.41688e-05
K00249	0.000874368	0.00051124	0.00145605	0.00138756	0.00203458	0.000660496
K00252	0.000489611	0.000285044	0.000980131	0.000426667	0.000270222	0.000244443
K00253	0.000414278	0.000690314	0.000359804	0.000370542	0.000269456	0.000584987
K00254	0	4.06442e-05	0	0	0	0
K00255	3.83039e-05	0	5.56404e-06	1.42328e-05	5.58562e-05	0
K00256	5.11005e-06	0	2.5847e-05	4.67919e-06	2.95522e-05	0
K00257	0.00107424	0.00100675	0.000847882	0.00137644	0.00107755	0.000848954
K00258	2.66043e-05	0	0	8.29476e-06	0	0
K00259	0.000695095	0.001229	0.000580673	0.000237943	9.33097e-05	0.000739056
K00260	4.30922e-05	3.94098e-05	5.2113e-06	1.33072e-05	0	0
K00261	0.000138543	0.000151989	9.04281e-05	0.00010894	0.000272066	0.000455506
K00262	0.000271652	0.000186223	0.000211728	0.000590107	9.87438e-05	0.000223149
K00263	0.000204239	0.000628506	0.000302924	0.000129387	0.000167072	0.000324137
K00264	1.70786e-06	0	0	4.60395e-06	0	0
K00265	0.000388783	0.000436536	0.000585855	0.000694829	0.000418568	0.000409886
K00266	0.000629192	0.000422293	0.000488403	0.000473792	0.000372934	0.000884551
K00271	0	4.44464e-05	5.88031e-06	7.53269e-06	0	0
K00274	0.000245569	7.08472e-05	0.000187292	0.00020869	4.69284e-05	8.48103e-05
K00275	0.000256613	0.000322125	0.0004185	0.000332617	0.000413815	0.000548619
K00276	9.38917e-06	7.70027e-05	3.38939e-05	6.43318e-05	6.77796e-05	0
K00278	0.000398764	0.000423803	0.000180931	0.000114989	0.000241618	0.000506542
K00280	0	2.65284e-05	9.10878e-05	0	0	0
K00281	0.000361301	0.000248895	0.000164224	0.00042977	0.000267356	0.000590604
K00282	8.80925e-05	0.000408779	0.000815543	0.000400856	1.97043e-05	0.000133586
K00283	0.000151475	0.000172944	0.000123432	0.000232736	9.16187e-06	0.00012416
K00284	3.05778e-05	6.40837e-05	0.000141981	8.06016e-05	3.70655e-05	0.000333391
K00285	0.000495801	0.000591437	0.00167365	0.000532556	0.00161106	0.000378436
K00286	0.000700265	0.000992158	0.000708131	0.00030138	0.00010293	0.000400242
K00287	0.000684955	0.000986578	0.000322321	0.000500732	0.000122354	0.000464592
K00290	6.06873e-05	4.16505e-05	0	8.45263e-05	4.42372e-05	5.00309e-05
K00293	6.74282e-06	0	0	0	0	4.43015e-05
K00294	0.000135148	3.2182e-05	4.25243e-06	0.000108074	8.51729e-06	0
K00297	0.000610159	0.000465892	0.000178789	0.000292623	0.000185877	0.000673397
K00299	0.000199949	0.000138216	0.000513295	0.000537135	0.00022231	0
K00301	8.33945e-05	0.000208125	2.20218e-05	1.40788e-05	0.000154734	0.000149999
K00302	0.000196154	9.12051e-05	7.52507e-05	0.000140662	0.000252636	0.000325281
K00303	0.000327603	4.08714e-05	5.9459e-05	0.000303952	0.000227839	0.000245369
K00304	0.000148131	0.000206617	1.37499e-05	1.83298e-05	0.000112114	0
K00305	6.30023e-05	0	9.24396e-06	3.61279e-05	0.000224234	0.000170064
K00311	0.000489474	0.000677653	0.00046393	0.000248001	0.000203707	0.000294237
K00313	7.77119e-05	3.87594e-05	5.12496e-05	0	4.11255e-05	0
K00314	0.000106604	2.07895e-05	0	6.92208e-06	5.48063e-06	2.46879e-05
K00315	0.000246886	0	8.75486e-06	1.10525e-05	1.16617e-05	0.000183907
K00316	2.05555e-05	0	0	3.76508e-05	5.20132e-05	0.000134084
K00317	1.48968e-05	0	0	0	0	0.00014728
K00318	0.000248609	0.000220299	9.90918e-05	0.000141834	0	5.29955e-05
K00320	8.67017e-06	4.76789e-05	0	3.24018e-05	0	5.74637e-05
K00322	0.000218146	0.000316507	5.11315e-05	0.000130203	0.000102487	0.000252555
K00324	0.000848392	0.000496584	0.000545586	0.000439375	0.00109744	0.00131813
K00325	0.000412585	0.000466738	0.00106782	0.000217636	0.000142714	0.000773825
K00329	0.000129602	0.000203805	0.000114671	0.000112815	2.71451e-05	6.15193e-05
K00330	0.000517723	0.000359823	0.000370648	0.000284265	0.000121456	0.000222037
K00331	0.000486744	0.00077954	0.00075208	0.000931526	0.000285137	0.000951754
K00332	0.000299042	0.000528775	0.0011656	0.000774496	0.0013098	0.000965798
K00333	0.000494585	0.000891399	0.000846636	0.000520331	0.000204334	0.00150785
K00334	0.000390646	0.00014413	0.000554543	0.000785971	0.000154708	0.00052827
K00335	0.000416953	0.000843834	0.000706389	0.000562113	0.000316708	0.00109416
K00336	0.000301899	0.000664997	0.00108291	0.000678503	0.000793186	0.001231
K00337	0.000643886	0.00104346	0.000480224	0.000607848	0.000410104	0.00174747
K00338	0.000537647	0.000669901	0.000345718	0.000671293	0.000279868	0.000637417
K00339	0.000520892	0.000351395	0.000820372	0.000571033	0.000226169	0.00025733
K00340	0.000494461	0.000306436	0.000326243	0.000344024	0.000969554	0.000507764
K00341	0.000565835	0.00100448	0.00170668	0.000490454	0.00046622	0.000582325
K00342	0.000540054	0.000997291	0.000861047	0.000904985	0.000528079	0.000675701
K00343	0.000464155	0.000522718	0.000727737	0.00097914	0.000184626	0.00075065
K00344	0.000727454	0.000333362	0.000434881	0.000550164	0.000405484	0.000688737
K00346	6.11502e-05	0.000111786	2.46311e-05	3.76846e-05	0	0.000267907
K00347	7.33861e-05	0.000201391	0	2.0414e-05	1.06898e-05	0.000193383
K00348	4.11905e-05	5.67633e-05	0	0	0	0.000206276
K00349	3.57934e-05	6.5925e-05	0	2.27171e-05	0	0.000481598
K00350	6.06834e-05	6.7081e-05	0	0	0	0.000653813
K00351	0.000117332	8.04969e-05	5.32265e-06	0	0	0.000289856
K00354	2.17735e-05	3.98302e-05	0	1.34534e-05	0	0
K00355	0.000121913	0	0.000121585	5.24968e-05	9.81038e-05	0
K00356	0.000193857	0.000266912	0.000176724	0.000136636	0.000142321	6.45417e-05
K00358	1.25221e-05	0	0	0	5.56948e-05	8.44725e-05
K00359	6.47033e-05	0.000106403	0	5.97021e-06	0	0
K00360	4.82336e-06	2.63766e-05	0	4.4096e-06	0	0
K00362	0.000379611	0.000341858	0.000707023	0.000657377	0.00021043	0.000243844
K00363	0.000155565	0.000385053	0.000115227	0.000373656	7.81568e-05	0
K00364	0.000110541	9.34983e-05	6.18641e-06	0	2.48701e-05	0.000450513
K00365	2.7346e-05	5.01595e-05	0	8.53807e-06	0	0
K00366	7.34161e-05	9.27592e-05	2.45107e-05	8.2989e-05	3.27186e-05	0.000110766
K00367	0	0	0	0	0	5.84286e-05
K00368	8.15203e-05	0.000223536	1.97017e-05	3.76782e-05	2.96323e-05	0
K00369	0	1.86072e-05	0	0	0	0
K00370	0.000209633	0.000123576	0.000211917	0.000286875	2.03238e-05	9.1451e-05
K00371	0.000209644	0.000101354	0.000151807	2.83983e-05	8.94637e-06	4.04067e-05
K00372	0.000182349	0.00028146	0.000154322	0.000126236	0.000114188	0.00018006
K00373	0.00019886	0.000193839	0.000488255	5.56059e-05	1.72937e-05	7.8611e-05
K00374	0.000133756	0.000184554	0.000187519	4.22528e-05	4.93428e-05	0
K00375	0.000497525	0.000279679	0.000526769	0.00064707	0.000537158	4.18394e-05
K00376	6.92111e-05	8.11173e-05	0.00010713	0.000203517	0.000207162	3.22194e-05
K00378	4.09264e-05	9.60596e-05	1.26928e-05	2.68791e-05	3.38956e-05	0
K00380	0.000265882	0.000215435	9.60247e-05	0.00056749	0.000298799	0.000192521
K00381	0.000297748	0.000193243	0.000583375	0.000304882	0.000547105	0.000329053
K00382	0.00128678	0.000982495	0.00162791	0.00145848	0.000762271	0.00201586
K00383	0.00059384	0.000292688	0.000232152	0.000234218	0.000145463	0.000219123
K00384	0.00152469	0.00154845	0.000849669	0.00160679	0.000738654	0.00148025
K00387	1.94185e-05	0.000106445	0.000178219	8.95889e-05	0	0
K00389	0.000132154	0	0	3.23153e-05	0	0
K00390	0.000309112	0.00038457	0.000392914	0.00022526	0.000512923	0.000598327
K00392	3.63019e-05	2.83745e-05	0	4.75075e-05	5.99981e-05	0.00037219
K00394	1.58228e-05	0	0	4.834e-06	0	3.4425e-05
K00397	0	0	0	0	2.84071e-05	0
K00404	0.000487837	0.000461894	0.000248512	0.000310417	0.000524052	0.00019721
K00405	0.000419781	0.000591477	5.69652e-05	0.00047726	0.000387115	6.50252e-05
K00406	0.00019023	0.000366589	0.000256564	0.000214306	0.000251231	0.00031641
K00407	2.31882e-05	0	0.000521606	0.000259841	0.000142739	0
K00423	5.45683e-06	0	3.55118e-05	0	7.8986e-06	0
K00425	0.000823171	0.00129406	0.000637936	0.00130647	0.00155656	0.000376715
K00426	0.00082624	0.00163474	0.000787088	0.000739349	0.00035012	0.000491937
K00427	7.43504e-05	0.000250532	8.2754e-06	1.05099e-05	8.28575e-06	3.7404e-05
K00428	0.000340087	0.00074687	0.00010427	0.000378882	9.91513e-05	0.000747556
K00429	3.36359e-05	9.24499e-05	0.000244668	0.000188274	0.000135227	0
K00432	0.00067361	0.000447653	0.000475253	0.000220008	0.000601167	0.000456415
K00433	0.000385242	0.000159112	0.000280921	9.9526e-05	0.000113108	0
K00435	0	0	1.50282e-05	1.94086e-05	0	0
K00436	7.45061e-06	0	0	0	0	0
K00441	1.52413e-05	0	0	0	0	0
K00446	7.9715e-05	0	6.44861e-06	1.65681e-05	0.000168589	0
K00448	0.000136969	0	0.000155246	0.000142682	7.38247e-05	0
K00449	0.000186337	6.04786e-05	0.000464836	0.000549949	0.000177802	7.3411e-05
K00450	5.75643e-05	0	0.000932806	0.000176262	0.000120146	0
K00451	0.000323219	0.000512371	0.000401304	0.0003194	0.000177771	0.000472849
K00452	5.01537e-05	6.93424e-05	1.83946e-05	7.1874e-05	0	0
K00453	0.000154101	0.00019951	0.00034333	0.000101859	0.000146097	0.000240748
K00455	0	0	0.000105838	9.09165e-06	0.00015626	0.000193258
K00457	0.000410033	0.000394737	0.000287088	0.000633147	0.00042941	0.000189437
K00459	0.000304789	0.000316899	0.000281527	9.21276e-05	0.000180536	0.000435913
K00462	0	0	1.40794e-05	9.0701e-06	0	0
K00464	1.25703e-05	0	0	1.15866e-05	0	0.000164838
K00466	5.4433e-06	0	3.93586e-06	0.000214727	0.000141816	3.55552e-05
K00467	5.71933e-05	0	0	1.52238e-05	0	0
K00469	1.85851e-05	0	0	0	0	0
K00470	5.53778e-05	0	1.14975e-05	2.94375e-05	1.15461e-05	0
K00471	6.02589e-05	0	0	2.7968e-05	2.19585e-05	0
K00472	2.19376e-05	4.01335e-05	0.000573197	7.45744e-05	8.52072e-05	0.000192673
K00476	0	3.76513e-05	0	0	9.98361e-06	0
K00477	0	0	7.58564e-05	0	4.16387e-05	0
K00479	0.000131666	4.01459e-05	1.59271e-05	0.000189886	6.39254e-05	0
K00480	0.000145367	7.97768e-05	0.000210994	0.000249263	8.46797e-05	9.57352e-05
K00481	0.000256511	8.28405e-05	1.64348e-05	0.000203107	0.000527869	0
K00483	6.84174e-05	3.40818e-05	2.7026e-05	4.58473e-05	9.026e-06	0
K00484	0.000218973	0	0	1.31633e-05	0	0
K00485	3.06192e-05	0	0	5.63949e-06	1.77679e-05	4.01228e-05
K00486	2.62727e-05	7.20186e-05	0	1.81915e-05	9.54279e-06	8.62404e-05
K00491	5.4933e-05	4.31036e-05	0	0	0	0.000207272
K00492	0.000158629	0.000113489	0.000150046	1.27583e-05	8.02519e-05	0
K00493	2.66106e-05	0	4.82202e-06	1.22895e-05	0	4.36913e-05
K00494	0.000127146	0.000139801	6.1666e-05	4.74641e-05	2.47896e-05	0.00011226
K00495	6.70607e-06	0	0	0	0	0
K00496	0.000120693	0.00020707	2.19098e-05	0.000546204	7.69693e-05	0
K00499	7.95039e-06	4.36748e-05	0	1.47952e-05	0	0
K00500	0.000155916	0.000270578	0.0002685	0.000198812	0.000551472	0
K00505	1.36827e-05	0	4.96071e-06	6.3258e-06	4.97442e-05	0
K00507	0.000330953	0.000346262	0.00055539	0.000117264	0.000126491	0.00124892
K00508	0.000136881	0.000208769	2.20902e-05	7.76806e-05	1.10871e-05	0
K00510	5.4332e-05	0	0	2.05625e-05	6.40767e-05	7.27459e-05
K00514	0	0	0	0	0	0.000160189
K00517	0.000205655	0.000155633	0.000334406	0.000183859	0.000732816	0.000513327
K00518	2.61362e-05	0	9.59618e-06	5.0095e-05	0	0
K00520	0.000352552	0.000499512	0.000250843	0.000307795	0.000299771	0.000477809
K00523	2.57299e-05	4.71581e-05	0.000449336	0.000704774	0.000150547	0.000113639
K00524	0	0	0	0	0	0.00024704
K00525	0.000872112	0.000645586	0.000628865	0.00140988	0.00122131	0.00275156
K00526	0.000656759	0.000639705	0.000568326	0.00115495	0.000947678	0.00115521
K00527	0.000286361	0.000205334	0.000223693	0.000210144	5.42221e-05	3.05612e-05
K00528	0.000554898	0.000516306	0.000527966	0.000350675	0.000112372	0.000169638
K00529	0.000141729	0.000163793	0.000471156	0.000256092	0.000130442	0.000196673
K00532	6.28256e-06	0	0	0	0	0
K00534	0	0	2.35744e-05	0	0	0
K00537	0.000799983	0.000453973	0.00125517	0.000606114	0.0004905	0.000112108
K00540	0.000723116	0.000755573	0.00106025	0.000531684	0.000979325	0.00103359
K00544	7.4509e-06	0	0	0	0	0
K00547	0.000149269	0.000272997	7.73525e-05	2.63291e-05	0	0.000187112
K00548	0.000568412	0.000497284	0.000960792	0.000704881	0.000325019	0.000708294
K00549	0.000580079	0.000346281	0.000278258	0.000536488	0.00102222	6.88391e-05
K00551	1.56784e-05	0	0.00011961	5.10267e-05	0	0
K00554	0.00056948	0.000697838	0.00013868	0.000358545	9.31787e-05	0.00105745
K00555	0	0	0	0	0	8.43608e-05
K00556	0.000124961	0.000125434	0	0	0	0.000228671
K00557	9.42314e-05	0.000258789	5.70559e-06	0.000321312	0.000263544	0.000103705
K00558	0.000789676	0.00152569	0.000342365	0.00118853	0.000611073	0.000509705
K00560	0.00108182	0.0008511	0.00108475	0.000934787	0.00060978	0.000964604
K00561	0.000139635	5.92465e-05	0	0	0	0
K00563	0.000188066	0.00021812	8.6661e-05	9.3131e-06	0.000305421	0
K00564	0.000235534	9.96909e-05	5.9384e-05	0.000814326	0.000265457	0.000481177
K00566	0.000785727	0.000604204	0.000405341	0.000306897	0.000137585	0.000674495
K00567	0.000532541	0.000302563	0.000401565	0.000183837	0.00132102	0.000185199
K00568	0.000342886	0.000531909	0.000274077	0.000172198	0.000205245	0.000573471
K00569	8.12505e-05	0.00012821	0.000101977	1.10294e-05	0.000188701	7.79706e-05
K00571	0.000196183	0.000372835	0.000180808	5.60377e-05	2.19977e-05	0
K00573	0.00052059	0.000672382	0.00110979	0.000797441	0.000212426	0.0012618
K00574	0.000647263	0.000459923	0.000718924	0.000353594	0.00082159	0.00030137
K00575	0.000463399	0.000357076	0.00107377	0.00057345	0.000407661	6.15932e-05
K00577	1.10846e-05	0	0	0	0	0
K00588	1.12542e-05	6.21232e-05	0	0	0	0
K00590	8.0172e-06	0	0	0	0	0
K00594	0	0	0	1.32059e-05	0	0
K00595	0.000148317	0	9.15195e-05	0.000171983	0.000140467	0.000244359
K00596	4.20191e-05	0	5.07969e-06	0	6.11383e-05	0
K00598	0.0001977	5.73657e-05	0.000189988	0.00024547	0.000153153	0
K00599	0.000764992	0.000731244	6.65203e-05	0.000170567	0.000121523	0.00033013
K00600	0.000819312	0.00149821	0.000848245	0.000732335	0.000560391	0.0027177
K00602	0.000655675	0.000332599	0.000553811	0.000452727	0.00155863	0.000596514
K00603	2.77781e-05	0	0.000209154	8.68013e-06	0	0
K00604	0.000674061	0.000829391	0.00028413	8.29585e-05	0.000376607	0.000353017
K00605	0.000598628	0.000758583	0.000668919	0.00072725	0.000727487	0.00101274
K00606	0.000798786	0.0004346	0.000503612	0.000695747	0.00178204	0.000657158
K00609	0.00057735	0.000684049	0.000801934	0.000814254	0.000767365	0.00106068
K00610	7.35296e-05	0	2.16702e-05	1.42298e-05	2.19673e-05	0
K00611	0.000290481	0.000193662	0.000147384	0.000543196	0.000902002	0.000583754
K00612	0.000141531	0.000238356	2.7552e-05	0.000224722	0.000165457	0.000177782
K00613	3.03629e-05	8.33544e-05	0	1.4097e-05	1.10665e-05	0.000150191
K00614	1.18349e-05	6.53842e-05	0	0	3.50097e-05	0
K00615	0.00106206	0.00145452	0.000987276	0.00106643	0.000533847	0.00169941
K00616	0.000536754	0.000897252	8.38643e-05	0.000378087	0.000520533	0.00108445
K00619	2.85026e-05	0.000237041	1.04904e-05	0.000110023	0.000148783	9.69127e-05
K00620	0.000285541	0.000120551	0.000138165	0.000346199	0.000319932	0.000434068
K00622	2.86875e-05	0	9.76087e-05	0	0	0
K00624	4.81787e-06	0	0	0	0	0
K00625	0.000186889	0.000326924	0.000105066	4.7573e-05	0	0
K00626	0.00135201	0.00110714	0.00128528	0.00149716	0.0017308	0.00152638
K00627	0.000579524	0.000749607	0.000971985	0.000673074	0.000321594	0.000854743
K00630	7.67513e-06	4.21458e-05	0	0	0	0
K00631	0.000128045	0.000116609	9.23667e-06	3.88997e-05	0.000239988	0.000138667
K00632	0.000408755	0.00048955	0.000782323	0.000468849	0.000303216	0.000832679
K00633	2.45475e-05	0.000135705	0	0	0	0
K00634	2.63309e-05	0.000144821	0	8.20525e-06	2.56947e-05	0
K00635	2.56632e-05	7.0332e-05	1.39444e-05	1.77542e-05	0	0
K00638	0.000176544	0.000650171	0	0	0	0
K00639	0.000430892	0.00073405	0.000102473	0.000192981	5.41253e-05	0.000979248
K00640	0.000605326	0.000351399	0.0013036	0.00056188	0.000406703	0.000852172
K00641	0.00049793	0.000630965	0.000395031	0.000256179	0.000357465	0.000353777
K00643	0.00019032	0.000179896	0.000623036	0.000430163	0.000238368	0.000517001
K00645	0.000558043	0.000297122	0.000308084	0.000395982	0.000158218	0.000955905
K00646	0	3.98271e-05	0	0	0	0
K00647	0.000350223	0.000122714	0.000140655	0.00023507	0.000238886	4.91148e-05
K00648	0.00104827	0.00146462	0.000881597	0.00100303	0.000942701	0.00187863
K00651	0.000191504	0.000100363	1.99287e-05	3.41677e-05	4.00916e-05	0.000302819
K00652	0.000302128	0.000248813	0.00048814	0.000133231	0.000187176	0.000149423
K00655	0.000773243	0.00140192	0.000634606	0.00185113	0.00227769	0.000849869
K00656	0.000183289	4.65816e-05	0.000122992	1.94236e-05	0.000184359	0.000110784
K00657	9.71493e-05	0.000307618	7.1457e-05	0	2.06721e-05	0
K00658	0.000744244	0.000496008	0.00043384	0.00061781	0.000212494	0.000686145
K00660	4.78805e-05	0.000175359	1.15994e-05	0.000111397	0	0.000210898
K00661	0.000293427	0.000352888	0.000355768	3.66123e-05	9.46475e-05	0
K00662	4.10157e-05	0.000113038	0	9.66752e-06	6.0339e-05	0
K00663	4.06404e-05	7.503e-05	0	0	0	0
K00666	0.00114372	0.000755314	0.00115599	0.00124645	0.00124075	0.000714253
K00672	1.84806e-05	0	0	0	0	0.000368408
K00673	4.20496e-05	0.000184921	0.000336458	0.000533504	0.000221306	0.000334037
K00674	0.00059711	0.000795539	0.000547781	0.00056095	0.00036759	0.000320552
K00675	4.01185e-05	0	0.000161031	0.000103882	8.84612e-05	0
K00676	2.67336e-05	0.000222041	0	1.28324e-05	1.98749e-05	9.05244e-05
K00677	0.000347598	0.000169045	7.46396e-05	0.000279476	0.000120307	0.000818884
K00680	0.000325552	0.000185894	3.28502e-05	5.32177e-05	0.000281682	7.52772e-05
K00681	0.000844537	0.000887959	0.000999187	0.000636771	0.00061555	0.0010236
K00683	0	0	1.2383e-05	7.9436e-06	0	0
K00684	0.000404279	0.000185961	0.000320407	0.000340723	0.000215485	0.000376528
K00685	0.000201668	0.000403568	0.000454112	0.000420846	0.000161227	0
K00687	3.31123e-05	0	0	0	0	0
K00688	0.000465953	0.000409117	0.000534076	0.000348623	0.000383734	0.000594426
K00689	5.20979e-06	1.41992e-05	0	0	0	0
K00690	7.71917e-05	3.25236e-05	1.28931e-05	1.09249e-05	0.000413218	0.00077743
K00691	3.56828e-05	0	0	0	0	0
K00692	6.95807e-05	0	0.000224513	1.74955e-05	5.50964e-05	0
K00693	1.89315e-05	0	0	8.64939e-06	0	0
K00694	0.00017395	0.000261412	9.41257e-05	0.000352902	0.000150513	5.65341e-05
K00696	1.33019e-05	0	6.3991e-05	1.21344e-05	6.3961e-06	0.000115328
K00697	0.000261261	0.000357497	0.000192844	0.000444404	0.000133928	0.000106658
K00700	0.000446779	0.000381658	0.000786188	0.000646106	0.000362792	0.000817886
K00701	0	0	3.98127e-06	0	0	3.59709e-05
K00703	0.000434807	0.000207205	0.000634439	0.000191695	0.000210386	0.000495841
K00705	0.000329929	0.000222139	0.00040342	0.000116174	0.000410914	0.000264804
K00712	2.44976e-05	6.71094e-05	4.43442e-06	0	0	0
K00720	7.22867e-05	7.93368e-05	2.62281e-05	2.67942e-05	0	0
K00721	0.000483931	0.000358575	0.000752778	0.000314155	0.000150114	0.000556732
K00745	8.78122e-06	0	0	0	0	0
K00748	0.000394494	0.0006248	0.000225878	0.000197242	0.000165901	0.000850584
K00752	5.99771e-06	0	0	5.51941e-06	0	0
K00754	0.000156691	0.000204799	3.25027e-05	4.84639e-05	0	0.000245912
K00756	0.00011343	0	0	3.28215e-05	4.12724e-05	0.000186605
K00757	0.000140256	0.000110402	0	0	5.89052e-05	6.68081e-05
K00759	0.000419993	0.000363238	0.000279529	0.000201316	7.79951e-05	0.000355142
K00760	0.000586209	0.000422992	0.000121573	0.000268173	0.000888667	0.000258166
K00761	0.000494446	0.000455236	0.00017244	0.000145564	0.000400404	0.000237424
K00762	0.000535231	0.00060513	0.000276399	0.000591411	0.00045031	0.00172039
K00763	0.000522775	0.00064138	0.000603559	0.000260825	0.000360154	9.04428e-05
K00764	0.000798674	0.000827122	0.00069235	0.000788358	0.000492926	0.00144319
K00765	0.00053662	0.000455091	0.000308961	0.000350393	9.11088e-05	0.000620212
K00766	0.000510648	0.000414136	0.000347063	0.000827635	0.000171314	0.000664888
K00767	0.000440395	0.000316306	0.00077483	0.000422581	0.000196723	0.00165658
K00768	0.000185113	0	4.0951e-05	5.24505e-05	0.000152774	5.31922e-05
K00769	0.000201418	0.000638256	0	4.1685e-05	4.29343e-05	9.78974e-05
K00772	0.000159112	5.47884e-05	0.00015238	0.000121668	7.30707e-05	0.000331468
K00773	0.000782089	0.0011147	0.000567873	0.000376927	0.000295944	0.000694148
K00777	0	3.65189e-05	0	6.15202e-06	0	0
K00782	0.00019315	0.000313634	0.000199542	0.000204836	5.03336e-05	0
K00783	0.000522223	0.000321829	0.000405976	0.00018226	0.000259848	0.000592581
K00784	0.000311579	0.000292081	2.75943e-05	0.000169368	4.43184e-05	0.000250617
K00785	1.72545e-05	0	0	0	0	0
K00786	5.73519e-05	0	0	1.52679e-05	0	5.41844e-05
K00788	0.00046475	0.000250314	0.000248834	0.000129049	0.000150636	0.000304197
K00789	0.000521201	0.000456185	0.00052108	0.000659185	0.000429431	0.00119546
K00790	0.00071499	0.00104866	0.000677893	0.000360493	0.000370901	0.000698724
K00791	0.000493211	0.00116263	0.000179526	0.000345872	0.000722015	0.00105136
K00793	0.000506741	0.000800152	0.000990268	0.000620741	0.000232175	0.00138072
K00794	0.000572487	0.000317434	0.000231803	0.000345416	0.00023485	0.000194709
K00795	0.000187128	0.000154513	0.000347766	0.000377367	4.11674e-05	0.000248824
K00796	0.000594848	0.000604334	0.000480012	0.000608734	0.000147539	0.000425508
K00797	0.000316908	0.000141281	0.00130877	0.000223929	8.76975e-05	5.67401e-05
K00798	0.000235261	0.000342313	0.000236074	0.00044912	0.000311927	0.00108517
K00799	0.00231998	0.00134534	0.00360936	0.00158717	0.00128576	0.00218173
K00800	0.000542464	0.000669355	0.000417875	0.000714511	0.00220836	0.000846614
K00801	1.53995e-05	0	0	7.15418e-06	0	0
K00803	6.2826e-05	9.38202e-05	5.37158e-05	1.57426e-05	7.4468e-05	0
K00805	0.000186223	5.39877e-05	4.28973e-05	3.68666e-05	2.87931e-05	0
K00806	0.000520589	0.00117184	0.000721949	0.0004216	0.000359934	0.000639414
K00808	0.000175833	3.57002e-05	2.35949e-05	0.000258446	9.45987e-06	0.000299199
K00809	0.000116854	0.000229392	6.6777e-05	0.000326922	2.43995e-05	0.000441908
K00810	0	0	0	0	0	0.000109124
K00811	8.19426e-05	8.17848e-05	3.78571e-05	4.83817e-05	0	0
K00812	0.000490556	0.000538649	0.000186325	0.00126812	0.000264027	0.000995311
K00813	5.93159e-05	0.000122097	1.0765e-05	6.87799e-06	0.000291685	0.000146587
K00817	0.00102232	0.000574953	0.00112928	0.00101922	0.000740497	0.00111724
K00818	0.000384101	0.000283809	0.000209115	0.000369954	0.000204467	0.000243361
K00819	0.000197089	0.000120185	0.000111255	6.76699e-05	0.000202	0.000144241
K00820	0.000769499	0.000687045	0.00108126	0.000821151	0.00105853	0.00128339
K00821	0.000186512	0.000163817	0.000855789	0.000803005	0.000347899	0.000196703
K00822	0.000253137	7.50457e-05	0.000277806	0.000487099	0.000258676	0.00013491
K00823	0.000243691	0.000152774	4.54486e-05	6.4423e-05	0	0
K00824	0.000296715	0.000105409	0.000753699	0.000125842	7.02404e-05	0.000127396
K00826	0.00105409	0.000670727	0.000576999	0.000773394	0.000420707	0.000692981
K00827	0	0	0	0	0	4.1997e-05
K00830	0.000136415	8.32199e-05	0.000115573	0.000154809	6.62903e-05	0.000399849
K00831	0.000596018	0.000785799	0.000785428	0.000554564	0.000266793	0.00141743
K00832	0.000202009	0.000164291	0.000966913	0.000256894	0.000316207	0.000197284
K00833	0.000341761	0.000771658	0.00200623	0.00406148	0.00873714	0.00272923
K00835	0.000129096	0.000118063	0	0	1.04413e-05	0
K00836	8.45429e-05	0.000285202	2.82741e-05	4.20122e-05	9.44646e-05	8.53635e-05
K00837	0.000112471	3.85638e-05	0.000107079	6.50659e-05	0.000122746	0
K00839	6.07557e-05	0	1.65454e-05	2.82085e-05	1.10721e-05	0
K00840	6.63163e-05	4.04439e-05	0	6.83353e-06	2.14689e-05	0
K00841	0.000114499	8.38264e-05	0	0	0	0
K00842	7.95246e-06	0	0	0	0	0
K00845	0.000452148	0.000143454	0.000164542	0.000349373	0.000865236	0.000461086
K00847	0.000382671	0.000551502	9.95541e-05	0.000145078	0.000267034	0.000544573
K00848	1.91151e-05	3.49221e-05	2.76947e-05	4.11316e-05	0.000101763	0.00012538
K00849	0.000384437	0.00032464	0.000617167	2.05717e-05	0	0.000243581
K00850	0.000733554	0.000483134	0.00012246	0.000265267	0.000170964	0.00120812
K00851	0.000482342	0.000276858	0.000117341	6.62406e-05	0.000177272	6.70208e-05
K00852	0.000528121	0.000250524	0.000172451	4.2642e-05	0.000160118	0.000362813
K00853	0.000119856	9.37536e-05	4.12904e-05	5.24373e-05	1.65366e-05	7.46493e-05
K00854	0.000267653	0.000238755	0.000184819	0.000332654	0.000921364	0.000367205
K00855	5.54682e-05	0.000152643	1.3472e-05	1.73313e-05	0	6.14319e-05
K00856	6.03982e-05	0	8.16275e-05	5.64159e-05	3.78702e-05	0
K00857	0.000326462	0.000467776	0.000256973	0.000195868	0.000161096	0.000651225
K00858	0.000547564	0.000408656	0.000419291	0.000626488	0.000326592	0.000493453
K00859	0.000687256	0.000654648	0.000303784	0.000405908	0.000736129	0.000637482
K00860	0.000180301	6.6425e-05	8.80773e-06	9.15929e-05	0.000177899	0.000242693
K00862	0	0	4.36535e-06	5.55028e-06	3.49811e-05	0
K00863	0.00016786	0	6.94334e-05	3.86178e-05	8.69325e-06	0
K00864	0.000411918	0.000269482	0.000698922	0.00112684	0.000401389	0.000805712
K00865	0.000416308	0.000169345	6.7199e-05	7.87989e-05	0.000236124	0.000508737
K00867	0.000361006	0.00014897	0.000111743	0.000126739	5.28871e-05	0
K00868	0.000326939	0.00068838	0.000252421	0.000189687	0.000352884	0.000192019
K00869	8.54455e-05	0.000234897	0	0	0	0
K00870	0	0	0	1.458e-05	0	0
K00872	0.000309355	0.000350467	4.63936e-05	9.37382e-05	2.66656e-05	0.000362529
K00874	0.000350154	0.000288869	0.000598969	0.000360032	0.000205	0.000290201
K00875	0	0	4.09063e-06	1.03879e-05	0	0
K00876	0.000330391	0.000363785	3.44042e-05	7.08669e-05	8.30915e-05	0.000251135
K00878	0.000241706	0.000110992	4.41027e-05	9.48516e-06	7.40328e-05	0
K00879	6.47368e-06	0	1.40718e-05	5.97341e-06	0	0
K00880	9.36546e-05	6.84277e-05	9.04367e-06	2.30147e-05	3.62455e-05	0
K00881	9.12546e-06	5.0216e-05	0	8.54804e-06	0	0
K00882	0.000245308	4.9993e-05	2.64714e-05	8.50864e-06	0.000559139	0.00012066
K00883	0.000144243	4.96012e-05	0.000124749	0.000168788	0.000581095	0
K00884	3.61293e-05	0	0	0	1.32326e-05	0
K00885	0	0	6.93112e-06	0	8.37065e-05	0
K00886	0.000134229	0.000170754	4.52392e-05	1.94776e-05	4.55803e-05	0
K00891	0.000417038	0.000768906	0.000361602	0.000314097	0.000393613	0.000767669
K00892	4.89416e-05	0	0	1.94108e-05	0	0
K00895	4.90166e-05	3.35694e-05	1.33091e-05	5.07831e-05	0	0
K00897	0.00010247	5.64801e-05	7.48151e-06	1.93212e-05	9.04453e-05	6.84049e-05
K00899	0.000141548	0	0	4.83857e-05	0	0
K00901	0.000108285	0.00013735	7.87539e-05	2.33015e-05	9.73922e-05	0.000165363
K00903	0.000175512	0.0001515	1.33365e-05	5.06125e-05	8.00011e-05	3.00582e-05
K00904	5.75936e-05	0	0	0	3.40375e-05	7.73447e-05
K00906	0.000108886	0.000119197	0.000350358	0.000184801	0.000267926	0.000106686
K00912	0.000321214	0.000650578	8.60898e-05	0.000709899	0.000111236	0.000391783
K00917	0.000118875	4.35336e-05	2.87951e-05	2.21186e-05	0.000682444	5.23474e-05
K00918	0	0	0	0	9.70467e-06	0
K00919	0.000371835	0.00047247	0.000250238	0.000322268	0.000181892	0.000317198
K00924	0.000100497	0.000152827	2.42289e-05	0.000148654	3.23397e-05	0.000656854
K00925	0.000472088	0.000740472	0.000206746	0.000201676	0.000141974	0.000345803
K00926	0.000181455	9.98439e-05	5.28672e-05	9.34569e-05	9.30552e-05	0.000120484
K00927	0.00048288	0.000570909	0.00053392	0.000351489	0.000573708	0.000783372
K00928	0.000822772	0.000462953	0.000535612	0.000755078	0.000409319	0.0018968
K00929	1.61694e-05	0	0	0	0	5.34409e-05
K00930	0.00052534	0.000736313	0.000515334	0.000861035	0.000308397	0.000317802
K00931	0.000398367	0.000357382	0.000419638	0.000249888	0.000629333	0.000698764
K00932	2.22138e-05	0	1.07504e-05	6.86842e-06	1.07883e-05	9.759e-05
K00936	0.000461208	0.000748238	0.000613754	0.000334779	0.000824834	0.000670213
K00937	0.000569176	0.000910729	0.00049439	0.000481749	0.000300579	0.00084325
K00938	0.000124156	0	0	0	0	0
K00939	0.000492674	0.000370817	0.000516033	0.000520108	0.000247881	0.00112611
K00940	0.000563425	0.000468458	0.000155474	0.000149378	0.000104978	0.000191425
K00941	0.000391963	0.000368486	0.00056459	0.000386031	0.000463018	0.000508952
K00942	0.000487091	0.000320249	0.000195287	0.000385681	0.000325652	0.000701111
K00943	0.000376203	0.000503535	0.00020023	6.49175e-05	0.000168366	0.000612051
K00945	0.000416991	0.000575724	0.00031376	0.000154069	0.000171176	0.0004668
K00946	0.000561867	0.000676004	0.000115034	0.000147733	0.000205611	0.000291075
K00947	2.59683e-05	4.76006e-05	0	0	0	5.73668e-05
K00948	0.000636689	0.000719493	0.000647521	0.000578725	0.000740321	0.00156112
K00949	0.000147351	0.000125149	0	6.45204e-05	0	0
K00950	0.000422365	0.00037735	0.00110179	0.000694291	0.000182487	0.000184763
K00951	0.000693046	0.000866607	0.00031385	0.000351421	0.000555587	0.000442007
K00954	0.000706669	0.000783464	0.000416043	0.000354371	0.000210703	0.000864523
K00955	0.00015754	0.000114939	0.000368173	0.000779603	0.00016711	0.000685437
K00956	0.000145647	0.000108894	0.000235116	0.000116162	0.000442531	8.69455e-05
K00957	0.00049621	0.000303424	0.00134564	0.000473592	0.000350204	0.000732562
K00958	8.34181e-05	7.62641e-05	0	5.78847e-05	1.01128e-05	0.000548588
K00961	0	0	2.49395e-05	0	9.15624e-05	0
K00962	0.000474915	0.000519188	0.000584325	0.000586187	0.000267586	0.00100037
K00963	0.000480574	0.000293739	0.00114695	0.000716004	0.000456125	0.000295226
K00965	0.000268262	8.4175e-05	0.000289478	5.6961e-05	1.1177e-05	0.000101136
K00966	6.77305e-05	3.71435e-05	0.000181688	7.51224e-05	0.000108319	0.000311543
K00969	0.000343303	0.00039241	0.000745718	0.000822258	0.000665366	0.00111448
K00970	0.000385613	0.000286641	0.000227339	0.000283544	0.000170905	0.00137284
K00971	0.000610587	0.000532839	0.00026167	0.000468595	0.000211961	0.000593155
K00972	3.23359e-05	3.54503e-05	0	1.19344e-05	0	0.000297064
K00973	0.00120501	0.00117342	0.000533586	0.000391046	0.000448491	0.000308011
K00974	0.000266399	0.000328656	8.20658e-05	0.000166098	0.000135508	0.000218704
K00975	0.00056197	0.000761038	0.000715083	0.000487135	0.000775967	0.000721072
K00978	0.000155721	0.000228928	0.000295686	0.000107744	0.000122231	0.000208034
K00979	0.000538847	0.000699162	0.000277889	0.000369235	0.000326756	0.000494444
K00980	7.7022e-05	0	0	1.49675e-05	0	0.000210641
K00981	0.000898559	0.000772863	0.000566193	0.000316063	0.000507931	0.000373385
K00982	0.000403436	0.000344659	0.000240044	0.000388425	0.000297654	0.000363487
K00983	8.27344e-05	0.000399074	0.0001737	1.95106e-05	0.000121749	0
K00984	3.11516e-05	0	0.000219923	6.85816e-05	1.52827e-05	0
K00986	0.000108651	3.72412e-05	0.000231402	0.000200869	0.000454179	4.46257e-05
K00988	0	0	0	0	0	6.25387e-05
K00989	0.000464774	0.00059625	0.000316025	0.00075652	0.000621309	0.000940427
K00990	0.000417298	0.000404672	0.000702805	0.000351167	0.00034818	0.000733684
K00991	0.000330348	0.000243049	9.66269e-05	7.29915e-05	0.00012993	0.000442603
K00992	9.82884e-06	0	0	0	0	0
K00995	0.000553657	0.00136658	0.000698833	0.000829151	0.000470346	0.0012671
K00996	5.93648e-05	0	4.78048e-06	1.21811e-05	9.58423e-06	0
K00997	0.000482811	0.000447356	0.000285394	0.000204119	4.83125e-05	0.000662342
K00998	0.000356874	0.000637399	0.000372779	0.00119617	0.00109032	0.000192633
K01000	0.00106075	0.00180758	0.000310912	0.000337171	0.000276316	0.00070705
K01002	6.36933e-05	0.000149215	0	4.1529e-06	2.62613e-05	0
K01003	0.000104632	0	6.93452e-06	4.46494e-05	5.58321e-05	6.32853e-05
K01004	0.000203912	5.91966e-05	5.49046e-05	6.08786e-05	0.000158142	0
K01005	2.14114e-05	0	0	1.32206e-05	0	0
K01006	0.000288809	0.000127885	0.000407926	0.000266233	0.000443976	0.0008355
K01007	0.000255636	0.000480819	0.000202513	0.000351235	0.000295978	0.000272209
K01008	0.000131766	0.000127701	0.000185809	0.000237727	0.000260043	5.11576e-05
K01011	0.000342583	0.000560568	0.000344077	0.000520785	0.000502278	0.000738371
K01012	0.000599788	0.000510846	0.00106315	0.000283774	0.000518769	0.00061526
K01014	0	0	0	0	0	0.000123976
K01027	6.2065e-06	3.40085e-05	4.4946e-06	0	0	0
K01028	0.000308635	0.000243298	0.000725449	0.000323595	0.000487748	7.38453e-05
K01029	0.000224058	0.000390876	0.00100189	0.000370179	0.000662705	0.000634265
K01031	0.000123556	6.20003e-05	0.00024652	8.51999e-05	8.28967e-05	7.53222e-05
K01032	0.000174232	0.000192454	0.000170085	4.41511e-05	0.000309013	0.000156058
K01034	1.15155e-05	0	2.52882e-05	2.18729e-05	1.70139e-05	0
K01035	0	0	1.71687e-05	0	3.46631e-05	0.000157571
K01039	9.40299e-05	5.17642e-05	4.79748e-05	4.41101e-05	8.27577e-05	0.000187587
K01040	9.36587e-05	5.73727e-05	7.60044e-06	9.82003e-06	9.19033e-05	0
K01041	9.87177e-05	4.52097e-05	2.3927e-05	2.29995e-05	3.60574e-05	0
K01042	0.000154062	3.84163e-05	0.000121906	3.88858e-05	2.03783e-05	4.60636e-05
K01043	0.000105876	8.95052e-05	2.9605e-05	0.000220004	4.7583e-05	0
K01044	2.17897e-05	7.97201e-05	1.05421e-05	0	2.11547e-05	0
K01046	0.000207502	0.000168808	3.90747e-05	0.000542648	0.000179326	0.000304253
K01048	0.000158603	4.84647e-05	0.000198851	7.41502e-05	1.2899e-05	5.84362e-05
K01051	8.42642e-05	0.000115568	1.01871e-05	2.59978e-05	0	0
K01053	0.000327089	9.72525e-05	0.000579243	0.00129798	0.000918936	0.00117272
K01054	8.6213e-06	0	0	0	0	0
K01055	0.000214418	0.000112551	0.000111813	0.000481203	0.00069085	6.8149e-05
K01056	0.000611041	0.000551667	0.000393278	0.000262	9.24237e-05	0.00100923
K01057	0.000190589	0.000175171	0.000495107	0.000130026	0.00024951	0.000283175
K01058	6.13881e-05	0.000241167	6.38378e-06	0.000311529	0.000231056	0
K01060	4.39027e-05	0	3.19589e-05	8.20874e-06	2.57055e-05	0.000232897
K01061	0.000390255	0.000661624	0.000978519	0.000489885	0.000411836	0.000133452
K01066	4.18501e-05	0.000138025	4.87032e-05	6.24533e-05	4.89392e-05	0
K01067	9.18227e-05	6.70773e-05	0.000146266	0.000208579	0.000168729	0
K01069	0.000318319	0.000383636	0.000152426	0.00017788	8.7712e-05	0.000198943
K01070	0.000352098	0.000107744	0.000513659	0.00016553	0.000445319	0.000260606
K01071	1.05545e-05	0.000116403	0	0	0	0
K01075	7.54345e-05	0	6.67469e-05	2.92628e-05	9.02643e-05	0.000205993
K01076	3.44934e-05	6.34903e-05	0	0	5.09598e-05	0
K01077	0.000274925	0.000267776	4.42346e-05	0.00029254	0.000124077	0.000440285
K01079	0.000348576	0.000504814	0.000481164	0.000455533	0.000443691	0.000182808
K01081	0.000348659	0.000402153	0.000101864	0.000168984	0.000239586	0.000120227
K01082	0.000233573	0.000268012	0.000248438	0.000311038	0.000300129	0.000129631
K01083	2.42531e-05	3.32168e-05	5.70651e-05	5.02364e-05	0.000149503	0
K01085	4.99091e-05	3.91206e-05	0	0	1.03785e-05	0
K01087	0.000175225	0.000275182	0.000151717	6.22501e-05	1.21957e-05	0
K01089	5.66428e-05	0.000266766	0.000111763	2.26057e-05	3.54511e-05	0.000534899
K01090	0.000380006	0.000204511	0.00010278	0.000179748	0.000358308	0.000736677
K01091	0.000988834	0.00094125	0.00103135	0.00108928	0.00189661	0.000228795
K01092	0.000725403	0.00032848	0.000739564	0.000570453	0.000700934	0.00086114
K01093	6.96756e-06	0	6.06419e-05	0	3.041e-05	0
K01095	0.000194172	0.000768533	0.00063248	0.000146898	0	0.000282444
K01096	3.24541e-05	0	0	1.02326e-05	0	0
K01101	7.80372e-05	0	0	0	0	0
K01103	0	0	0	5.60705e-06	0	0
K01104	0.000353884	0.00029572	7.82307e-05	9.29207e-05	7.85376e-05	0.000101525
K01112	3.27851e-05	9.00835e-05	0.000119189	0.000252023	9.57904e-05	0
K01113	0.000227826	0.000223948	0.000621414	0.000547854	0.000330197	0.000496934
K01114	9.99778e-05	0.000212843	0.000546317	5.60854e-05	0.00024127	7.25969e-05
K01115	6.47473e-06	5.29888e-05	2.33049e-06	2.93367e-06	1.39542e-05	0
K01117	0	4.04337e-05	0	0	0	0
K01118	0.000182353	0.000470362	0.000178209	0.000266539	0.000234011	0
K01119	0.000214834	0.000160216	0.000451386	7.59088e-05	1.41076e-05	0.000159064
K01120	4.59521e-05	5.58649e-05	1.10679e-05	1.40255e-05	6.64361e-05	3.33002e-05
K01126	0.000819909	0.00106683	0.000917807	0.000593553	0.000322663	0.000116941
K01128	0	0	1.96428e-05	0	0	0
K01129	0.000529259	0.00047093	0.000627906	0.000311365	0.000760053	0.000659088
K01130	0.000159518	0.000394137	0.000717667	0.000537261	0.000230657	0.00322242
K01131	0	0	0	0	0	3.49354e-05
K01132	0	0	0	0	0	0.000273876
K01133	9.03367e-05	0	6.10358e-05	0.000332577	0.000122274	0.000473286
K01134	5.90816e-06	0	0.000153935	3.80398e-05	8.56483e-06	0.00127618
K01135	0	0	0	5.4499e-06	0	0.000155131
K01136	0	3.20007e-05	8.45679e-06	3.76077e-05	0	0.00026765
K01137	5.85165e-06	3.20476e-05	0	0	0	0.000574388
K01138	5.30231e-05	0.000161337	0.000196133	2.7092e-05	0.000111022	0.00223648
K01139	0.000254659	0.000354382	0.000143726	0.000236792	0.00036091	9.04024e-05
K01141	6.46918e-05	3.54614e-05	3.74985e-05	1.19382e-05	0.000178521	4.24513e-05
K01142	0.00116384	0.00111543	0.000480163	0.00112504	0.00061014	0.000337601
K01143	0	0	0	0	3.49131e-05	0
K01144	8.49281e-05	9.97004e-05	2.6351e-05	5.02621e-05	2.63962e-05	0.000278148
K01146	6.19558e-05	5.69219e-05	0	0	1.51945e-05	0
K01147	5.55135e-05	2.76068e-05	9.48006e-05	9.23906e-06	6.56541e-05	0.000131624
K01150	0.000173603	0.000119715	8.72475e-05	0.000184768	9.59662e-05	0
K01151	0.00013589	0.000213834	0.000169898	9.12261e-05	0	0.000129273
K01153	0.00113951	0.0012743	0.000120471	0.000524919	0.000235514	0.000315896
K01154	0.00104338	0.00193788	3.90057e-05	0.000163925	7.83152e-05	0.000101235
K01155	0.000121188	0.000190407	0	0	0	0
K01156	0.000205108	0.000173722	0.000280196	0.000234323	1.5258e-05	6.87102e-05
K01157	0	5.23385e-05	0	0	0	0.000189729
K01159	0.000444535	0.000746006	0.0016038	0.000310564	8.01465e-05	0.00036509
K01163	1.83746e-05	5.05607e-05	0	0	0	0
K01166	8.89481e-06	0	0	0	2.60501e-05	0
K01167	3.09511e-05	0	0	0	4.63573e-05	0
K01169	0	0	0	1.93244e-05	1.50766e-05	0
K01173	0.000232809	0.000331896	2.50991e-05	0.000104699	0.000138762	0.000114271
K01174	2.3001e-05	0	0	2.18424e-05	0	0
K01175	0.000206578	0.000247072	1.96226e-05	6.72514e-05	0.000157873	0.000476901
K01176	0.000230173	0.000472651	5.41236e-05	2.6441e-05	0.000350176	0.000112918
K01178	4.8599e-05	5.31556e-05	4.2119e-05	2.22196e-05	2.10616e-05	0
K01179	0.000131307	0.000240213	5.29437e-05	0.000466607	0.000297487	0.000816816
K01181	0.000101515	0.000185569	0.000284579	8.75707e-05	1.96785e-05	0.000311288
K01182	0.000140538	3.07768e-05	4.47279e-05	3.09737e-05	0	0
K01183	9.14512e-05	2.77938e-05	1.10128e-05	3.72118e-05	0.000117517	0.000397589
K01184	1.37808e-05	0	0	1.91187e-05	0	0
K01185	0.000194863	0	0.00106825	0.000136885	0.00376174	0.000263476
K01186	0.000120889	8.26609e-05	9.82568e-05	2.30523e-05	0	6.56836e-05
K01187	0.00058746	0.00035705	0.000613039	0.000454943	0.00084909	0.00026188
K01188	0.000189617	0.000272941	0.00061281	0.000529671	0.000252402	6.50555e-05
K01190	0.000303654	0.000380995	0.00114631	0.000193205	8.03039e-05	0.000316406
K01191	0.000118589	1.90368e-05	4.52181e-05	8.22929e-05	7.02179e-05	0.000293604
K01192	0.000103293	6.50955e-05	0.00036088	0.000231349	9.15529e-05	0
K01193	0.000255075	0	4.50549e-06	3.43945e-05	9.02835e-06	0
K01194	0.000114346	0.000142191	0.000454513	4.76163e-06	3.0067e-05	0
K01195	4.84814e-05	2.9482e-05	2.33675e-05	1.97611e-05	7.79544e-06	0
K01197	1.15235e-05	6.31024e-05	0.000362686	9.00194e-05	0	0
K01198	7.64086e-05	0.000160954	8.08183e-05	0.000340529	0.000443021	0.0001154
K01200	4.40849e-05	6.5671e-05	5.77901e-06	0	1.73191e-05	2.60108e-05
K01201	8.04741e-05	3.3919e-05	0	1.14057e-05	0	0
K01206	0.000285559	0.00023811	0.00106545	0.000388926	3.60331e-05	0.000895141
K01207	0.000388591	0.000723206	0.000518356	0.000250369	0.000141321	0.000319422
K01209	0.000115128	0.000365147	0.00063608	0.0004072	0.000123039	0.000119067
K01210	0	3.32729e-05	4.39706e-06	0	7.04745e-05	0
K01212	7.38805e-05	2.88773e-05	8.39185e-05	3.38573e-05	7.63397e-06	3.44445e-05
K01214	4.09212e-06	0	0	0	0	0
K01215	1.17037e-05	0	0	0	0	0
K01216	7.98972e-06	0	0	0	0	0
K01219	0	0	0	0	0	2.83023e-05
K01220	9.20308e-05	3.60394e-05	0	0	0	0
K01222	0.000158144	3.77126e-05	0	1.90766e-05	0	0
K01223	0.000239334	0.000255164	2.89124e-05	0.000159652	0.000125601	4.3661e-05
K01224	3.9996e-05	3.65507e-05	2.41592e-05	6.15754e-06	9.6881e-06	0
K01225	0	0	0	2.33391e-06	0	0
K01226	0.000109255	9.44634e-05	1.24812e-05	4.2275e-05	9.16472e-05	7.52243e-05
K01227	4.5329e-06	0	3.2716e-06	0	0.000104656	0
K01230	0	0	3.79613e-06	1.44392e-05	7.597e-06	0
K01232	2.77959e-05	0.000152472	0	6.4292e-06	1.0109e-05	0
K01234	1.14249e-05	0	0	0	0	3.73585e-05
K01235	3.19687e-05	2.49652e-05	0.000276898	0.0001084	2.63635e-05	0
K01236	9.6154e-05	5.84683e-05	0.000629465	0.000210607	0.00109755	0
K01238	0.000141492	0.000221146	0	3.7006e-05	3.65231e-05	0
K01239	0.000356048	4.89659e-05	6.48121e-05	0.000283128	0.000104278	0
K01241	0.000234273	0.000110109	0.00105289	0.000779173	0.000885337	0.000175871
K01243	0.000506483	0.000364538	0.000161029	0.000239804	4.87189e-05	7.37595e-05
K01246	0.000482157	0.000341773	9.9719e-05	0.000188789	0.0003847	8.33378e-05
K01247	0.000247242	0.000283933	0.000263281	0.000291459	0.000227364	6.87877e-05
K01249	1.88184e-05	0	0	8.82816e-06	1.38024e-05	6.2572e-05
K01250	5.39029e-05	0	0	4.20427e-05	5.26374e-05	5.96275e-05
K01251	0.000523866	0.000552433	0.000525823	0.000459222	0.000263594	0.000661823
K01252	5.96485e-05	0	0	0	7.30473e-05	0
K01253	7.60889e-06	0	0	7.06611e-06	2.21873e-05	0
K01254	0	0	0	4.70167e-06	0	0
K01255	0.000760309	0.000757559	0.00065991	0.000272213	0.00018241	0.00160675
K01256	0.000634964	0.000744585	0.000699181	0.000471214	0.00104332	0.000631744
K01258	0.000380385	0.000281034	5.30927e-06	6.78197e-05	4.26189e-05	9.63715e-05
K01259	0.00057452	0.000987752	0.000529522	0.000957795	0.00198548	0.00131075
K01261	6.45093e-05	0	0	0	0.000105973	0
K01262	0.000732531	0.000523677	0.000341466	0.00125707	0.000573403	0.00116986
K01263	0	2.49667e-05	0	0	6.59129e-06	0
K01264	1.81556e-05	0	0	1.11419e-05	0	0
K01265	0.00109511	0.000471891	0.00149263	0.00118014	0.000838454	0.00152063
K01266	0.000125056	8.58561e-05	0.000113571	0.000639492	0.00015965	0
K01267	3.94077e-05	0	1.90393e-05	0.000236481	3.81698e-05	0.000172475
K01269	0.000265015	0.000117906	5.71667e-05	0.000152601	3.12817e-05	0
K01270	9.00094e-05	0.000140962	0.000130424	5.93092e-06	9.33656e-06	8.43633e-05
K01271	0.00019912	0	0.000806541	0.000320137	7.81747e-05	0.00025263
K01273	0.000296603	0.000308287	5.2438e-05	0.000582012	0.000280889	0.000317834
K01274	2.12233e-05	0	5.13211e-06	0	0	0
K01277	2.27343e-05	4.97091e-05	0	3.73537e-05	0	2.95809e-05
K01278	0.000159903	0.000169934	0.000580147	0.000364689	5.76677e-05	0.000115535
K01281	3.21967e-05	0	3.32013e-06	0	6.6386e-06	0.000149653
K01284	0.000340161	0.000413312	0.000313827	0.000539599	0.000225118	0.000184564
K01286	0.000333571	0.000203446	3.76681e-05	0.000130649	8.64035e-05	0
K01295	0.000227406	0.000208094	0.000401838	0.000527874	0.000309421	4.99919e-05
K01297	0.000225079	0.000594409	0.000268828	0.000556219	0.000145074	0.000119522
K01299	0.000125317	6.86733e-05	4.08431e-05	0.000103948	3.63771e-05	0.000164318
K01301	0	0	0	8.15262e-06	5.15635e-05	0
K01303	4.56263e-06	0	0	0	0	0
K01304	0.000214412	6.58164e-05	8.7265e-06	3.40166e-05	0.000105739	0
K01305	1.52798e-05	4.19503e-05	5.54867e-06	0	0	0
K01308	7.72591e-06	0	0	0	0	0
K01317	0	0	0	4.25918e-05	0	2.76057e-05
K01318	2.83228e-05	0	0	0	0	0
K01322	0.000333296	0.000307993	0.000311806	0.000313063	6.0998e-05	0.000213922
K01338	0.00065883	0.000864134	0.000646507	0.000781127	0.000494128	0.000770985
K01342	7.8099e-06	0	0	7.26106e-06	0	0
K01347	2.2808e-06	0	0	0	0	0
K01356	0.000377895	0.000326199	0.00019029	0.000325801	0.000558889	0.00055581
K01358	0.000798108	0.000987268	0.000410154	0.000861774	0.00107504	0.00216354
K01361	2.87382e-05	1.20432e-05	1.58811e-06	0	0	0
K01362	0.000473508	0.000475384	0.00038673	0.000264903	0.00021324	0.00144549
K01372	5.45721e-05	3.74119e-05	0	0	0	0
K01376	0	0	0	0	0	4.06145e-05
K01387	3.9668e-06	0	0	3.60925e-06	0	2.57405e-05
K01390	2.58927e-06	0	0	0	0	0
K01400	2.6971e-05	0	3.89998e-06	9.89451e-06	7.80632e-06	0
K01406	3.1339e-05	0	3.23089e-06	4.08505e-06	5.81321e-05	0
K01407	4.22378e-05	0	0	3.51408e-05	3.03718e-05	4.55895e-05
K01409	0.000614609	0.000630469	0.000226417	0.00019089	0.00136476	0.0012465
K01412	3.15925e-05	6.92556e-05	4.57674e-06	2.33005e-05	0	0
K01414	0.00017154	0.000390827	0.000474818	0.000182902	0.000529854	0.000558544
K01415	4.47864e-05	2.44792e-05	3.8785e-05	2.86061e-05	1.2923e-05	0
K01417	0.000318643	0.000410849	9.95492e-05	0.000120913	9.97446e-05	0.000696294
K01419	0.0002633	0.000218623	0.000860563	0.000315594	0.000136929	0.000178148
K01420	0.000496065	0.00091245	0.000475615	0.000678569	0.000487793	0.000664669
K01421	0.000258935	2.28171e-05	8.13273e-05	7.60874e-06	4.81548e-05	0
K01422	0.000199547	6.83416e-05	4.51613e-06	5.74626e-05	3.61994e-05	4.08773e-05
K01423	6.39029e-05	0.00011687	5.15116e-06	2.62994e-05	1.03344e-05	0.000327079
K01424	0.000452064	0.000430281	0.000183493	8.93571e-05	0.000127216	0.000749121
K01425	0.000236834	0.000448771	0.000261252	0.000547789	0.000238587	0
K01426	0.0003068	0.00035785	0.000473024	0.000385603	0.000388788	0.000685541
K01427	4.02246e-06	0	2.90022e-06	7.32205e-06	0	0
K01429	0.000156177	0.000193303	0.000141406	1.70581e-05	0.00149117	0.000359212
K01430	0.000258515	0.000618098	1.37106e-05	3.65472e-05	2.79463e-05	0.000384261
K01431	3.75593e-05	4.12394e-05	8.7268e-05	6.97216e-06	1.09486e-05	4.95259e-05
K01433	0.000478344	0.000368753	0.00077426	0.000844518	0.000449318	0.000445665
K01434	0.00020147	0.00032105	0.000345117	0.000164427	0.000677593	0.000136321
K01436	0.000178998	0.000122826	3.24885e-05	0.000173008	0.000119554	0.000196642
K01438	0.000431235	0.000373836	0.000659257	0.000435495	0.000430124	0.000449026
K01439	0.000678909	0.000819092	0.000714968	0.00038766	0.000337029	0.000344232
K01442	0.000136511	0.000328364	0	0	0	0.000169535
K01443	0.00035985	0.000294292	0.000161264	0.000455177	0.000256788	0.000202047
K01444	4.90491e-05	4.49226e-05	2.9718e-05	7.61616e-06	1.19416e-05	5.40591e-05
K01446	9.354e-06	0	0	0	0	0
K01447	0.000165169	0.00025249	0.000347623	0.000214948	0.000282443	0.000243827
K01448	0.000696322	0.000534343	0.000190266	0.000416906	0.000600157	0.000592304
K01449	1.19651e-05	0.000264464	0	0	0	0
K01451	0.000588014	4.08585e-05	0.00126986	0.000296948	0.000488072	0.000147174
K01452	0	4.90783e-05	0	0	0	0
K01453	7.2328e-05	3.96913e-05	2.62434e-05	0.000388748	8.42556e-05	0
K01454	8.79495e-06	0	0	0	0	0
K01455	9.19367e-05	0.000252417	0.000133548	0.000156574	8.93775e-05	0
K01457	8.4673e-05	6.18116e-05	4.49159e-05	0.00013998	0.000596843	0
K01458	1.95007e-05	0	4.9782e-05	9.16616e-06	7.15968e-05	0
K01459	9.49003e-06	0	0	0	2.78495e-05	6.31328e-05
K01460	0	0	3.01832e-05	1.43492e-05	7.55019e-06	0
K01461	0	0	4.48271e-06	0	1.79647e-05	0
K01462	0.0010833	0.000888657	0.00140526	0.00112992	0.00157101	0.000362308
K01463	0.000104296	0	0.000157443	2.98719e-05	0.000105421	0
K01464	0.000249498	0.000140257	0.000370769	0.000436635	0.000371572	8.39332e-05
K01465	0.00103256	0.00113351	0.00115105	0.00127913	0.00146129	0.00155509
K01466	3.2742e-05	3.58997e-05	7.59274e-05	3.62694e-05	5.70804e-05	0
K01467	0.00040674	0.00375954	0.000862839	0.000921649	0.00197529	0.000688231
K01468	0.000298418	0.000319558	0.000375044	0.000107946	0.000159002	0.00028762
K01469	0.000104125	0	0.000174779	0.000122954	1.24529e-05	0.00026151
K01470	0.000144485	0.000113781	7.5362e-06	0.000214146	0.000106302	0.000206753
K01471	6.32087e-06	0	0	0	1.83517e-05	0
K01473	0.000185826	0.000156324	0.000299328	0.00050078	0.00116287	9.30863e-05
K01474	0.000143166	0.000120567	0.000688885	0.000282986	0.000231179	0.000179888
K01477	0.000108969	0.00017099	0	4.34126e-05	0.000124904	0
K01478	0.000286746	4.0355e-05	0.000101399	0.000109089	4.2842e-05	0.00014532
K01479	0.000257443	0.000303603	4.01921e-05	3.44641e-05	9.43421e-05	6.10837e-05
K01480	0.000400386	0.000342616	0.000174918	0.000108207	0.000182407	0.000531281
K01481	0	0	0	9.10799e-06	0	0
K01482	4.03678e-05	0	0	0	0.000103868	0
K01483	0.000188579	0	0.000188089	6.46966e-05	0.000200354	0
K01484	8.92851e-05	0.000226019	0.000174312	0.000457305	0.000159817	0.0001806
K01485	0.000378121	9.45058e-05	0.000200108	0.000609936	0.000238853	0.000113874
K01486	0.000241912	0.000331049	1.98793e-05	8.07262e-05	0.00011143	3.59214e-05
K01487	0.00012563	0.000229721	4.556e-05	0.000155004	0.000274167	0
K01489	0.000301582	0.00030377	0	7.91202e-05	0.000102033	0.000278954
K01491	0.000804987	0.00100263	0.000363346	0.000450018	0.000295383	0.00108425
K01493	0.000269129	0.000298079	0	7.75518e-05	0	0.000364678
K01494	0.000584318	0.000605583	0.000785207	0.000510639	0.000126183	0.000655897
K01495	0.000531693	0.000391648	0.000424055	0.00139386	0.000279597	0.000715009
K01496	0.00041775	0.000357283	0.000237425	4.70197e-05	0.000506402	0.000220391
K01497	0.00016426	0.000120841	8.00668e-05	5.183e-05	0.000129184	0.000220015
K01499	6.18104e-05	0	4.49994e-05	8.25737e-06	0	0.000117132
K01500	1.14849e-05	0	0	0	1.69668e-05	0
K01501	0.000111692	0.000358626	0.00027131	0.000148373	0.000136487	0
K01502	2.54256e-05	9.31869e-05	1.23314e-05	1.5819e-05	8.67507e-05	0.000112243
K01504	1.70543e-05	0	1.24083e-05	0	1.24711e-05	0
K01505	0.000111363	0.000376809	4.98656e-05	7.99876e-06	0.000150362	0
K01506	3.65158e-05	5.02354e-05	6.6501e-06	8.55147e-06	0.000120407	0
K01507	0.00117668	0.00153751	0.000538493	0.000751512	0.000540999	0.00228594
K01510	6.11075e-06	0	0	0	0	0
K01512	0.000205649	0.000104335	0.000111104	5.55809e-05	2.83173e-05	0.000389474
K01515	0.000478416	0.000208897	0.000258608	0.000385017	0.000298716	0.000849563
K01516	0.000577449	0.00033241	0.000370245	0.000905296	0.000267084	0.00137649
K01520	0.000484452	0.000710986	4.19533e-05	0.000110001	0.000212505	0.000193786
K01521	0	0	2.28488e-05	0	1.53495e-05	0
K01523	0.000376508	9.99443e-05	9.3083e-05	0.000300652	0.000108334	0
K01524	0.000661627	0.000534856	0.000575841	0.00062508	0.00116519	0.000961878
K01525	0.000206078	0.000270275	0.000178963	0.000230716	0.000144148	6.53794e-05
K01529	7.91926e-05	3.75826e-05	2.47966e-06	9.37114e-06	5.4455e-05	0
K01531	0.00027628	0.000206653	0.000220925	8.60012e-05	0.000926102	9.81551e-05
K01533	0.00182998	0.00254377	0.000503684	0.00103389	0.00120654	0.000609961
K01534	0.00090965	0.00149173	0.000974985	0.00130779	0.000557895	0.000207131
K01535	7.4646e-06	6.11336e-05	0	0	0	0
K01537	0.000232219	0.000292521	5.6618e-05	3.56782e-05	5.13878e-06	4.6284e-05
K01539	0	0	0	2.97277e-06	0	0
K01546	0.00047304	0.000616633	0.000411417	0.000537856	0.000611707	0.000110445
K01547	0.000304583	0.000416364	0.000501717	0.000391437	0.000384865	6.19822e-05
K01548	0.000149055	0.000137365	9.10916e-05	0.000177884	7.36361e-05	0.000167506
K01551	0.00015433	4.03361e-05	0.000202703	0.000170369	0	0
K01552	0.000166659	0.000191747	4.7467e-05	5.59967e-05	2.53022e-05	0
K01554	0	0	8.50095e-06	3.30998e-05	0.000102963	0
K01555	0.000164103	0.000313189	0.000274361	0.000185029	0.00015579	0.000234804
K01556	0.000239764	0.000193442	0.0005934	0.00011098	0.00018472	4.63967e-05
K01560	0.000348982	0.000124283	0.000156487	0.000128105	0.000132943	0.000226499
K01561	0.00016024	0	2.06117e-05	6.19128e-05	0.000110621	0
K01563	6.50666e-05	0.000153489	3.38676e-05	0.000139448	2.72598e-05	0.00030891
K01564	0	0	0.000194078	2.00946e-05	3.15757e-05	0
K01565	0	3.55693e-05	0	0	0	0
K01567	7.86977e-05	4.80911e-05	1.90946e-05	1.63461e-05	1.27979e-05	0
K01568	1.1088e-05	0	0	5.08892e-06	0	0
K01569	9.10402e-05	4.16548e-05	2.20376e-05	0.000204293	2.21209e-05	0
K01571	6.96693e-05	0	3.78092e-05	0	5.04812e-05	0
K01572	2.24085e-05	4.10043e-05	0	0	0	0.000541608
K01573	1.99674e-05	0	0	0	0	0
K01574	0.00017554	5.69213e-05	5.2782e-05	9.73939e-06	0.000182332	0
K01575	0.000161157	0.000118523	7.85215e-06	0.000213319	0	0
K01576	2.33087e-05	0	2.10834e-05	2.67867e-05	0.000219574	0
K01577	7.79343e-05	0	4.02612e-05	1.02209e-05	0.000137031	0
K01578	3.91971e-05	0	2.84043e-05	0	1.89807e-05	8.57628e-05
K01579	0.000375062	0.000181371	0.000156706	9.5579e-05	0	0.000223932
K01581	0.00030678	0.000161562	9.82036e-05	0.000510057	0.000171044	0.000115844
K01582	6.92933e-05	5.41428e-05	1.78764e-05	7.69782e-05	2.86085e-05	6.4517e-05
K01583	0	0	1.29625e-05	0	0	0
K01584	6.81522e-05	0	0.000390219	8.54017e-05	0.000221071	2.7676e-05
K01585	0.00014492	0.000283179	0.000112211	0.000113785	7.48464e-05	0.00114807
K01586	0.000676981	0.00104458	0.00101799	0.000626708	0.00018472	0.000324777
K01588	0.000402059	0.00023047	0.000805586	0.000213581	0.000144548	0.00122343
K01589	0.000556445	0.000215231	0.000222076	0.000466408	0.000777608	0.000310484
K01590	1.82853e-05	0	0	0	0	0
K01591	0.000540094	0.000642404	0.000557092	0.000690264	3.11943e-05	0.00106209
K01593	3.78059e-05	0	5.47668e-05	1.74252e-05	5.48782e-05	4.13163e-05
K01594	0	0	0	0	0	4.25512e-05
K01595	0.000421145	0.000414343	0.000336321	0.000372472	0.000185688	0.000295212
K01596	0.000177515	0.000285677	0.000181126	0.000234406	0.000437977	0.000136278
K01597	0.000116556	0.00018304	0	0	0	5.50922e-05
K01599	0.000474731	0.000809625	0.0005356	0.000244034	0.000729371	0.000541288
K01601	4.7451e-05	7.43497e-05	1.96586e-05	3.13282e-05	2.95669e-05	8.90891e-05
K01602	9.44253e-05	0	0	0	0	0
K01607	0.000466313	0.000404158	0.00028981	8.45362e-05	0.000848546	0
K01608	0.000108275	0.000148153	7.82856e-06	0.000178767	0.000133197	0.000106073
K01609	0.000457964	0.000392619	0.00032689	0.000748077	0.000269417	0.000339578
K01610	0.000433687	0.00022468	0.000419877	0.000436518	0.000305805	0.000536941
K01611	9.45938e-05	0.000261297	0	6.74986e-05	3.49768e-05	0
K01613	0.000484195	0.000726326	0.000999778	0.000197552	0.000154649	0.000350298
K01615	2.42358e-05	0	0	0	0	0
K01616	1.11393e-05	1.51839e-05	1.60233e-05	1.51037e-05	0	0
K01617	7.20306e-05	5.67212e-05	0	2.91109e-05	6.05593e-05	0
K01618	3.61731e-05	3.97014e-05	0	2.01129e-05	1.05346e-05	0
K01619	0.000323237	0.000297169	4.72507e-05	0.000122267	7.93941e-05	0.00100941
K01620	0.00039726	0.000454865	0.0007463	0.000686641	0.000157221	0.000438038
K01621	0.000116391	9.08382e-05	2.6981e-05	0.000321821	0.000485251	5.39926e-05
K01622	0	0	0	7.30063e-06	0	0
K01623	0.000309239	0.000340194	0.000591784	0.000264404	0.00103483	0.000410219
K01624	0.000576713	0.000480571	9.5405e-05	0.000481857	0.000345296	0.000868974
K01625	0.000200959	0.000326533	0.000129877	0.000146206	0.00174836	0.000874345
K01626	0.000577182	0.000591645	0.000626063	0.00107254	0.00126827	0.00132029
K01627	0.000353052	0.000594221	0.000414924	0.000184448	0.0008067	0.000980039
K01628	0.000149223	6.3383e-05	0.000294062	0.000272478	0.000423931	0.000693554
K01629	2.94986e-05	0	0	0	2.88892e-05	6.5516e-05
K01630	3.11919e-05	0	0.00012909	1.96216e-05	6.12126e-05	0
K01631	7.13847e-05	0.000131472	0.000383492	0.000203837	0.00015841	8.00273e-05
K01632	2.05516e-05	8.98165e-05	0	7.11138e-05	0.000426446	0
K01633	0.000454936	0.000451739	0.000504378	0.00169769	0.000292806	0.000669165
K01634	5.95715e-06	0	0	1.64425e-05	0	3.90014e-05
K01635	0.000122779	4.82345e-05	0	4.919e-05	5.1347e-05	0
K01636	6.3558e-05	9.49225e-05	1.67228e-05	3.71747e-05	1.6745e-05	3.77981e-05
K01637	0.000311627	0.000533835	0.000456311	0.000581142	0.000245181	0.000639105
K01638	0.000287936	0.000350165	0.00107544	0.000879954	0.000609477	0.000278495
K01639	5.58937e-05	0	6.78865e-06	0	0	6.19232e-05
K01640	0.000395452	0.000494471	0.000791972	0.000311252	0.00028963	0.000298266
K01641	0.000133669	0.000115788	0	0	0	9.25673e-05
K01643	7.41102e-05	6.76781e-05	0	0	8.96095e-06	0
K01644	0.000649778	0.000259214	0.000418704	0.000379946	0.000262471	0.000125253
K01646	3.75785e-05	0	0	0	0	0
K01647	0.000643039	0.000922398	0.000689455	0.000582599	0.000617296	0.0014921
K01649	0.000770919	0.000494897	0.000492676	0.000720627	0.000628876	0.0013805
K01652	0.00101698	0.000703592	0.00255021	0.00134929	0.00112475	0.00135135
K01653	0.000524549	0.000535382	0.000659865	0.000491588	0.000205558	0.0003747
K01654	0.000267361	0.000356133	0.000111903	7.545e-05	0.000922901	0.000107117
K01655	0	0	0	0	2.20397e-05	0
K01657	0.000513779	0.000343353	0.000952968	0.00113183	0.00153687	0.00115018
K01658	0.000437238	0.000483587	0.000238232	0.000525005	0.000111115	0.000589829
K01659	0.000169501	8.46189e-05	7.27529e-05	5.01122e-05	0.000146079	5.08409e-05
K01661	0.000288635	0.000211929	0.000869943	9.03803e-05	2.82469e-05	0.000512349
K01662	0.000534457	0.000668299	0.000746601	0.000727017	0.00039001	0.000763493
K01664	7.45094e-05	0.000205997	9.10689e-06	4.74234e-05	3.68087e-05	8.37315e-05
K01665	0.000377418	0.000536775	4.56249e-05	0.000362203	0.000427095	0.000459715
K01666	0.000175103	4.58313e-05	6.06438e-05	6.99803e-05	0.000231553	0.000275902
K01667	4.59392e-05	0.000179896	0	6.05863e-06	9.53472e-06	4.30834e-05
K01668	6.61197e-06	0	0	6.10577e-06	0	0
K01669	0.000574121	0.00152047	0.000462708	0.000327334	0.000252951	0.00135447
K01671	0	4.90728e-05	0	0	0	0
K01673	0.000844147	0.00165506	0.00102359	0.000789279	0.000540792	0.000744403
K01674	9.32372e-05	0	7.56551e-06	5.86392e-05	1.52458e-05	0
K01676	0.000225981	0.000228014	0.000486389	0.000541634	0.000422481	0.000428255
K01677	3.89889e-05	0	4.97658e-05	0	0	0
K01678	3.91584e-05	0	1.91693e-05	7.50478e-05	0	0
K01681	0.000678942	0.000991697	0.0014285	0.00146878	0.000744721	0.000896421
K01682	0.0001904	4.24405e-05	0.000268883	0.000183762	0.00017904	0.000428491
K01684	8.4018e-05	0.000125819	0.000205248	0.000120603	0.000111372	0
K01685	0.000291212	0.000126243	0.00157519	0.000206451	0.000279383	5.05602e-05
K01686	0.000391465	0.00021501	0.000767931	9.46386e-05	5.71175e-05	0.000103386
K01687	0.00109955	0.000628804	0.0025079	0.00120463	0.00151246	0.000929152
K01689	0.000620088	0.000502557	0.000960966	0.000619683	0.000420421	0.00222527
K01690	8.94554e-05	0.000115176	0.000136924	0.000144675	0.000540434	0.000274749
K01692	0.00301387	0.00174197	0.00352536	0.00237061	0.00255526	0.00230493
K01693	0.000383792	0.000136905	0.000335903	0.000709028	0.00108241	0.000584233
K01695	0.000478378	0.000336573	0.000401235	0.000201432	0.000344301	0.000339623
K01696	0.000667926	0.000926556	0.000293013	0.000605723	0.000288675	0.000822021
K01697	0.000365738	0.000340656	9.0078e-05	7.02109e-05	0.000130483	9.07424e-05
K01698	0.00055829	0.001039	0.00114375	0.000513342	0.000389494	0.000796672
K01699	1.63966e-05	0	0	7.02056e-05	7.91145e-06	0
K01702	1.30146e-05	0	6.25968e-06	7.91066e-06	0	0
K01703	0.000636857	0.000918994	0.000549131	0.000452143	0.00048721	0.00101285
K01704	0.000444644	0.000210828	0.000838978	0.000583154	0.00160196	0.000428863
K01706	0.000110586	3.7911e-05	6.01481e-05	0.000210978	0.000392081	4.5445e-05
K01707	3.69118e-05	0	0.000114301	0.000216228	9.4697e-05	0.000183948
K01708	0.000109537	0.000166695	1.76233e-05	1.12057e-05	0.000194194	0
K01709	9.81632e-05	0.000134858	0.000107057	7.62143e-06	3.58493e-05	5.40962e-05
K01710	0.0010908	0.00187645	0.000290681	0.000846311	0.000401599	0.00099182
K01711	0.000583172	0.000767355	0.000430005	0.000688862	0.000287998	0.00130381
K01712	0.000304709	0.000363935	0.000645076	0.000615318	0.000320859	0.000108611
K01713	1.93472e-05	0	7.05464e-06	0	4.26089e-05	0
K01714	0.00130408	0.00112799	0.000991059	0.00163343	0.00117472	0.00204329
K01715	8.31285e-05	0.000286431	0	1.96091e-05	1.52936e-05	0
K01716	0.000203864	0	1.99816e-05	7.83889e-05	0.000101119	9.21384e-05
K01718	2.58837e-05	4.74436e-05	0	8.05903e-06	1.26228e-05	0
K01719	0.000329446	0.000397247	9.02089e-05	0.000679611	0.000227214	0.000412449
K01720	0.000139788	0.00017412	0.000225536	9.96031e-05	0.000156824	0.000166695
K01721	0.000165313	6.52335e-05	1.72974e-05	0.000269601	1.74636e-05	7.93936e-05
K01724	0.000241168	9.59279e-05	0.00012758	0.000389176	0.000311501	0
K01725	0.000117764	0.000245015	2.16924e-05	1.42452e-05	0.000131941	0.000100323
K01726	5.48582e-05	0	1.33211e-05	8.56536e-06	0	0
K01727	5.25835e-05	0	4.05994e-05	3.41342e-06	0	4.86991e-05
K01728	7.23922e-06	0	9.45612e-05	1.34175e-05	0	4.76696e-05
K01729	1.25274e-05	3.43247e-05	0	0	6.36375e-05	0.000205324
K01730	5.24783e-05	0	0.00016874	4.17461e-05	0	0
K01733	0.000739443	0.000618164	0.000873549	0.00103652	0.000594383	0.000416986
K01734	0.00024278	0.000421211	0	1.47232e-05	0.000204325	0.000310894
K01735	0.000687438	0.000702627	0.000441528	0.000416611	0.000513458	0.000739426
K01736	0.00052522	0.000947244	0.000797387	0.000284288	0.000308831	0.00165632
K01737	0.000528714	0.000503152	0.000178226	0.000263731	0	0.00123764
K01738	0.000991002	0.000764897	0.00120212	0.00174641	0.000521554	0.00057621
K01739	0.000406162	0.000121603	4.82454e-05	0.000246574	0.000225934	0.00102186
K01740	0.000679134	0.000388126	0.000502938	0.00030784	0.000257391	0.000418941
K01744	0.000317292	0.000177478	6.56858e-05	0.000549701	0.000347985	0.00042493
K01745	0.000338241	0.000330883	0.00038916	0.000644922	0.000534353	0.000791175
K01749	0.000487715	0.000341449	0.000129125	0.000306886	0.00036355	0.000529421
K01750	0.000460804	0.000143442	0.000778343	0.000503702	0.000801546	5.76307e-05
K01751	4.50267e-05	4.11983e-05	8.17318e-05	6.96499e-06	0	0
K01752	0.000924128	0.000469141	0.000981622	0.000599113	0.00155199	0.000358812
K01753	9.79441e-05	0.000153515	0.000202977	1.29489e-05	5.08951e-05	4.60175e-05
K01754	0.000840559	0.000441266	0.000673727	0.000494669	0.000404546	0.000914767
K01755	0.000562158	0.000394186	0.000904746	0.00025945	0.000341859	0.00102978
K01756	0.000736963	0.000889859	0.000882311	0.000924818	0.000344032	0.00097736
K01758	8.30734e-05	0.000165852	1.09679e-05	4.20668e-05	1.10088e-05	0.000149401
K01759	0.000465608	0.000645654	0.00053585	0.000253192	8.68922e-05	0.000198168
K01760	0.00044194	0.000575694	0.000891917	0.000785521	0.00120084	0.000148141
K01761	0.000125416	0.000202467	0.0010871	0.000444741	0.000118225	0.00019444
K01766	9.63383e-05	0	5.37965e-06	0.00061181	5.39869e-05	9.76723e-05
K01768	0.000397638	0.000265191	0.000115571	0.000195092	0.000525366	0.000505453
K01769	3.10508e-06	0	0	0	0	0
K01770	0.000388549	0.000615159	2.04137e-05	0.000120258	4.13388e-05	0.00103621
K01771	8.23134e-06	0.00013571	5.98535e-06	0	0	0
K01772	0.000834249	0.000687825	0.000351917	0.000567922	0.000792572	0.000883354
K01775	0.000798165	0.00101144	0.000479389	0.000399272	0.0014102	0.000557002
K01776	0.00076522	0.000693498	0.000282564	0.000373208	0.000611557	0.000322482
K01777	8.54344e-06	4.69733e-05	0.000329459	0.000103692	2.49913e-05	0
K01778	0.000523625	0.00101468	0.000261659	0.000364519	0.000270524	0.000451983
K01779	0.00024045	0.000230562	0.000450531	9.8679e-05	0.000138511	0.000139711
K01780	9.21981e-06	0	0	0	0	0
K01781	8.03964e-06	0	0	0	0	0
K01782	0.00023446	0.000376978	0.00019579	0.000411363	0.000159246	0.000478648
K01783	0.000628227	0.000756799	0.000142112	0.000281893	0.000455509	0.000843296
K01784	0.0015223	0.0010877	0.000700951	0.00106829	0.00132107	0.00148159
K01785	0.000454872	0.000446327	0.000183057	0.000673315	0.000201677	0.00107403
K01786	0.000191176	6.20753e-05	0.000164547	5.33173e-05	3.31996e-05	0
K01787	5.906e-05	4.05216e-05	0	2.05412e-05	0	4.86445e-05
K01788	7.92278e-05	0	0	0.000128842	3.34222e-05	0
K01789	8.55013e-06	0	0	1.59657e-05	1.25057e-05	0
K01790	0.000749983	0.000632861	0.000214535	0.000425485	0.000320588	0.000171652
K01791	0.000430297	0.000816435	0.00050589	0.000254602	0.000525087	0.000206615
K01792	6.46152e-05	0	4.70795e-05	2.59556e-05	6.76619e-05	0.000184006
K01795	0.000160618	0.000232365	0.000276736	7.88832e-05	3.70812e-05	0
K01796	7.82967e-05	4.30041e-05	1.7066e-05	2.18408e-05	4.56963e-05	0.000103391
K01797	0.000178304	5.78314e-05	0.000214523	0.000722847	0.000138979	0.000140188
K01799	0.000126965	0.000116693	0.000541112	5.99649e-05	1.55824e-05	0
K01800	0.000188965	6.52461e-05	0.000977492	7.86495e-05	0.000139736	0
K01802	0.00053897	0.00050656	0.00084773	0.00096901	0.00023716	0.000846805
K01803	0.000644123	0.000582285	0.000617158	0.000458761	0.000295456	0.00112946
K01804	5.64791e-05	0.000137559	0	0.000121465	2.73255e-05	4.11441e-05
K01805	0.000248805	0.00023402	0.00023208	0.000223819	0.000196591	0.000421043
K01807	0.00039978	0.000367717	0.000487326	0.000178866	0.000212996	0.000520974
K01808	0.000367638	0.000407934	0.000184192	0.000796846	0.000153767	0.000801712
K01809	0.000522857	0.000385746	0.000612316	0.000319228	0.000170781	0.000412151
K01810	0.000798569	0.00111935	0.00063208	0.00030796	0.000350321	0.000689713
K01811	8.43635e-05	9.70707e-05	0.000246714	0.000627847	7.68626e-05	0.000115493
K01812	0.000273719	0.000146426	0.000512959	0.000234354	0.000184358	0.000438498
K01813	3.5817e-05	7.86129e-05	0	1.32712e-05	2.08569e-05	0
K01814	0.000473175	0.000415229	0.000801693	0.000691442	0.000443726	0.00122325
K01815	0.000148708	5.46171e-05	6.51003e-05	0.000214558	0	0
K01816	0.000327907	0.000169442	0.000329189	0.000231857	0.000195967	0.000205217
K01817	0.000442095	0.000642558	0.00106478	0.000375926	0.00017196	0.000703447
K01818	1.68607e-05	0	3.2522e-05	6.70942e-05	8.13959e-06	0.000367401
K01819	8.62877e-05	0	0	0	0	0
K01820	1.51016e-05	0	2.74148e-05	3.50493e-05	2.20136e-05	0
K01821	0.000385066	0.000239732	0.000463438	4.31037e-05	0.000130848	0
K01822	0	0	0	0	0	0.000108949
K01823	0.000240785	0.000318235	4.21395e-05	0	0.000155528	0.000128229
K01825	9.09099e-05	0.000124235	6.56154e-06	0.000211606	0.000242699	0.000266147
K01826	0.000141672	0	0	4.59764e-05	0.000424771	0
K01829	8.24473e-06	0	0	1.53686e-05	0	0
K01834	0.00131939	0.00175132	0.00128891	0.000860136	0.000411716	0.00180416
K01835	0.000278883	0.000572722	0.00017237	0.000347171	0.000353634	0.000646226
K01838	5.4758e-05	0.000120852	0	1.0367e-05	0	7.3345e-05
K01839	0.000179406	0.000369326	2.17091e-05	0.000138735	2.17878e-05	9.85527e-05
K01840	0.000778144	0.00142122	0.000746834	0.000312892	0.000125451	0.00105228
K01841	0	0	5.58555e-05	2.59153e-05	2.03716e-05	9.2097e-05
K01843	9.25359e-05	7.81112e-05	0.000129107	5.93282e-05	0.00010361	0.000187387
K01844	0	0	0	2.44018e-05	0	0
K01845	0.000905519	0.000687776	0.000772956	0.00054139	0.000162138	0.00119108
K01846	7.21672e-05	0	7.52817e-06	0	0	0.000137685
K01847	0.000324459	0.00033918	0.000289415	0.000322705	8.26885e-05	0.000155366
K01848	0.00012094	3.15362e-05	4.16682e-06	0.000127024	0	7.5342e-05
K01849	9.18695e-05	8.5025e-05	6.77722e-05	2.97382e-05	2.292e-05	0
K01850	1.14273e-05	0	0	0	1.68784e-05	7.66985e-05
K01851	0	0	0	5.96449e-06	0	0
K01854	0.000369556	0.000248439	8.76229e-05	0.000763141	0.000120929	0.000149193
K01856	7.02838e-05	0	0.000141841	5.08234e-05	9.11485e-05	5.15563e-05
K01857	0.000146917	0.000115137	0.000350137	0.000123015	0.000855043	0
K01858	0.000136597	7.89006e-05	4.17334e-05	0.000219801	8.3737e-05	0.000141991
K01860	7.7953e-06	0	0	0	0	0
K01865	0	0	0	2.07241e-05	0	7.33106e-05
K01866	0.000592313	0.000872054	0.000387886	0.000368138	0.000305017	0.000808546
K01867	0.000717676	0.00079749	0.000644767	0.000638173	0.000541647	0.000532977
K01868	0.000668341	0.000637047	0.000735302	0.000838946	0.000592852	0.00135366
K01869	0.000710622	0.000917943	0.000966488	0.000840554	0.000989995	0.000991017
K01870	0.000611603	0.000671278	0.0011343	0.000768634	0.000437177	0.00145974
K01872	0.000551713	0.000606727	0.000916773	0.000362272	0.000297848	0.000944171
K01873	0.000711324	0.000740641	0.000837441	0.000865949	0.000422054	0.00154446
K01874	0.00078917	0.00108628	0.000562861	0.000675939	0.000507886	0.000697293
K01875	0.000666847	0.001105	0.000513863	0.000456292	0.000293046	0.00127905
K01876	0.000577232	0.00092399	0.000444942	0.000559531	0.000260107	0.000497987
K01878	0.000359357	0.000507113	0.00027525	0.000984461	0.000243135	0.000122443
K01879	0.000348556	0.000206029	0.000227853	0.00026251	0.000244832	0.000919982
K01880	0.000299533	0.000257333	5.95054e-05	0.00020524	7.66185e-05	0.000269061
K01881	0.000545824	0.000826774	0.000953775	0.000432366	0.000513303	0.00121569
K01883	0.000680602	0.000656181	0.00065273	0.000517023	0.000896472	0.00123967
K01884	0	0	5.85495e-06	0	0	0
K01885	0.000724689	0.00108005	0.000856517	0.0011665	0.000230732	0.00120911
K01886	0.000328371	0.000492706	0.000225878	0.000359255	0.000222201	0.000207433
K01887	0.000689629	0.000815408	0.00102936	0.00103293	0.000303519	0.00111751
K01889	0.00068332	0.000819673	0.000439424	0.00033599	0.000206296	0.000518636
K01890	0.000574551	0.00064223	0.000737988	0.00041276	0.000690483	0.00107513
K01892	0.000667489	0.000672378	0.000493846	0.000856357	0.000217884	0.000984808
K01893	0.000322449	0.000396857	3.81528e-05	9.72114e-05	2.86836e-05	0.000388836
K01894	0.000270551	0.000102706	0.000890649	0.000174985	0.000205223	0.000248074
K01895	0.00105822	0.00162581	0.00142413	0.00125612	0.00142494	0.00105447
K01897	0.00145217	0.00081207	0.00143665	0.00100079	0.00126512	0.00110708
K01900	0	0	0	6.55237e-06	0	0
K01902	0.000460731	0.000310574	0.000520851	0.000546946	0.000482737	0.000937901
K01903	0.000458897	0.000503961	0.000433277	0.000575446	0.000769527	0.00105958
K01905	6.04869e-06	0	3.50314e-05	0	0	0
K01906	9.40072e-06	0	0	0	0	0
K01907	0.000205264	0.000400926	1.41194e-05	0.000151966	0.000233002	3.18438e-05
K01908	0.000319478	0.000305153	5.49597e-05	0.000297119	8.79691e-05	6.61375e-05
K01909	0	6.12883e-05	0	0	0	3.65875e-05
K01910	5.8491e-05	9.18588e-05	0	0	0	0
K01911	0.000184915	0.000262937	7.44914e-05	3.16642e-05	0.000179275	0.000180075
K01912	0.000355605	0.000152997	0.000637211	0.000212915	0.000375337	0.000504449
K01913	5.10314e-05	0	6.46951e-05	5.88284e-06	0	4.18421e-05
K01914	7.75751e-05	4.73965e-05	0	8.05074e-06	0	0
K01915	0.00155609	0.00068685	0.000678571	0.00182037	0.000977217	0.0016451
K01916	0.000451544	0.000248443	2.63094e-05	0.00029592	0.000727672	0.000359716
K01917	3.00671e-05	0.0001238	0.000109157	6.97692e-06	1.09559e-05	0
K01918	0.000527861	0.000211399	0.000181949	0.000180291	0.000845252	0.000894304
K01919	0.000223394	0.000442031	0.000399948	0.000405922	0.000306161	0.000162688
K01920	0.000273952	0.000221349	0.000450976	0.000705163	0.000164716	0.000479288
K01921	0.000970692	0.000413974	0.000608643	0.000655596	0.000562664	0.000886162
K01922	1.88449e-05	0	0	0	0	6.26637e-05
K01923	0.000712332	0.000442259	0.000556469	0.000821895	0.000575189	0.000869825
K01924	0.000521104	0.000785582	0.00114226	0.00043886	0.000312248	0.000812301
K01925	0.000648869	0.0011004	0.000324883	0.000278098	0.000223625	0.000527277
K01926	0.000104789	0	2.55752e-05	1.10659e-05	0	0.000156451
K01928	0.000499162	0.00109411	0.00042025	0.000333486	0.000162995	0.000858941
K01929	0.000522998	0.000680947	0.000217923	0.000386205	0.000227933	0.000600777
K01932	0	0	3.97454e-06	2.49744e-06	1.58555e-05	0
K01933	0.000673655	0.00054854	0.000296375	0.000612613	0.000303868	0.00121072
K01934	0.00040746	0.000955725	0.000208231	0.000306364	0.000274421	0.000416128
K01935	0.000384635	0.000187356	0.000132441	3.21939e-05	0.000217135	0.00045534
K01937	0.000593465	0.000883438	0.00104638	0.000693683	0.000300548	0.00124375
K01938	0.000340555	0.000155386	8.62257e-05	8.34216e-05	2.46653e-05	0.000408247
K01939	0.000833192	0.000426124	0.000501975	0.00105898	0.000791233	0.0016725
K01940	0.000692666	0.000400153	0.000740836	0.000344705	0.000424764	0.000912442
K01941	0.000119094	0.000210731	0.000236335	0.000236237	9.71116e-05	4.16343e-05
K01945	0.000614126	0.000309818	0.000209948	0.000398634	0.000256818	0.001672
K01947	5.40185e-06	0	0	0	0	0
K01950	0.000456944	0.000668758	0.000476267	0.000277638	0.000115307	0.000346858
K01951	0.000937948	0.000820041	0.000847596	0.00092359	0.000849889	0.00174199
K01952	0.0012369	0.000913809	0.000848696	0.00119069	0.000777479	0.00197524
K01953	0.00081212	0.000918611	0.000583267	0.000417151	0.000242906	0.000636481
K01955	0.000625373	0.000682543	0.000679129	0.000846136	0.000403314	0.00135645
K01956	0.000498437	0.00055605	0.000741193	0.000760186	0.000681706	0.000719757
K01957	5.95356e-06	0	0	0	0	0
K01958	0.00015953	0.000114919	9.74624e-05	0.000125313	8.64289e-05	0.000233388
K01959	1.88717e-05	0	3.18938e-05	5.79846e-06	2.73928e-05	0
K01960	2.69674e-05	2.95187e-05	0	8.40917e-05	0.000140495	0
K01961	0.000594704	0.00103768	0.000421351	0.000418466	0.000157198	0.000577256
K01962	0.000669922	0.00108619	0.000462481	0.000409053	0.000201021	0.000739738
K01963	0.000404666	0.000643177	0.000681091	0.000513447	0.000184416	0.000955007
K01965	0.000165513	0.00010649	0.000210951	0.000244836	7.73571e-05	0.000412307
K01966	0.000263968	0.000197179	0.000112911	0.000414068	0.000530675	0.000235708
K01968	0.000250915	0.000263871	0.000390283	0.00022057	0.000181212	0.000188588
K01969	0.000273951	0.000734184	0.000695942	0.000208994	0.000185844	0.000228832
K01971	0.000799338	0.000730141	0.00143836	0.00135122	0.000699965	0.000416061
K01972	0.000668545	0.000815337	0.000823169	0.000422088	0.000507116	0.000845842
K01974	8.28978e-06	0	1.20571e-05	0.000432784	8.47995e-05	5.48477e-05
K01975	0.000298229	7.17548e-05	8.56764e-05	0.000211123	3.85063e-05	0
K01976	0	0	1.8645e-05	0	0	0
K01989	0.000461545	0.000143675	0.000392978	9.76554e-05	6.37201e-05	0
K01990	0.0015997	0.00133101	0.000304988	0.0006279	0.000313675	0.00154548
K01991	0.000617671	0.000717641	0.000721828	0.000268267	0.000776575	0.000403664
K01992	0.00148916	0.00134898	0.000975589	0.000507678	0.0001795	0.000638893
K01993	0.000382727	0.000514355	0.000792037	0.000261977	0.000248757	0.000450615
K01995	0.00219933	0.000521933	0.00418786	0.00228681	0.00351907	0.000441436
K01996	0.00220972	0.000900816	0.00435294	0.00197765	0.0042688	0.0010203
K01997	0.00305857	0.00133796	0.00486321	0.0034993	0.00316603	0.000518347
K01998	0.00234531	0.00075258	0.00466182	0.00188107	0.00407453	0.00125567
K01999	0.00406634	0.00090108	0.00710697	0.00238156	0.00331622	0.000639346
K02000	0.000284162	0.000210866	0.000178505	0.000520861	0.000380803	0.00015202
K02001	0.000254446	4.66286e-05	0.000296178	0.000158314	0.000483696	0.000224661
K02002	0.000540909	0.000287883	0.000311157	0.000391372	0.000638401	5.78369e-05
K02003	0.00222764	0.00149134	0.00112243	0.00326284	0.000685367	0.00296743
K02004	0.00203411	0.00212387	0.0013348	0.00168906	0.0010593	0.001485
K02005	0.000432515	0.000442581	0.000138341	0.00021071	0.00017085	0.000241462
K02006	0.000950476	0.000408816	0.000180307	0.000392909	0.0019444	0.000328066
K02007	6.48192e-05	0.000119188	4.7379e-05	1.02177e-05	0.00122604	0
K02008	0.000500717	0.000287565	5.3334e-05	0.00084668	0	6.9696e-05
K02009	9.26611e-05	0	0	0	0.000617191	0
K02010	0.000375153	0.000137469	0.000618455	0.000474223	0.000353359	0.00016551
K02011	0.000566401	0.00021708	0.000544937	0.000561877	0.000492251	0.000814737
K02012	0.000765257	0.000231137	0.000789098	0.00123169	0.000565525	0.000835042
K02013	0.0016278	0.00110736	0.00110001	0.00111655	0.00128514	0.000536132
K02014	0.00351626	0.00316642	0.0101375	0.00851137	0.00832585	0.00219065
K02015	0.00197946	0.00147714	0.00162269	0.000865027	0.00380743	0.000430886
K02016	0.00184374	0.000669588	0.000474737	0.00108897	0.00124722	0.000634126
K02017	0.000281522	0.000241942	0.000134492	4.11273e-05	0.000141662	0.000175025
K02018	0.000334183	0.000172734	0.000320368	0.000177421	0.00202925	0.000139555
K02019	8.46101e-05	6.68025e-05	0.000115156	0.000126693	0.00010736	0
K02020	0.000610537	0.000171137	0.000340058	0.000634503	0.000456844	0
K02021	0.000145037	5.11592e-05	0.000442485	2.56429e-05	3.37726e-05	0
K02022	0.000535662	0.00041433	0.000517908	0.000127017	0.000159803	0.000632041
K02023	0.000946417	0.000262139	0.000352566	0.00105083	0.000719756	0.000315238
K02024	9.53712e-05	7.4721e-05	1.48178e-05	1.88934e-05	8.91494e-05	4.47715e-05
K02025	0.00285858	0.000699073	0.000746927	0.00218403	0.00136957	0.00036154
K02026	0.00238528	0.000840561	0.00130776	0.00189924	0.0026464	0.0015237
K02027	0.00267702	0.000596194	0.000950762	0.00153251	0.00129416	0.000625117
K02028	0.00104758	0.000173281	0.00137737	0.0010186	0.000801984	0.000420032
K02029	0.00250217	0.000667184	0.00233442	0.00320265	0.00403496	0.000807651
K02030	0.00167174	0.000762497	0.00102963	0.00115141	0.00108324	0.000859215
K02031	0.00207988	0.000639319	0.0033263	0.00181055	0.00304531	0.00163918
K02032	0.00211437	0.00104798	0.00369123	0.000991063	0.00270338	0.00110271
K02033	0.00290113	0.00134155	0.00336712	0.00261345	0.00474285	0.00155932
K02034	0.00265685	0.00137798	0.00305513	0.00245269	0.00235831	0.001306
K02035	0.00437556	0.00127289	0.00305684	0.00357903	0.00245051	0.00171084
K02036	0.000541853	0.000281747	0.00103005	0.000452953	0.00153394	0.000477691
K02037	0.000567673	0.000527099	0.00123193	0.00087808	0.000641981	0.000633952
K02038	0.000413454	0.000278313	0.00102506	0.000991992	0.000604502	0.000335189
K02039	0.000509373	0.000124978	0.000347865	0.000375829	0.000334257	0.000379683
K02041	0.000336692	5.62328e-05	0.000350083	0.000240412	0.000105049	0
K02042	0.000484153	0.000493258	0.000346042	0.00117471	9.1925e-05	0.000535526
K02043	0.000226967	5.9621e-05	7.90007e-06	3.06675e-05	0.000509756	0
K02044	0.00022558	0.000496459	0.000578307	0.00106436	0.000132188	0.000419297
K02045	0.000297348	0.000272366	0.000186195	3.07956e-05	0.000567243	5.4641e-05
K02046	0.000487412	0.000375843	0.000227525	0.000201609	7.15808e-05	0.000129854
K02047	0.000257501	0.000157537	0.000215548	0.000116411	0.00020994	0
K02048	0.000612303	0.00018702	0.000216551	0.00022226	0.000932744	0.000168963
K02049	0.00217363	0.00112741	0.00184133	0.00311544	0.00208994	0.000779039
K02050	0.00211337	0.00117864	0.00242206	0.00237459	0.00225262	0.000247537
K02051	0.00197999	0.000968483	0.00212978	0.00287214	0.00390012	0.000721951
K02052	0.000498569	8.98274e-05	0.00150343	0.00261181	0.00531296	0.00151335
K02053	0.000792799	0.000107824	0.0002713	0.00242044	0.00172512	0.000130402
K02054	0.000608703	0.000191286	0.00156959	0.000836931	0.000419924	0.00023056
K02055	0.000738629	4.41094e-05	0.000741111	0.00115842	0.00141838	0.000530566
K02056	0.00125113	0.000535834	0.000236096	0.000595406	0.00132521	0.000342158
K02057	0.00205264	0.000921065	0.000670328	0.000828345	0.000918524	0.000332727
K02058	0.000700168	0.000139122	6.75018e-05	0.000362062	0.000419344	0.000167552
K02061	0	0	6.19827e-06	0	0	0
K02062	3.30154e-05	0	0	1.04209e-05	1.62314e-05	0
K02063	6.46504e-05	6.43786e-05	0.000110588	0.000259438	0	0
K02064	0.00010202	9.34812e-05	7.42232e-05	9.52243e-05	1.24327e-05	0
K02065	0.000653451	0.000609352	0.000704356	0.00108873	0.000339922	0.000603458
K02066	0.000593052	0.00186563	0.00100862	0.000459287	0.000414267	0.000813826
K02067	0.000501526	0.000208391	0.00127612	0.00123448	0.000263785	0.000818265
K02068	0.000178747	0.00018498	8.17197e-06	0.000243542	4.94592e-05	0
K02069	0.000249805	0.000114768	0.000395301	0.000206263	0.000260445	0.000139069
K02071	0.000651154	0.000557876	0.000319899	0.000213064	0.00102629	5.59934e-05
K02072	0.0004625	0.000446976	8.46458e-05	0.000384442	0.000358806	0
K02073	0.000717372	0.000439158	0.000479842	0.000965937	0.000585721	0.000265704
K02074	0.000344911	5.76264e-05	0.00019849	3.94615e-05	0.000184635	0.000488864
K02075	0.000394362	0.000217244	0.000258933	0.00026895	0.000202781	0.000197095
K02077	0.000373378	0.00014671	7.76745e-05	3.32649e-05	0.000924258	0
K02078	0.000811009	0.000340251	0.000831098	0.000669459	0.000679389	0.000851179
K02079	0	4.3696e-05	0	0	1.16107e-05	0
K02080	0	0	1.56378e-05	1.01134e-05	1.57639e-05	0
K02081	4.11841e-05	0.000113509	7.51804e-05	0.000242739	0	0
K02082	2.29427e-05	4.19927e-05	5.55429e-06	2.84143e-05	3.34544e-05	0
K02083	5.71983e-05	3.9231e-05	3.6313e-05	1.3245e-05	3.12245e-05	0
K02086	5.63646e-05	6.22282e-05	0	0	0	0
K02093	0	0	0	0	0	9.67182e-05
K02095	0	0	0	0	0	9.67312e-05
K02096	0	0	0	0	0	6.86294e-05
K02099	5.72554e-05	0	0	0.000170243	0.000238073	0
K02100	1.30811e-05	3.58564e-05	0	0	9.50177e-06	0.000171734
K02106	8.88126e-05	0.000112406	0.00061425	0.000189496	0.000188756	0
K02108	0.000700226	0.000737909	0.000421069	0.000553526	0.000484832	0.000756331
K02109	0.000539877	0.000298993	0.000317433	0.00099848	0.000140542	9.1461e-05
K02110	0.000203854	0	4.55893e-05	0.000653139	0.000248489	0.000142709
K02111	0.000431164	0.000565575	0.000483621	0.00095603	0.000933679	0.00139226
K02112	0.000547321	0.000392908	0.000618513	0.00108847	0.000530034	0.00200999
K02113	0.000240751	7.00897e-05	0.000223131	0.000327108	0.000300727	0.000342146
K02114	0.00041772	0.000357257	0.000367982	0.000203736	0.000217013	0.000550935
K02115	0.000520364	0.000208355	0.000717261	0.000488375	0.00081898	0.000943986
K02116	0.000211013	0.000451286	9.59747e-05	4.75477e-05	0.000243752	0
K02117	4.83035e-05	8.81187e-05	7.76027e-06	0	0	0
K02118	7.98742e-05	0.000109489	4.82462e-06	6.14814e-06	0	0
K02119	1.66616e-05	4.57901e-05	0	0	0	0
K02120	8.38458e-05	0	8.77615e-06	0	0	8.05988e-05
K02121	1.35333e-05	0	0	0	2.01339e-05	0
K02122	1.81109e-05	0	0	0	0	0
K02123	4.45216e-05	0.000135283	3.57333e-06	2.26281e-05	0	0
K02124	4.68368e-05	0	0	1.51882e-05	0	0
K02160	0.00042252	0.000404083	0.000139512	7.0433e-05	8.70138e-05	0.00019845
K02164	0	0	0	1.21072e-05	0	0
K02167	0.000174213	0	0	0.000368342	0.000995967	0
K02168	0.00033232	0.000468234	0.000574766	0.000364085	0.000378453	6.56583e-05
K02169	0.000140203	0.000275898	9.50076e-05	2.82863e-05	0.00029441	0
K02170	9.53448e-05	0.000233686	1.54804e-05	8.0061e-05	0.000249647	0.000141666
K02171	1.64695e-05	0	0	0	0	0
K02172	5.57576e-06	0	0	0	0	0
K02182	6.54836e-05	6.52154e-05	0.000555843	0.000191693	0.000112206	0.000194869
K02188	9.36779e-05	8.57507e-05	0	4.35465e-05	3.4168e-05	0.000412296
K02189	0	0	7.3577e-06	0	5.92855e-05	0
K02190	9.59404e-06	0	0	0	0	0
K02192	2.16985e-05	0	0.000210853	0.000109507	6.64318e-05	0
K02193	0.000346819	0.000264333	0.000210291	1.13872e-05	0.000176963	0.000321864
K02194	0.000334629	0.000318607	7.60222e-05	4.38406e-05	5.11493e-05	0.000154975
K02195	0.000579191	0.000987158	0.000900093	0.000238665	0.000449692	0.000211171
K02196	0	0	1.64713e-05	0	0.000269981	0
K02197	0.000291291	0.00072709	0.000214557	0.000168975	0.000369673	9.91879e-05
K02198	0.000488791	0.000989085	0.00052955	0.000379969	0.000162418	0.00035033
K02199	0.000274134	0.000361242	0.00077643	0.00016262	0.0001745	0.000353111
K02200	0.000369643	0.000479832	0.000278173	0.000555483	0.00019233	0.000145569
K02203	3.67732e-05	0.000271048	0	0	5.44695e-05	0
K02204	0.000158507	0.000193741	0.000493618	0.000485788	0.000605879	0.000175199
K02217	0.000137678	0	1.01245e-05	2.64972e-05	0	9.34142e-05
K02221	0.000324042	0.000450441	0.000227509	0.000173992	0.000364922	0
K02224	0.000133115	0.000109482	0.000371472	7.99204e-05	0.000125747	4.37123e-05
K02225	7.67884e-05	4.69099e-05	0.000105532	0.000167268	2.4957e-05	0
K02226	3.69595e-05	6.81117e-05	0	0	7.30095e-05	0
K02227	0.000115805	0	5.18906e-05	5.00044e-05	0.000130451	0
K02228	5.25108e-05	0	5.37024e-05	7.93259e-05	0.000123704	0
K02229	4.26487e-05	0	9.79811e-05	0.000157977	0.000124153	0
K02230	0.000119972	0.000133789	0.000201965	0.000216822	0.000531888	0.00017596
K02231	0.000102649	0.000141983	0.000254275	0.000208753	7.6173e-05	0
K02232	0.000123645	0.000101623	6.71525e-05	0.000284758	9.86749e-05	8.10324e-05
K02233	0.000147578	0.000348763	0.000300338	3.98198e-05	0.000465681	7.04643e-05
K02234	8.23267e-05	4.52441e-05	2.39453e-05	0.000145778	0.00015637	0.000326734
K02236	3.47132e-05	0	0	0	0	0
K02237	0.000362371	7.43204e-05	0	0.000231997	0.000119756	0.000272746
K02238	0.000653282	0.000469339	0.000471726	0.000200472	9.64089e-05	0.000248428
K02239	1.98371e-05	0	0	0	0	0
K02240	7.10328e-05	3.89732e-05	0	0	0	0
K02242	8.26402e-05	6.52203e-05	0	0	0	0
K02243	9.64595e-05	4.82296e-05	6.38328e-06	0	0	0
K02244	8.55208e-05	9.40427e-05	0	0	0	0
K02245	0.000145102	0.00010114	0	0	0	0
K02246	6.13682e-05	0	0	0	0	0
K02248	2.96048e-05	0	0	0	0	0
K02249	1.69172e-05	0	0	0	0	0
K02255	0	0	0	1.33759e-05	0	0
K02258	0.000297565	0.000328824	0.000183112	0.000192602	8.80453e-05	0.000640511
K02259	0.000410864	0.000541903	0.000394347	0.000290986	0.000252112	0.000380451
K02274	0.000908397	0.000644678	0.00117214	0.00129238	0.000600926	0.0018327
K02275	0.000682171	0.000395059	0.000522929	0.000840079	0.000354981	0.00137018
K02276	0.000775464	0.000653511	0.000527421	0.000947176	0.00207928	0.000792781
K02277	1.69529e-05	0	1.25484e-05	3.32497e-05	0	0.000116756
K02278	0.0004044	7.72798e-05	0.000338526	5.37317e-05	6.23271e-05	0
K02279	0.000212245	0	0.00032362	5.43846e-05	0.000113307	6.42264e-05
K02280	0.000323963	0.000104443	0.000285292	0.00017572	0.000525672	0
K02281	0.000167205	6.15218e-05	0	0	3.28973e-05	0
K02282	0.000255625	0.000120251	0.000498273	0.000291146	0.000510601	0
K02283	0.000349548	0.000108477	0.000568803	0.000602885	0.000651642	0.000173212
K02288	0	0	0	0	1.38758e-05	0
K02290	0	0	0	0	0	7.08259e-05
K02291	0.000175824	5.09322e-05	0.000269713	0.000112771	0.000122106	0.000184487
K02293	0	0	0	5.80215e-06	0	0.000206361
K02294	8.98415e-05	6.19884e-05	0.000172531	0.000106478	3.31521e-05	0.000150614
K02297	0.000247112	0.000339805	0.00145849	0.000511675	0.000387612	5.85339e-05
K02298	0.000244617	0.000481617	0.00186573	0.000970943	0.00045943	3.18777e-05
K02299	0.000146526	0.000404979	0.00117255	0.000791754	0.00182645	0.000164504
K02300	0.000102529	9.51397e-05	0.00134112	0.000117398	0.00280544	0
K02301	0.000434514	0.00139464	0.000745043	0.000440754	0.000583566	0.000240405
K02302	0.000297366	0.000194225	0.00047254	0.00015733	0.000474	0.000232943
K02303	0.00013274	5.62773e-05	0.000186362	0.000125118	7.50952e-05	6.81516e-05
K02304	4.66472e-05	6.44115e-05	0	0	0	0
K02305	1.3736e-05	0	0	0.000502191	6.13497e-05	0
K02312	3.45427e-05	0	0.000245758	3.17451e-05	8.34164e-06	3.76579e-05
K02313	0.000929975	0.00136434	0.000446123	0.000580376	0.000304463	0.000730852
K02314	0.000911877	0.000908702	0.00394042	0.000958565	0.0153047	0.00158944
K02315	0.000107844	5.40034e-05	0.00254598	0.000110633	0.0127879	0
K02316	0.000600169	0.000806629	0.000319647	0.00030397	0.0004417	0.000584133
K02317	0	0	0	0	1.98205e-05	0
K02334	0.000286904	0.00031596	0.000669387	0.000197579	0.000547405	0.00070007
K02335	0.000843355	0.00105146	0.000566221	0.000493722	0.000504529	0.00122382
K02336	5.07546e-05	0	2.74572e-05	4.62474e-05	0.000109747	0.000274777
K02337	0.000844016	0.0010065	0.000539846	0.00081049	0.000538583	0.00117289
K02338	0.000716492	0.000821708	0.000572104	0.000519924	0.00048257	0.000831928
K02339	0.000194263	0.000497609	4.40614e-05	4.34394e-05	0.000178722	0
K02340	0.000459387	0.000280628	0.000167113	0.000182638	0.000248821	0.000338049
K02341	0.000580209	0.000619077	0.000226886	0.000566322	0.000164721	0.000114785
K02342	0.00086237	0.00113356	0.00085066	0.000663489	0.000575768	0.000522279
K02343	0.00048584	0.00062886	0.000249196	0.000493027	0.000264454	0.000613618
K02344	3.10853e-05	0	0	0	0	0
K02345	4.15832e-05	0	0	4.17384e-05	0	0
K02346	0.000558506	0.00109227	0.000511214	0.000419295	0.000435095	0.000252367
K02347	0.000111507	6.10444e-05	4.03243e-06	0.000266167	0	0.000728789
K02348	0.000204565	8.10556e-05	0.000333675	0.000169571	2.18196e-05	0.000199064
K02351	7.01487e-05	0.000174761	0.000124734	6.46926e-05	3.70372e-05	8.36602e-05
K02352	6.2525e-05	0	0	8.35771e-06	0	0
K02355	0.000728449	0.000689302	0.000718053	0.00107059	0.000444922	0.00179335
K02356	0.000644841	0.000570896	0.000539625	0.000259292	0.000229741	0.000958665
K02357	0.000518755	0.000264503	0.000434298	0.000351918	0.000126912	0.000511536
K02358	0.000794	0.00106915	0.00103876	0.000903703	0.000698674	0.00320975
K02361	0.000152697	0.000209611	8.87188e-05	1.41825e-05	0	0.000100729
K02362	2.27923e-05	6.29199e-05	0	0	6.73225e-05	0
K02363	2.91771e-05	6.39158e-05	1.26682e-05	0	8.45733e-06	7.63672e-05
K02364	4.35839e-05	4.75356e-05	2.50833e-05	2.36538e-05	2.50207e-05	0
K02366	0	0	0	4.52228e-06	0	0
K02371	0.000248766	0.000439855	0.000284628	9.97302e-05	5.20379e-05	0.000294708
K02372	0.000487332	0.000308643	0.000348243	0.000469384	0.000248914	0.00217445
K02377	0.000238329	0.000436973	8.35409e-05	0.000198105	0.000116305	0.00023418
K02379	0.00029835	5.47914e-05	0.000217697	0.000233991	0.000277684	0.000132594
K02380	5.61744e-05	0.000103075	0.000211525	1.75638e-05	1.37315e-05	0
K02381	1.71364e-05	0	0	0	0	3.73561e-05
K02386	0.000160135	0.000117759	4.68075e-05	3.02689e-05	0.000393194	0
K02387	0.000236978	0.000175584	0.000349987	0.000200023	0.000307955	0
K02388	0.000277583	0.000171296	0.000739626	0.000494517	0.000415674	0.000105444
K02389	0.000202201	6.57174e-05	0.000278825	0.000373591	0.000140769	0.000320017
K02390	0.000246572	0.000109621	0.00054101	0.000326254	0.000222762	0.000306382
K02391	0.000204283	0	0.000440051	0.000498134	0.000142595	7.19403e-05
K02392	0.000360094	0.000226847	0.00142735	0.00127096	0.000635764	0.000206083
K02393	0.00020069	0	0.00024466	0.000591714	0.00027969	0.000672642
K02394	0.000198541	0.000218131	0.000507875	0.000665016	0.000266612	0.000104923
K02395	0.000109522	0.000164567	0.000196159	0.000477926	0.000204854	0
K02396	0.000235863	0.000180147	0.000368882	0.000538558	0.000349377	0.000143342
K02397	0.000155646	0.000128223	0.000175265	0.000491931	0.000170297	0.000154115
K02398	3.71415e-05	0	8.27511e-05	0.000183896	2.81162e-05	0
K02399	0.000105635	0.000167543	1.11274e-05	0	0.000158005	0
K02400	0.000285292	0.000233995	0.000436033	0.000491021	0.000212858	0.000154815
K02401	0.000237681	0.000174084	0.00032241	0.000176895	0.000277522	0.000156995
K02402	5.11838e-05	7.07934e-05	0	1.22434e-05	0	0
K02403	7.00817e-05	0	2.59673e-05	0	0.000132144	0
K02404	4.09725e-05	0	0.000708055	0.00140164	0.00266126	0.000224418
K02407	7.65317e-05	0.000161216	0.000532566	0.00010287	0.000460816	0.000500895
K02408	0.00016136	9.99443e-05	0.000332439	5.30562e-05	0.000216669	0
K02409	0.000138897	0.000126771	0.000217753	0.000159587	0.000234818	0.000227167
K02410	0.000169958	9.34397e-05	0.000680076	0.000563152	0.000223688	0.000281389
K02411	7.51206e-05	0.000118385	7.05868e-05	0.000456557	0.000158131	0
K02412	0.000189837	3.71814e-05	6.88173e-05	0.000188003	0.000167576	0.000445526
K02413	2.97386e-05	0	0	0	8.88954e-05	0
K02414	2.67465e-05	0	1.9388e-05	0	0.000106906	0
K02415	0.000264883	7.72593e-05	0.000194857	0.000429732	0.000477711	0
K02416	0.000146008	0.000141675	0.000449978	0.000641647	0.000314093	0.000113805
K02417	0.000290282	0.000418843	0.000240744	9.65091e-05	0.000131025	8.51781e-05
K02418	4.47841e-05	8.28483e-05	0	1.44637e-05	0.000111581	0
K02419	0.000294626	0.000290106	0.00026904	0.000268272	0.000139445	7.03318e-05
K02420	0.000215505	0.000218961	0.000160386	0.000253771	0.000327448	0
K02421	0.000218186	0.000114558	0.000128996	0.000107836	0.000168209	0.000277614
K02422	9.38011e-05	8.68538e-05	0.000103864	7.60539e-05	0.000140568	0.000107002
K02423	1.71612e-05	0	0.00012708	1.68501e-05	0	0.000118307
K02424	2.03148e-05	0	1.48295e-05	3.82849e-05	5.97515e-05	0.000338895
K02425	2.66905e-05	0	0	1.28101e-05	0	0
K02426	0.000335082	0	0.000449363	0.000340027	0.000113965	0.000208101
K02427	0.000124825	0.000375887	0.000274022	7.5366e-05	0.000167562	0.000456818
K02428	0.000440464	0.000661893	0.000189939	0.000216772	0.000632724	0.000133508
K02429	0.000273356	0.000461416	0.000335548	0.000311378	0.000112184	0.000461065
K02430	2.15008e-05	0	0	0	0	0
K02431	0.00021218	0.000168281	6.7061e-05	5.88167e-05	4.5349e-05	0.000827999
K02433	0.000769563	0.000567181	0.000782503	0.000859239	0.000657472	0.00148526
K02434	0.000502293	0.000662095	0.000787596	0.00060975	0.000350782	0.00112595
K02435	0.00037377	0.000417183	0.000416481	0.000740778	0.000311369	0.000908411
K02436	0	5.76362e-05	0	0	0	0
K02437	0.000416075	0.000444771	0.000319197	0.000187253	0.000264136	0.000877764
K02438	0.0003964	0.000352774	0.000841793	0.000980666	0.00107112	0.000449932
K02439	8.9011e-05	0	0	5.2641e-05	8.06407e-05	0.000123099
K02440	0.000310685	0.000228364	0.000234449	0.000195394	0.000304809	6.91681e-05
K02441	0.000108763	5.44702e-05	7.21379e-06	4.65123e-05	0.000130749	0.00039538
K02442	1.73814e-05	9.68136e-05	0	0	2.62063e-05	0
K02443	2.59545e-05	7.18155e-05	0	0	0	0
K02444	0.000280815	0.000229357	0.000455759	7.85126e-05	0.000214314	6.94788e-05
K02445	0.000102449	0.000262211	2.97139e-05	0.000732521	0.000198637	0.000134675
K02446	0.000207442	4.75299e-05	0.00126433	0.000613641	0.000328799	0.000400955
K02448	1.52667e-05	0.000111357	0	5.59111e-05	8.09264e-05	3.31875e-05
K02450	1.90567e-05	3.48143e-05	2.30074e-05	3.5144e-05	0	4.16619e-05
K02452	4.35593e-05	0.000300399	3.18449e-05	1.03048e-05	0	0.000145821
K02453	0.000266035	0.000433793	0.000188692	0.000362371	0.000552509	0.000820278
K02454	0.00036056	0.000485616	0.000894088	0.000701347	0.000505558	0.000619041
K02455	0.00023066	0.000490132	0.000291696	0.00129782	0.000184318	0.000343285
K02456	0.000253169	0.000165291	0.000450041	0.000317373	0.00040068	0.000406302
K02457	0	7.49408e-05	9.9455e-06	2.60052e-05	0.000120782	0
K02458	0.000144484	0.000267732	0.000142331	3.13176e-05	0	0
K02459	0.00017588	0.000323842	0	0.000579762	0.000260044	7.8807e-05
K02460	0.000139425	0.00014377	0.000285415	0.000407175	0.000624875	0.000231064
K02461	0.000111784	0.000245451	6.49237e-05	0.000636133	0.000369223	0.000294717
K02462	8.09563e-05	0.000149449	1.98332e-05	0.000414813	0.000140496	0.000182861
K02463	0.000117206	5.87647e-05	0	6.04144e-05	4.70893e-05	0
K02465	1.66668e-05	0	0	0	0	0
K02466	6.69107e-05	0	0	1.63819e-05	0	0
K02467	4.42955e-05	0	0	0	0	0
K02468	4.17612e-05	0	0	0	0	0
K02469	0.000768394	0.000792191	0.00073477	0.000966412	0.000790379	0.00193299
K02470	0.000772182	0.000863906	0.000632258	0.00107976	0.000469135	0.00176244
K02471	0.00034583	0.000203811	0.000703834	0.000356064	0.000223233	0.000312603
K02472	0.000121118	0.000273639	0.000480718	0.000316715	2.07412e-05	0
K02473	0	9.05345e-05	0	7.6766e-06	0	0
K02474	0.00021179	0.000309852	0.000261183	0.000235285	0.000328763	0
K02476	1.19243e-05	0	4.31551e-05	5.48557e-06	7.78018e-05	0
K02477	0.000268485	0.000414657	0.000353199	0.000162458	3.16502e-05	0.000143708
K02478	0.000107417	0.000130753	2.59173e-05	8.78529e-05	8.65278e-06	0
K02479	3.46082e-05	6.37054e-05	0	0	0	0
K02480	2.07204e-05	0	3.00529e-05	1.27773e-05	1.00462e-05	0
K02481	3.34777e-05	0	9.22171e-05	5.56727e-05	3.8928e-05	8.7963e-05
K02482	1.06878e-05	0	7.72643e-06	4.89972e-06	0	0
K02483	0.00107253	0.00110994	0.00234547	0.00241437	0.00128601	0.00104858
K02484	0.000329551	0.000110641	0.000190147	0.000111863	0.000615925	8.83691e-05
K02485	7.5516e-05	5.19679e-05	0	0	0	6.27821e-05
K02486	4.06737e-06	0	0	7.40565e-06	6.44612e-05	2.64049e-05
K02487	8.82272e-05	7.51608e-05	0.000182423	0.000304004	0.000312448	7.118e-05
K02488	9.29685e-05	7.84802e-05	5.70765e-05	7.2865e-05	0.000104106	0.000188291
K02489	2.29859e-06	1.2524e-05	8.25797e-06	8.28879e-06	0	1.48056e-05
K02490	0	0	1.22089e-05	0	0	0
K02491	4.79642e-06	0	0	0	0	0
K02492	0.000339085	0.000465084	0.000307478	0.000372788	0.000400948	0.000697213
K02493	0.000537582	0.000211449	0.000398982	0.000225418	0.000450908	0.000638942
K02494	0.000121958	0.000134828	3.5759e-05	6.97707e-05	0.000126427	0
K02495	0.00108658	0.00110563	0.000610917	0.00112005	0.000534323	0.000994877
K02496	8.36633e-05	0	0.000110469	0.000508541	8.87116e-05	0.000100332
K02498	9.90689e-05	7.76479e-05	4.10682e-05	0.000484831	0.000164779	9.31257e-05
K02499	9.5702e-05	0	0	6.82697e-05	0	9.70057e-05
K02500	0.000625612	0.000689839	0.000373165	0.000492019	0.000721366	0.000835954
K02501	0.000531213	0.000400338	7.96276e-05	0.000322087	0.00033956	0.000325097
K02502	0.000215505	4.2265e-05	7.82666e-05	6.436e-05	0.000157148	0.000609435
K02503	0.000405485	0.00027056	0.000155836	0.000237539	9.74221e-05	0.000333955
K02504	7.23602e-05	0.000144259	4.76735e-06	3.64406e-05	0.000640364	4.31879e-05
K02505	5.2412e-05	4.11039e-05	0	4.16911e-05	1.09121e-05	0
K02506	0	0	4.9575e-05	0	0	0
K02507	5.8468e-05	8.02222e-05	5.30441e-06	0.000101634	2.12898e-05	0
K02508	9.38786e-06	0	0.000431065	0.000554845	0.00115668	0.000561816
K02509	0.000121914	0	0.000103828	0.000354213	0.000358586	6.77937e-05
K02510	0.000277733	0	0.000450653	0.0002813	0.000211879	0.000137361
K02511	6.70387e-06	0	4.85966e-06	0	2.92331e-05	4.40379e-05
K02517	0.00054972	0.000806716	0.000253636	0.000240354	0.000295426	0.000121719
K02518	0.000612539	0.00212945	0.000662327	0.000254927	6.4535e-05	0.00133552
K02519	0.000396985	0.000318821	0.000594751	0.000867235	0.000297022	0.00108561
K02520	0.000463419	0.000586407	0.000787826	0.000851024	7.87144e-05	0.000716935
K02521	4.71927e-05	0	0	0	0.000373863	0.000188327
K02523	0.000453272	0.000719076	0.000742312	0.000244385	0.000191349	0.000462278
K02525	8.38174e-06	0	0	0	9.80194e-05	0
K02526	5.22137e-05	4.78577e-05	3.80029e-05	8.13194e-06	1.27348e-05	0
K02527	0.000324305	0.000580178	0.000107399	0.000117477	9.23365e-05	0.000927695
K02528	0.000649611	0.000433752	0.000445181	0.000342538	0.000130134	0.000787004
K02529	0.00157542	0.000648375	0.000747659	0.00166634	0.00107158	0.000669295
K02530	4.19992e-05	5.78949e-05	0	0	0	0
K02532	5.76044e-05	0.000118537	0	0	0	9.48134e-05
K02533	0.000259059	0.000171377	0.000113513	5.86552e-05	0.000228749	0.000138423
K02535	0.000367767	0.000740234	7.83859e-05	0.000554062	0.000170799	0.000892973
K02536	0.000394615	0.000646143	0.000183215	0.000281956	0.000196383	0.000444621
K02538	2.79495e-05	3.06024e-05	0	0	0	0
K02546	1.65224e-05	0	2.44379e-05	0	0	0
K02547	6.0498e-06	0	0	0	0	0
K02548	0.000202315	0.000354271	0.000348398	8.61773e-06	0.00010784	0.000122191
K02549	0.000125252	9.17953e-05	1.21464e-05	1.55745e-05	0.000195279	0.000110525
K02550	0	3.12584e-05	0	6.29395e-05	0	0
K02551	0.000311599	0.000243687	4.42674e-05	7.15132e-05	2.4171e-05	0.00021819
K02552	9.57851e-05	7.50484e-05	4.96101e-06	6.3262e-06	2.98484e-05	0.000179887
K02553	0.000141279	0.000156631	0	4.08718e-05	2.10617e-05	0
K02554	3.02025e-05	0	0	4.74078e-05	2.96022e-05	0
K02556	0.000401737	0.000332049	0.000410471	0.00109708	0.000280525	6.69833e-05
K02557	0.00054655	0.000611834	0.000459	0.000199738	0.000353132	0.000123125
K02558	0.000286181	0.00040141	3.85921e-05	8.60628e-05	0.000241807	0.000349677
K02560	1.77047e-05	0	0	0	0	0
K02562	2.57141e-05	0	9.43714e-06	0	1.90835e-05	0
K02563	0.000513906	0.000838205	0.000577804	0.00020182	0.000222755	0.000583713
K02564	0.000330784	0.000643008	1.41916e-05	0.000283492	0.000457181	0.000583135
K02565	2.94896e-05	0	0	6.83731e-06	0	0
K02566	0.000104022	0.000172046	3.7986e-05	6.87099e-05	9.18637e-05	0
K02567	3.57926e-05	0	0.000194966	6.15178e-05	1.71844e-05	7.74229e-05
K02568	2.90513e-05	0	0.000149777	0	0	9.8905e-05
K02569	6.16944e-05	0	0.00016285	2.35493e-05	1.82818e-05	0.000332664
K02570	7.57068e-05	0	0.000239131	0	0.000286909	0
K02571	4.6603e-05	0	6.99037e-05	0	0	0
K02572	1.40862e-05	0	0	0	6.29895e-05	0
K02573	1.08717e-05	0	0	0	0	0
K02574	0	0	0	0	1.40536e-05	0
K02575	0.000494165	0.000988649	0.000411449	0.000604557	0.000135881	0.000526346
K02584	1.73602e-05	9.50672e-05	1.67483e-05	1.06379e-05	2.51562e-05	3.78567e-05
K02585	0	0	0	0	3.20847e-05	0
K02586	1.23896e-05	0	0	1.71213e-05	1.7978e-05	0
K02587	0	0	0	5.70624e-06	0	0
K02588	1.94769e-05	5.36372e-05	0	0	0	0
K02591	6.46888e-06	0	4.68709e-06	5.96882e-06	2.81861e-05	0
K02592	0	0	0	0	9.59204e-06	0
K02593	0	0.00012189	0	0	0	0
K02594	0	0	0	0	2.27961e-05	0
K02595	0	0	0	0	2.61348e-05	0
K02598	1.01345e-05	5.58506e-05	1.47953e-05	9.54833e-06	0	6.76187e-05
K02600	0.000465455	0.000392923	0.000597505	0.000596985	0.000552506	0.00127269
K02601	0.000700814	0.000775387	0.000187011	0.0008166	0.000623876	0.00172088
K02609	0.000192934	4.82334e-05	0.000191513	0.000336123	0.000218219	0.000290749
K02610	0.000180468	0.000301856	5.35529e-05	0.000302843	2.72729e-05	0
K02611	0.000184026	0.000169048	0.0002911	3.85492e-05	3.00773e-05	0.000136483
K02612	0.000190545	7.5389e-05	0.000180098	6.54247e-05	2.0254e-05	0
K02613	0.000193718	0.000221742	0.00019362	0.000248012	5.89333e-05	0.000106702
K02614	7.6399e-05	0.000169689	3.38135e-05	4.45063e-05	9.14796e-05	0
K02615	7.4479e-06	0	5.40711e-06	2.07309e-05	0	0
K02616	5.74692e-05	0.000210969	2.79349e-05	3.59818e-05	7.02917e-05	0
K02617	2.50537e-05	0	0	1.19671e-05	1.85723e-05	0
K02618	0.000216434	0.000215225	4.97418e-05	0.000260965	0.000106609	0.00025644
K02619	0.000319765	0.000341163	1.50644e-05	6.80996e-05	7.58887e-05	6.88801e-05
K02621	0.000448201	0.000577565	0.000710626	0.000485452	0.000298668	0.000302164
K02622	0.000516458	0.000685688	0.000376734	0.00063786	0.000355108	0.000261514
K02623	0.00015216	0	0.000208571	4.18793e-05	2.62184e-05	0
K02624	0.000180137	0	0.000335946	3.76877e-05	0.000382461	0.000200201
K02625	7.10552e-06	0	0	0	0	0
K02626	1.38368e-05	0	0	3.99613e-05	0	0
K02634	0	0	0	0	0	0.00023576
K02635	0	0	0	0	0	0.000213877
K02636	0	0	0	0	0	8.77404e-05
K02637	0	0	0	0	0	9.79068e-05
K02638	0	0	0	0	0	0.00010747
K02639	1.65533e-05	0	0	0	0	0.000341366
K02641	0	0	0	0	0	5.36494e-05
K02647	9.40339e-05	0.00012912	1.13869e-05	0.000225883	0.000194374	0.00015522
K02650	5.81416e-05	0.000161245	2.14115e-05	0.000266962	0.000195298	9.89759e-05
K02651	0.000135335	0	0	9.15507e-05	6.92672e-05	0
K02652	0.000296781	0.000245249	0.000166057	0.00035991	0.000170293	0.00131767
K02653	0.000462719	0.000573572	5.41839e-06	0.000180052	0.00018489	0.000885497
K02654	0.000542574	0.000632799	7.62101e-05	0.000187105	0.000322544	0.00076685
K02655	6.09339e-05	0	1.12359e-05	0.000517524	0.000227969	0
K02656	8.53299e-05	0.000176481	1.55885e-05	0.000796336	0.000424261	7.13404e-05
K02657	9.67585e-05	0	0.00015955	2.30507e-05	0.000125336	8.1429e-05
K02658	6.66759e-05	9.27479e-05	0.000172635	0.000505879	0.000150419	0.000229293
K02659	0.000121302	0.000223925	0.000158488	0.00022011	0.000140335	9.13248e-05
K02660	8.94422e-05	4.88866e-05	5.16373e-05	0.000118334	0.000161299	8.72548e-05
K02662	0.000160046	0.000351708	6.97935e-05	0.000193651	3.50484e-05	0.000264384
K02663	0.00023252	0.000202951	0	8.16997e-05	3.62517e-05	0
K02664	0.000206795	6.3439e-05	0.000126139	0	0.00020367	7.7132e-05
K02665	0.000117896	0.000217516	0.000134679	2.51125e-05	7.78386e-05	0
K02666	0.000197421	0.000269943	8.19966e-05	0.000203174	0.000242473	0.000192992
K02667	0.000124787	0.000252049	6.18759e-05	5.45709e-05	2.86265e-05	0.000258704
K02668	6.85403e-05	6.25494e-05	2.47929e-05	1.57433e-05	8.27457e-06	0
K02669	0.000269211	0.000313799	0.000284692	0.000828361	0.000405151	0.00172617
K02670	0.000288488	0.000428225	5.66453e-05	0.000478402	0.000193377	0.000102944
K02671	8.26968e-05	0	0	0.000344869	0.000123137	0
K02672	7.28313e-05	0.000150288	3.31577e-05	8.52681e-06	0.000146748	0.000120915
K02673	3.87366e-05	0	1.89574e-05	0	9.58448e-05	0
K02674	0.000138946	0.000151516	5.79606e-05	3.7678e-05	9.56793e-05	0.000269064
K02676	8.5211e-05	0.000284631	3.78505e-05	5.01641e-05	0	0
K02679	2.83051e-05	0	0	1.36497e-05	0	0
K02680	5.00367e-05	0	0	0	1.85449e-05	0
K02681	5.29121e-05	0	5.22938e-05	0	0	0
K02682	1.50317e-05	0.000333745	0	4.37193e-05	0	0
K02686	7.39743e-05	0.000103178	1.37323e-05	0	5.59836e-05	0.0001283
K02687	0.000457863	0.000411486	0.000272393	0.000262916	0.000150743	0.000186363
K02688	1.06673e-05	0	3.85572e-06	8.80208e-05	0.000131191	0
K02689	0	0	0	0	0	0.000228322
K02690	0	0	1.63936e-05	0	0	0.000857041
K02691	0	0	0	4.1015e-05	0	0
K02692	0	0	0	0	0	9.81571e-05
K02693	0	0	0	0	0	0.000137344
K02694	0	0	0	0	0	0.000442107
K02698	0	0	0	0	0	0.000132511
K02703	8.16584e-06	0	0	9.88958e-05	0	0.00161992
K02704	0	3.36973e-05	0	0	0	0.000201502
K02705	0	0	0	0	0	4.43821e-05
K02706	0	0	0	0	0	0.000164337
K02707	0	0	0	0	0	0.000141928
K02714	0	0	0	0	0	0.000181854
K02716	0	0	0	0	0	6.35582e-05
K02717	0	0	0	0	0	0.000159805
K02719	1.57343e-05	0	0	0	0	0
K02723	0	0	0	0	2.76465e-05	0
K02742	0.000109327	0	1.00474e-05	0	2.03405e-05	0
K02745	0	0	1.0456e-05	4.11166e-05	0.00027539	0
K02746	1.0301e-05	0	7.52177e-06	3.88582e-05	0	0
K02749	9.91728e-05	9.58452e-05	0	5.36353e-06	0	0
K02750	0.000103553	9.45072e-05	4.16234e-06	0	8.33547e-06	0
K02752	6.39876e-06	3.50718e-05	0	0	0	0
K02753	6.39876e-06	3.50718e-05	0	0	0	0
K02755	0.000257504	0.000264238	0	0.000118064	9.31537e-05	3.50293e-05
K02756	0.000250549	0.000262558	0	0.000117297	9.25556e-05	3.48031e-05
K02757	0.000251341	0.000257865	0	0.000115156	9.08848e-05	3.41712e-05
K02759	0.000142078	0	0	0	0	0
K02760	0.00025431	0	0	0	0	0.000125824
K02761	0.000313247	0.000381849	5.0487e-06	4.50857e-05	0.000111397	0
K02763	6.22141e-05	0	7.49359e-06	4.74935e-06	0	3.38256e-05
K02764	5.95424e-05	0	7.16857e-06	4.53974e-06	0	3.23408e-05
K02765	5.95424e-05	0	7.16857e-06	4.53974e-06	0	3.23408e-05
K02768	0.000263964	0.000128504	0.000411765	0.000965539	0.00121583	0.000422268
K02769	0.000274462	0.000130729	0.000190025	3.84285e-05	0.000181675	0.000156259
K02770	0.000271208	0.00012374	0.000179834	3.63261e-05	0.000171859	0.000147763
K02773	5.84162e-05	0	0	0	0	9.94752e-05
K02774	0.000169997	0.000105443	1.40371e-05	0	2.86293e-05	0.000131287
K02775	0.000162721	0	2.45781e-05	1.25338e-05	9.85759e-06	8.91068e-05
K02777	0.000117117	0.000117438	0.000124478	1.00609e-05	0	0
K02778	0.000132388	0.000131859	2.61371e-05	5.53838e-06	1.74535e-05	3.94082e-05
K02779	0.000120961	0.000126166	2.50052e-05	5.29361e-06	1.66919e-05	3.76775e-05
K02781	6.67748e-05	0	0	0	0	0
K02782	0.000143846	0.000247314	0	0	0	0
K02783	0.000440376	0.000289064	7.65907e-06	0	0	0
K02786	7.18198e-05	0	0	0	0	0
K02787	5.63636e-05	0	0	0.00022776	0	0
K02788	5.72261e-05	0	0	0.000231357	0	0
K02790	7.77226e-05	3.27492e-05	4.32762e-06	0	4.33455e-05	3.9146e-05
K02791	7.77226e-05	3.27492e-05	4.32762e-06	0	4.33455e-05	3.9146e-05
K02793	0.000400384	0.000184141	0.000252174	0.000179153	1.641e-05	0.000223629
K02794	0.000329376	0.000113475	7.5158e-06	1.94131e-05	0	6.87264e-05
K02795	0.000281716	0.000155084	3.42214e-05	2.64291e-05	0	6.24424e-05
K02796	0.000106494	0	7.06033e-06	0	1.42146e-05	0
K02798	0.000150853	0.000130845	0.000288491	0.000421065	0.000788038	0.000157343
K02799	0.000113234	9.29958e-05	0.000204778	6.24042e-05	0.000811873	0.000111054
K02800	0.000113025	9.2823e-05	0.000204397	5.70951e-05	0.000810349	0.000110844
K02802	3.16166e-05	2.88345e-05	0	0	0.000205809	3.43927e-05
K02803	0.0001036	6.67747e-05	0.000410338	0.000134669	0.000353599	0.000119769
K02804	0.00010929	6.29954e-05	0.00038704	0.000132152	0.000333368	0.000112873
K02805	0.000125972	0.000216231	0.000183067	2.19678e-05	1.14894e-05	0
K02806	0.000210397	7.77417e-05	0.000825612	0.000216289	0.000188129	0.000285852
K02808	4.56897e-05	0.000111087	1.10041e-05	0	0.000337591	0
K02809	0.000177573	0.000234836	3.54684e-05	2.25555e-05	0.000417501	0
K02810	0.000177559	0.000234817	3.54654e-05	2.25536e-05	0.000417466	0
K02812	1.57764e-05	0	0	0	0	0
K02815	9.82824e-06	0	0	0	0	0
K02817	5.10185e-06	2.79108e-05	0	0	0	0
K02818	0.00011712	0.000135099	4.4636e-06	0	0.000420355	4.03947e-05
K02819	0.000117498	0.000169424	4.4782e-06	0	0.000421741	4.05288e-05
K02821	0.00019555	0	4.11031e-05	1.34569e-05	6.24349e-05	0
K02822	0.000117541	0	0	0	5.05299e-05	0
K02823	4.12176e-05	5.68013e-05	7.5243e-06	2.91539e-05	0	0
K02824	0.000192022	0.000117064	3.09582e-05	3.95162e-05	0.000165628	4.68045e-05
K02825	0.000264867	0.00021995	5.83702e-05	7.62285e-05	0.000295244	0.000268911
K02826	1.94828e-05	5.36536e-05	4.26304e-05	0	0	0
K02827	2.49459e-05	2.72899e-05	3.60421e-06	0	0	0
K02828	3.88607e-05	0	0	0	0	0
K02834	0.000740681	0.000268551	0.000190361	0.000424172	0.000193352	0.0002209
K02835	0.000565513	0.000621437	0.000405209	0.000458873	0.000330328	0.000587404
K02836	0.000600428	0.000595882	0.00116451	0.000606576	0.000645995	0.00066225
K02837	0.000820991	0.000586557	0.000254057	0.000377657	0.000629665	0.000467377
K02838	0.000550602	0.000354213	0.000234943	0.000379825	0.000418051	0.000259476
K02839	1.25827e-05	0	0	0	0	0
K02840	0	4.45475e-05	5.89374e-06	0	0	0
K02841	9.48322e-05	0.000426651	9.41056e-05	8.05236e-06	0.000126125	0.000285629
K02843	0.000167104	0.000229628	0.000230923	0.000342855	0.000158762	0.000331781
K02844	0.000110009	0.000129481	7.99315e-05	0.000138843	0.000114661	5.18876e-05
K02846	3.16056e-05	0	5.7416e-06	0	0	0
K02847	1.4735e-05	4.04385e-05	0	0	0	0
K02848	4.03986e-05	0	3.68585e-05	0	7.42499e-05	0
K02849	0.000112963	8.86659e-05	5.86523e-06	7.51281e-06	1.17825e-05	0
K02851	7.26624e-05	0.000177439	0	0.00012028	0	5.3365e-05
K02852	8.60203e-05	0	0	0	0	0.00035973
K02853	6.10684e-05	0	0	6.27204e-06	0	0
K02854	9.47908e-06	5.21888e-05	0	8.89729e-06	0	0.000126114
K02855	9.85396e-06	0	0	0	0.000188196	0
K02856	0.000108938	0.000276376	4.26659e-05	7.81622e-06	3.67485e-05	0
K02858	9.2425e-05	6.38011e-05	4.22878e-05	1.09746e-05	1.70716e-05	0.000155176
K02859	1.68466e-05	0	0	0	0	0
K02860	0.000347054	0.000221726	0.000323648	0.000358771	0.000773995	0.000271173
K02862	0	0	0	8.80427e-06	0	0
K02863	0.000246518	6.18492e-05	0.000631182	0.000775463	0.00076075	0.00112698
K02864	0.00033964	7.22996e-05	0.000182256	0.000338002	0.000310448	0.00132514
K02867	0.000212192	0.000757304	0.000458276	0.000382331	0.000317461	0.000828047
K02871	0.000520006	0.000494683	0.000470852	0.000388508	0.000399691	0.000405281
K02874	0.000282045	9.23026e-05	0.00131303	0.00102278	0.00107266	0.00114067
K02876	0.000310178	0.000409771	0.000337405	0.00185869	0.000353095	0.000302059
K02878	0.000201648	0.000258479	0.000789874	0.00030162	0.000371763	0.00159158
K02879	0.000359441	0.000607752	0.000588345	0.000258481	0.000374706	0.00171137
K02881	0.000148139	9.15561e-05	0.000572042	0.000627659	0.000123687	0.00135716
K02884	0.000583129	0.000741612	0.000443693	0.000342508	0.000375853	0.000916689
K02886	0.000408989	0.000164883	0.00201632	0.000957759	0.000806355	0.00186224
K02887	0.000521893	0.000187392	0.000685207	0.00037945	0.000202677	0.000579405
K02888	0.000317323	0.000294688	0.000561885	0.000347165	0.000266027	0.000365405
K02890	0.000199555	0.000185047	0.000418231	0.000764984	0.00017505	0.00194402
K02892	0.000391057	0	0.000373442	0.000479591	0.000253786	0.000646341
K02895	0.000285494	0.000298365	0.00140257	0.000281471	0.000781443	0.000740446
K02897	0.000469003	0.000288404	0.000248712	0.000711489	0.000212832	0.000440452
K02899	0.000527124	0.00054544	0.000392248	0.000175002	5.93142e-05	0.000952765
K02902	0.000696505	0.000118211	0.000220603	0.000318389	0.00022569	0.000444806
K02904	0.000217922	0.000244356	0.000228098	0.000704274	0.000233593	0.000921573
K02906	0.000375553	0.000439819	0.000474706	0.000464385	0.000369741	0.00137461
K02907	0.000173468	0.000243098	0.000372778	0.0010942	0.00059744	0
K02909	0.000806331	0.00081006	0.000400965	0.0001659	0.000819908	0
K02911	0.000554872	0.00038963	0.00138664	4.7084e-05	0.000462417	0.000820021
K02913	0.000601809	0.000541683	0.000216997	0.000221924	0.000148649	0.0012009
K02914	0.000328279	0.000426926	0.000475407	0.000208474	0.000156596	0.00018101
K02916	0.000646223	0.000500096	0.00085053	0.000180586	0.000205094	0.000314865
K02919	0.00028995	0.000297585	0.000378023	0.000191748	0.000246168	0.000189978
K02926	0.000155786	0.00026488	0.000412677	0.000696129	0.00042561	0.000725748
K02931	0.000394806	0.00029139	0.00059927	0.000668798	0.000703937	0.00115752
K02933	0.000387163	0.000591371	0.000833781	0.00133282	0.000238194	0.00171773
K02935	0.000148082	0.000274561	0.000243327	0.000144784	9.89095e-05	0.000791352
K02939	0.000506405	0.000240735	0.000394241	0.000307575	0.000194357	0.000590947
K02945	0.00060745	0.000268944	0.00066198	0.000598999	0.000658728	0.00144733
K02946	0.000527415	0.00040568	0.000107968	0.000521061	0.000329974	0.000251975
K02948	0.000418054	0.000446937	0.000261364	0.000156857	0.000337861	0.000992536
K02950	0.000502179	0.000720578	0.000143665	0.000743279	0.000121618	0.0011117
K02952	0.000394783	0.000457479	0.000231097	0.000530721	0.000173043	0.0024864
K02954	0.00028347	0.00011326	0.000920468	0.000243071	0.00027753	0.00127488
K02956	0.00038197	0.000213297	0.00038338	0.000246646	0.000579376	0.000398637
K02959	0.000453401	0.000404519	0.000148026	0.000250769	0.0011789	0.000502424
K02961	0.00029112	0.000325279	0.000577544	0.000907877	0.000147352	0.000811394
K02963	0.000705958	0.000225624	0.000270529	0.000423542	0.00021497	0.000141057
K02965	0.000188731	0.000105354	0.00054698	0.000542974	0.000286043	0.00183638
K02967	0.000451028	0.000508504	0.000606222	0.00052187	0.000286515	0.00143704
K02968	0.000487866	0.000327118	0.00013069	0.000194353	0.000800371	0.000136045
K02970	0.000506526	0.00037054	0.000131784	8.90928e-05	0.000101253	0
K02972	0	0.000142561	1.90505e-05	0	0	0
K02982	0.000253271	0.000121527	0.000700559	0.000740358	0.000259866	0.00132784
K02986	0.000478985	0.000339484	0.000828389	0.000445213	0.00052761	0.000413792
K02988	0.000285602	0.000287367	0.00118187	0.000348176	0.000559034	0.000702086
K02990	0.000506269	0.000657485	0.000224806	0.000529325	0.000406382	0.000580905
K02992	0.000615361	7.93502e-05	0.000358204	0.000400638	4.26955e-05	0.00116813
K02994	0.00028838	0.00044529	0.000852192	0.000640579	0.000264453	0.00186753
K02996	0.000511129	0.000258094	0.0004915	0.000421595	0.000185596	0.000423757
K03002	0	0	2.23836e-06	0	0	4.02105e-05
K03040	0.000557928	0.000377571	0.000761996	0.00039276	0.000351566	0.00142167
K03043	0.000396126	0.000268096	0.000931238	0.000772709	0.000380101	0.00114598
K03046	0.000436349	0.00053017	0.000818353	0.00131283	0.0004636	0.00128866
K03048	2.6551e-05	0	9.75263e-06	0	0	8.98682e-05
K03060	0.000292522	0.000217927	0.000406306	0.000252468	0.000266598	0.00108755
K03070	0.000756576	0.00055491	0.000884277	0.000773131	0.000406323	0.00134216
K03071	0.000300159	0.000317006	0.000715508	0.000151765	0.000170564	0.000194434
K03072	0.00035024	0.000556718	0.000657896	0.000378751	0.000417286	0.000517063
K03073	0.000346571	0.000107541	0.000343667	0.000478633	0.000175324	0.000938423
K03074	0.000386772	0.000290087	0.000454329	0.000805393	0.000463227	0.000641206
K03075	0.000271328	0.00110944	0.000335509	0.00010716	5.46799e-05	0.000751493
K03076	0.00056588	0.000946301	0.000590533	0.00120001	0.000501876	0.00131581
K03077	1.12454e-05	0	0	0	0	0
K03078	2.34323e-05	0	0	0	5.19665e-05	0
K03079	4.82337e-05	5.31249e-05	0	0.000117824	8.49733e-05	0
K03080	0	0.000123983	8.21616e-06	0	0	0
K03081	0	0.000128742	0	0	0.000120592	0
K03082	1.92438e-05	0	0	9.03876e-06	4.23738e-05	0
K03086	0.000772781	0.000723035	0.000618873	0.000816534	0.000519804	0.00173013
K03088	0.00325399	0.00260738	0.00585992	0.00358496	0.00431583	0.00301335
K03089	0.000470032	0.000569261	0.000205554	0.00057328	0.00022063	0.000187538
K03090	3.03128e-05	5.56817e-05	1.47503e-05	1.90364e-05	0	6.74079e-05
K03091	0.000113214	0.000125001	0	2.14801e-05	0	0
K03093	0	0	0	0	0	0.00019895
K03095	4.43769e-05	0	0	0	0	0
K03098	0.000146155	0.00036781	9.76115e-06	8.92477e-05	5.92515e-05	0.000899493
K03100	0.00101895	0.00150597	0.000744339	0.000565337	0.000464002	0.000982902
K03101	0.000802786	0.00113051	0.00035009	0.000706375	0.000404962	0.000276753
K03106	0.000528879	0.0006443	0.000515732	0.000602668	0.000218159	0.000942873
K03110	0.000606726	0.000458043	0.000484659	0.00040844	0.000132679	0.000500183
K03111	0.00089466	0.00141712	0.000428542	0.00194544	0.00213877	0.00135167
K03112	3.42877e-05	0.000112834	9.94519e-06	5.7072e-05	8.97561e-05	0
K03113	0.000192127	0.000194595	7.76515e-05	1.71809e-05	0.00015805	0.000120582
K03116	0.00061563	0.000344502	7.65093e-05	2.05635e-05	0.000281545	0.000143752
K03117	0.000402902	0.000239387	8.47601e-05	9.72825e-05	8.58837e-05	9.79148e-05
K03118	0.000635785	0.000547306	0.000362424	0.000411347	0.000510944	0.000662214
K03119	0.000273709	0.000207843	0.000227031	0.000779405	0.000816932	0.000313867
K03147	0.000348549	0.000250296	0.00075235	0.000960728	0.000306281	0.000373682
K03148	1.06952e-05	0	0	0	0	0
K03149	0.000445175	0.000334538	0.00115946	0.000514702	0.000178528	0.000405006
K03150	0.000124585	0.000201111	0	1.35899e-05	1.06748e-05	0
K03151	0.000158005	0	3.12678e-05	6.6536e-06	8.365e-05	4.72809e-05
K03152	0.000100466	0	0	0.000119994	3.72418e-05	0
K03153	0.00025686	0.000132299	5.83425e-05	0.000216687	0.000140635	0.000318269
K03154	0.000197065	0.000245558	0.000261982	6.63829e-05	0	0
K03166	7.90711e-06	0	8.61873e-05	2.20665e-05	0	0.0002089
K03167	5.28888e-06	5.78836e-05	0	9.69559e-06	0	0.000103568
K03168	0.000938751	0.00136009	0.000721417	0.00109493	0.000554141	0.000879882
K03169	0.00043264	0.000427737	0.000990055	0.000546332	0.000717448	0.000269556
K03177	0.000724689	0.00111062	0.00026732	0.000163308	9.41186e-05	0.000914062
K03179	0.000585843	0.000832342	0.000399491	0.000425645	0.000138627	0.00113128
K03181	0.000106304	0.000147138	4.88105e-05	1.2751e-05	5.92574e-05	0
K03182	0.000158018	0.000299665	0.000145204	6.71456e-05	0.000211573	0.000716611
K03183	0.000607738	0.000598703	0.000428399	0.000462025	0.000687909	0.00101707
K03184	5.27855e-05	4.14e-05	1.09512e-05	0	0	0
K03185	0.000274622	0.000529646	0.000156257	0.000523295	0.000183849	0.00019566
K03186	0.000200311	0.000207707	0.000165294	5.97978e-05	0.000185609	0.000506721
K03187	0.000322811	0.000148972	6.91929e-05	3.87574e-05	0.000100025	0.000364506
K03188	0.00023535	0.000185578	3.2794e-05	0.000106246	0.000132326	0.00015029
K03189	0.000352237	0.000389146	8.59854e-06	0.000111654	0.000121525	0.000157839
K03190	0.000301007	0.000160433	2.83265e-05	0.000155142	0.000128322	0
K03192	0.000124679	0	0.00017374	2.38134e-05	3.69622e-05	8.40856e-05
K03194	0.000158017	0.000124614	0.000404652	5.35258e-05	8.33153e-05	0
K03195	0.000343821	0.00044164	0.000605277	6.7822e-05	0.000415549	0.000240937
K03196	0.000583839	0.000472095	0.000737218	8.81961e-05	0.000427022	0.000113766
K03198	0.000352507	0.000207037	0.000633795	0.000146961	0.000280876	0.000128749
K03199	0.000433341	0.000473467	0.000660729	0.00023678	0.000713675	8.03987e-05
K03200	0.00033583	0.000185362	0.000524091	0.000297126	0.000413028	0
K03201	0.00011583	0.000144051	0.000251169	9.16801e-05	0.000137089	0.00085908
K03202	1.71591e-05	0	0	0	0	0
K03203	0.00016399	0.00018096	0.000167858	3.10437e-05	8.06026e-05	0.000146424
K03204	0.00055143	0.000104694	0.000658456	0.000160656	0.000571995	6.32535e-05
K03205	0.000623172	0.000340965	0.00060049	0.000499532	0.000533225	0.000203298
K03207	1.43793e-05	0	0	0.00018053	2.14551e-05	0
K03208	0	3.99387e-05	9.50673e-05	0.000148403	0.000127182	0
K03210	0.000349576	0.000194741	0.000466261	8.59737e-05	0.000184535	0.000241355
K03212	6.28266e-05	4.31355e-05	1.14122e-05	3.65162e-05	0	0
K03214	8.40546e-06	4.62054e-05	0	1.56826e-05	0	0
K03215	0.000297152	0.000227429	0.00023053	0.000127844	0.000201034	0
K03216	0.000655203	0.000552789	0.00160413	0.000632262	8.49704e-05	0.000193713
K03217	0.000640389	0.000868677	0.00046439	0.000630489	0.000540815	0.000769603
K03218	0.000621162	0.00077285	0.000336327	0.000245258	0.00103089	0.00053449
K03219	5.23831e-05	2.8663e-05	4.5433e-05	0.000292805	0.000378837	6.83697e-05
K03220	7.72284e-06	0	0	2.87063e-05	4.50565e-05	0
K03222	3.07553e-05	0	1.49701e-05	3.86615e-05	0.000120652	0
K03223	2.27794e-05	0	0	0	0	0
K03224	4.13858e-05	0	2.50103e-05	6.37984e-06	0.000120391	0
K03225	0	0	0	8.0274e-06	5.02967e-05	0
K03226	2.27039e-05	6.26715e-05	8.30686e-06	2.15417e-05	0.00018439	0
K03227	1.9763e-05	0	0	0	6.00938e-05	0
K03228	1.01244e-05	0.000111589	2.21705e-05	9.53833e-06	4.46631e-05	0
K03229	5.76624e-05	0	0	0.000107481	7.22141e-05	0
K03230	8.5195e-05	2.58793e-05	6.83486e-06	0.000493034	9.56813e-05	6.16358e-05
K03235	3.24975e-06	0	0	0	0	0
K03239	0	0	0	7.86851e-06	0	0
K03265	7.24029e-06	0	0	0	0	0
K03268	0	0	0	1.25781e-05	0	0
K03269	0.000235878	0.000236551	7.05208e-05	8.10869e-05	4.73943e-05	0.000143459
K03270	0.000318087	0.000220124	9.73612e-06	7.62923e-05	0.000177291	0.000269133
K03271	0.000421555	0.000548444	0.000254581	0.000106522	0.000110245	0.000919512
K03272	0.000240553	0	2.82659e-05	0.000419996	0.00101047	8.53381e-05
K03273	0.000192528	0.000284059	9.42069e-05	0.000380798	0.000114298	0.000433551
K03274	0.00016831	9.74549e-05	0.000399868	4.14261e-05	3.89104e-05	5.87615e-05
K03275	0	0	0	0	3.75089e-05	0
K03281	0.000342642	0.000291211	0.000538725	0.000364062	9.42046e-05	0.000618698
K03282	0.000620097	0.000516653	0.000251694	9.04288e-05	0.00023221	0.000424158
K03284	0.000826161	0.000908677	0.00115197	0.00139771	0.000496313	0
K03286	0.000322923	0.000373762	0.00026585	0.000341066	0.000559225	0.000112557
K03287	0.000109794	0.000212413	2.33973e-05	5.95888e-06	0	4.23791e-05
K03288	3.48195e-05	0	0	0.00028996	0.000101312	0
K03289	1.42655e-05	3.91366e-05	0	0	0.000166124	0
K03290	5.61871e-05	0.000136842	1.80855e-05	0	4.53022e-05	0
K03291	8.28095e-05	0.000123989	1.09325e-05	0	0.000362106	0
K03292	0.000119205	0.00018155	7.67982e-05	4.8927e-05	0.000298328	8.6975e-05
K03293	0.00125168	0.00145759	0.000488718	0.0004668	0.00250569	8.51216e-05
K03294	0.000910541	0.00138478	0.000804498	0.000834856	0.000415328	0.000305538
K03295	0.000642115	0.00144307	0.000309589	0.000575801	0.0024115	0.000480339
K03296	0.00144017	0.0018531	0.00141297	0.00222578	0.00147815	0.000950634
K03297	0.000612528	0.000682472	3.89058e-05	8.60934e-05	0.000105589	0.000120842
K03298	0	0	0	0	1.36087e-05	0
K03299	0.000182511	7.41387e-05	0.000235231	0.000655973	0.000324302	8.88311e-05
K03300	0.000143908	3.75849e-05	0.000491937	0.000582978	0.000398631	9.00921e-05
K03301	3.52228e-05	0.000289364	0	0	0	0
K03302	0.000132114	0	2.52152e-05	0	0	0
K03303	0.000371015	0.000253971	0.000335574	0.000122562	0.000168014	7.58527e-05
K03304	7.00771e-05	4.81771e-05	0	8.18822e-06	5.12849e-05	0
K03305	0.0008387	0.00156594	0.000391419	0.000354893	0.00036963	0.000203603
K03306	0.00072697	0.000758023	0.00139282	0.00111179	0.000444654	0.000670276
K03307	0.000458221	0.000602513	0.000115013	0.000281297	0.000203846	0.0010407
K03308	0.000336622	0.000532279	0.000159476	5.97323e-06	0.000582938	0.000552246
K03309	6.62249e-05	0	0	8.18846e-05	2.14385e-05	0
K03310	0.000739552	0.000924603	0.000173922	0.000490888	0.0002073	0.000723752
K03311	0.000290348	0.000303352	9.52546e-05	0.000134288	0.000120666	0
K03312	0.000254208	0.000318874	0.00026882	0.000215416	6.34628e-05	4.78319e-05
K03313	0.000451997	0.000720181	0.000280423	0.000317626	0.000222971	0.000624219
K03314	4.2297e-05	0	0	5.00576e-05	0	0.000118725
K03315	9.18844e-05	0.000143926	4.75631e-06	4.24133e-05	0	4.30863e-05
K03316	0.000737377	0.000688579	0.00104625	0.000551454	0.000720454	7.47656e-05
K03317	0.000229038	0.000274914	0.000218114	0.000238675	0.000125035	0.000141341
K03319	0.000177432	0.000252196	1.42874e-05	2.42683e-05	1.90956e-05	4.3143e-05
K03320	0.00046159	0.000529031	0.000544565	0.000375944	0.000300609	0.000498239
K03321	0.000228113	0.000249806	2.06284e-05	0.000230532	0.000156968	0.000223763
K03322	0.000662792	0.000344448	0.000743857	0.00045837	0.000365413	4.58869e-05
K03324	0.00019496	0.000226507	0.000312132	5.9774e-05	0.000137031	0.000309362
K03325	0.000531427	0.000584063	0.000219939	0.00018281	9.55445e-05	0
K03326	3.35603e-05	3.68058e-05	1.4597e-05	4.96137e-05	1.95131e-05	0
K03327	0.000553927	0.000882638	0.000200665	0.000576391	0.000533179	0.000591655
K03328	0.000318109	0.000218018	0.000177725	0.000128529	0.0003467	0.000130559
[truncated: 3,076 more rows]

## Sheet: COG_proportion.xls
	NY_INDOOR	NY_OUTDOOR	SD_IHOSP	SD_OHOSP	SD_IHOUS	SD_SCRPP
[J] Translation, ribosomal structure and biogenesis	0.0645054	0.0687285	0.0667142	0.0623855	0.0500017	0.10009
[A] RNA processing and modification	0.000301582	8.24689e-05	0.00010254	0.000544181	0.000595087	0.000256465
[K] Transcription	0.0642639	0.0519535	0.0703006	0.0677115	0.0752033	0.0509299
[L] Replication, recombination and repair	0.0681236	0.0878975	0.0552287	0.0483608	0.0689192	0.05924
[B] Chromatin structure and dynamics	0.000339938	0.000107707	0.000254191	0.000177969	0.000601708	0.000132903
[D] Cell cycle control, cell division, chromosome partitioning	0.00816083	0.00964896	0.00751794	0.00605754	0.00619742	0.00900046
[V] Defense mechanisms	0.0178774	0.0234026	0.0167532	0.0159342	0.0156266	0.0133552
[T] Signal transduction mechanisms	0.0579892	0.0609252	0.0726379	0.0761418	0.0679312	0.0489771
[M] Cell wall/membrane/envelope biogenesis	0.0534585	0.0668504	0.0489976	0.0481659	0.047488	0.0511877
[N] Cell motility	0.0125949	0.0120034	0.0196267	0.0271082	0.0198414	0.0149255
[U] Intracellular trafficking, secretion, and vesicular transport	0.0221722	0.0252088	0.0244107	0.0290806	0.0231499	0.0264207
[O] Posttranslational modification, protein turnover, chaperones	0.0335758	0.0365212	0.0324744	0.0334811	0.0303398	0.0393253
[C] Energy production and conversion	0.0605663	0.058885	0.0743699	0.0724067	0.0617032	0.0708488
[G] Carbohydrate transport and metabolism	0.0693405	0.0663885	0.0627193	0.0639315	0.0724943	0.053682
[E] Amino acid transport and metabolism	0.112741	0.0903262	0.109759	0.110067	0.11727	0.101286
[F] Nucleotide transport and metabolism	0.0373047	0.0348789	0.0270678	0.0317481	0.032011	0.0470484
[H] Coenzyme transport and metabolism	0.0605837	0.0577833	0.0528826	0.0595051	0.0571295	0.0725312
[I] Lipid transport and metabolism	0.0413208	0.0417237	0.0493618	0.0431781	0.042208	0.0440053
[P] Inorganic ion transport and metabolism	0.0567449	0.0492361	0.0638358	0.059892	0.0655489	0.0554378
[Q] Secondary metabolites biosynthesis, transport and catabolism	0.0252509	0.0249057	0.0280118	0.0289114	0.0283822	0.0246707
[R] General function prediction only	0.0968879	0.0987024	0.0884086	0.0868497	0.090014	0.0832929
[S] Function unknown	0.0358965	0.0338399	0.0285647	0.0283609	0.0273432	0.0333557
