# Supplementary material for: A Metagenomic Framework for the Study of Airborne Microbial Communities
Source: PLoS One. 2013 Dec 11;8(12):e81862. doi: 10.1371/journal.pone.0081862 (PMC3859506; doi:10.1371/journal.pone.0081862)
Supplement: Table S8 — Mapping of metagenomic reads to sequenced genomes. A read was considered as mapping to a sequenced genome if its BLASTN match had > = 80% identity over > = 90% of the read length. (XLSX) [file pone.0081862.s012.xlsx]

## Sheet: FragRecruit_80id_90_Genus.xls
Mapping of metagenomic reads to sequenced genomes. A read was considered as mapping to a sequenced genome if its BLASTN match had >=80% identity over >=90% of the read length. This sheet shows the information at the genus level, and the next sheet shows the information at the species level.
	NY_INDOOR	NY_OUTDOOR	SD_IHOSP	SD_OHOSP	SD_IHOUS	SD_SCRPP
Acaryochloris	0	0	0	0	0	1
Acetobacter	0	1	131	7	0	0
Acetohalobium	0	0	0	0	0	1
Acholeplasma	0	0	0	0	0	0
Achromobacter	66	2	74280	8289	1527	38
Acidaminococcus	1	0	0	0	0	0
Acidimicrobium	0	0	0	2	0	2
Acidiphilium	13	1	35	56	1	0
Acidithiobacillus	3	2	0	24	0	0
Acidobacterium	7	2	1	12	0	0
Acidothermus	0	0	0	3	0	0
Acidovorax	511	75	620	696	1730	21
Acinetobacter	823	596	99	29	25	14
Actinobacillus	5	0	1	0	41	0
Actinospica	5	2	2	25	8	0
Actinosynnema	12	1	6	31	7	0
Aequorivita	3	0	0	1	0	2
Aerococcus	6	2	3	0	0	0
Aeromonas	150	8	81	29	37	1
Afipia	215	2	127	22	17	0
Aggregatibacter	56	0	3	0	2	0
Agrobacterium	1120	13	130	459	722	2
Akkermansia	19	2	12	1	1	5
Albidiferax	3	0	20	9	2	0
Alcanivorax	0	1	4	0	0	1
Alicycliphilus	66	34	167	130	209	15
Alicyclobacillus	0	0	0	2	0	0
Aliivibrio	1	1	0	0	1	4
Alistipes	8	1	3	0	0	0
Alkalilimnicola	0	0	1	1	0	0
Alkaliphilus	0	2	2	0	0	1
Allochromatium	2	0	3	1	1	0
Alphabaculovirus	27	1	1	3	0	0
Alphapapillomavirus	0	1	0	0	0	0
Alteromonas	6	2	167	25	1	42
Amycolatopsis	6	1	23	33	23	0
Amycolicicoccus	3	1	1	2	0	0
Anabaena	9	1	2	4	0	0
Anaerococcus	136	0	3	0	0	0
Anaerolinea	0	0	0	3	0	0
Anaeromyxobacter	6	2	11	48	0	0
Anoxybacillus	152	1	13	7	0	0
Aquiflexum	4	1	4	1	0	0
Arcanobacterium	3	0	0	0	0	0
Arcobacter	9	7	1	0	0	1
Aromatoleum	10	0	10	15	1	0
Arthrobacter	146	78	125	166	48	5
Ascovirus	16	0	0	11	0	0
Asticcacaulis	2	0	25	8	1	0
Atopobium	14	0	5	0	0	0
Azoarcus	14	1	37	27	16	0
Azorhizobium	25	1	57	32	9	0
Azospirillum	20	3	69	65	11	0
Azotobacter	0	0	0	0	0	0
Bacillus	280	152	112	117	460	10
Bacteroides	420	14	19	3	1	0
Barnesiella	9	0	1	1	0	0
Bartonella	2	0	0	0	1	0
Bdellovibrio	2	1	0	2	0	0
Beijerinckia	1	0	0	4	0	0
Belliella	12	7	4	1	0	0
Betabaculovirus	5	1	0	0	0	0
Beutenbergia	9	4	12	28	76	1
Bifidobacterium	131	3	44	97	12	2
Blattabacterium	61	0	0	0	0	0
Bordetella	37	2	1387	239	160	2
Brachybacterium	66	10	28	59	17	1
Brachyspira	1	0	0	0	0	0
Bracovirus	0	0	0	0	1	0
Bradyrhizobium	4111	54	2717	708	8025	69
Brenneria	42	1	3	10	9	0
Brevibacillus	1	0	2	5	0	0
Brevibacterium	25	4	43	12	7	0
Brevundimonas	27	8	152	485	149	7
Brucella	98	1	5	18	7	0
Buchnera	6	0	0	0	0	0
Burkholderia	222	31	1595	807	2481	37
Butyrivibrio	1	0	0	0	0	0
Calditerrivibrio	0	0	0	0	0	0
Campylobacter	16	2	0	0	0	0
Candidatus.Accumulibacter	6	3	6	4	8	0
Candidatus.Cloacamonas	0	3	0	0	0	0
Candidatus.Hamiltonella	2	0	0	0	0	0
Candidatus.Koribacter	0	0	0	5	0	0
Candidatus.Liberibacter	0	0	0	1	0	0
Candidatus.Pelagibacter	10	2	0	0	0	1
Candidatus.Phytoplasma	0	0	0	0	0	1
Candidatus.Protochlamydia	2	2	0	0	0	0
Candidatus.Puniceispirillum	0	0	0	0	0	4
Candidatus.Solibacter	7	0	1	9	1	0
Capnocytophaga	23	0	0	0	59	3
Carnobacterium	19	3	2	0	0	0
Catenulispora	2	1	5	26	1	0
Caulobacter	54	5	284	192	43	4
Cellulomonas	45	7	49	204	61	10
Cellulophaga	2	3	0	2	0	8
Cellvibrio	0	0	2	14	1	0
Chelativorans	43	3	18	33	7	0
Chitinophaga	7	0	4	3	1	0
Chlorobaculum	1	0	0	0	0	0
Chlorobium	2	0	0	0	0	0
Chloroflexus	0	0	0	0	0	0
Chromobacterium	7	0	21	13	4	0
Chromohalobacter	4	0	1	11	0	9
Chthoniobacter	1	0	2	9	0	0
Citrobacter	49	6	66	14	70	1
Clavibacter	29	4	76	940	267	12
Cloacibacillus	1	0	0	0	0	0
Clostridium	104	12	14	30	5	12
Collimonas	34	3	66	97	4	1
Colwellia	0	0	0	0	0	1
Comamonas	88	29	170	64	107	2
Conexibacter	11	0	28	65	2	3
Coprothermobacter	0	0	0	0	0	0
Coraliomargarita	0	0	0	0	0	32
Coriobacterium	1	0	48	1	0	0
Corynebacterium	1152	73	300	31	83	22
Coxiella	1	0	0	2	0	0
Croceibacter	0	0	0	2	0	0
Crocosphaera	0	0	0	1	0	0
Cronobacter	28	1	19	16	3	0
Cryptobacterium	0	0	0	1	0	0
Cupriavidus	166	290	3746	680	1220	83
Cyanothece	0	0	1	17	0	0
Cyclobacterium	0	0	0	0	0	0
Cytophaga	5	3	0	2	0	1
Dechloromonas	6	1	9	0	30	1
Dehalococcoides	16	1	15	41	1	2
Deinococcus	282	72	64	94	118	1
Delftia	104	10	183	268	577	5
Desulfarculus	0	0	0	1	0	1
Desulfatibacillum	0	0	0	0	0	1
Desulfitobacterium	1	0	0	0	0	0
Desulfobacca	3	0	1	3	1	0
Desulfomicrobium	0	0	2	0	0	0
Desulfomonile	0	0	0	1	0	0
Desulfonatronospira	0	0	0	0	0	0
Desulfosporosinus	1	0	0	0	0	0
Desulfotomaculum	2	0	0	0	0	0
Desulfovibrio	3	2	5	3	2	1
Desulfurispirillum	1	0	0	0	1	0
Desulfurivibrio	0	0	0	0	0	1
Desulfuromonas	0	0	0	1	0	0
Dethiobacter	0	0	0	1	0	0
Dichelobacter	1	0	0	0	0	0
Dickeya	34	0	1	5	1	0
Dinoroseobacter	6	2	9	26	4	1
Dyadobacter	20	6	0	18	1	0
Ectothiorhodospira	3	0	0	1	1	2
Edwardsiella	6	0	7	11	67	0
Eggerthella	1	0	0	1	0	1
Emticicia	1	1	0	0	0	0
Enterobacter	289	13	509	337	966	12
Enterococcus	61	12	31	5	43	2
Epsilon15.like.viruses	2	0	0	0	0	0
Erwinia	59	2	58	60	71	5
Erysipelothrix	2	0	0	0	0	7
Erythrobacter	21	18	453	216	17	4
Escherichia	515	1783	3382	5632	15602	1138
Ethanoligenens	1	0	0	0	0	0
Eubacterium	219	6	16	0	0	0
Exiguobacterium	29	12	15	51	16	1
Ferrimonas	1	0	0	0	0	0
Fervidobacterium	0	0	1	1	0	0
Finegoldia	348	9	17	0	0	0
Fischerella	2	0	0	5	0	0
Flavobacterium	106	46	1	4	2	1
Flexibacter	1	0	0	0	0	0
Fluviicola	0	2	2	2	0	12
Francisella	0	0	0	1	0	0
Frankia	21	0	36	63	47	2
Fusobacterium	32	0	0	0	0	0
Gallibacterium	0	0	0	0	0	1
Gallionella	0	0	0	0	2	0
Gardnerella	180	4	45	1	7	0
Gemmatimonas	3	0	27	39	1	1
Geobacillus	85	31	40	83	144	3
Geobacter	7	1	0	26	21	0
Geodermatophilus	57	14	123	241	45	8
Gillisia	1	0	0	2	0	4
Glaciecola	0	0	10	1	4	7
Gloeobacter	0	0	1	4	0	0
Gluconacetobacter	11	0	55	23	6	9
Gluconobacter	0	1	1	3	0	0
Gordonia	60	3	16	41	1	0
Gramella	0	0	0	1	0	1
Granulibacter	4	0	5	7	2	0
Haemophilus	577	2	11	14	107	1
Hahella	0	0	0	0	0	1
Halalkalicoccus	1	0	0	0	0	0
Haliangium	0	1	1	0	0	0
Haliscomenobacter	6	1	0	0	0	1
Haloarcula	1	0	0	0	0	0
Halobacterium	2	0	0	1	0	0
Halobacteroides	0	0	0	0	0	0
Haloferax	1	0	0	0	0	0
Halogeometricum	1	0	0	0	0	0
Halomonas	3	1	3	9	2	7
Haloquadratum	73	6	0	0	0	0
Halorhodospira	1	0	1	2	0	0
Halorubrum	2	0	0	0	0	0
Haloterrigena	3	0	0	0	0	0
Halothermothrix	0	0	0	1	0	0
Halothiobacillus	2	2	0	1	14	1
Heliobacterium	0	0	2	2	4	0
Herbaspirillum	97	8	103	136	7	3
Herminiimonas	49	3	52	40	113	1
Herpetosiphon	3	0	0	8	0	0
Hirschia	0	0	1	0	0	0
Histophilus	1	0	0	0	0	0
Hymenobacter	215	102	31	59	0	0
Hyphomicrobium	27	13	23	48	2	0
Hyphomonas	1	0	8	2	0	0
Idiomarina	1	0	0	0	0	0
Ilyobacter	0	0	0	0	0	1
Inovirus	0	0	0	0	0	1
Intrasporangium	20	4	39	56	6	2
Isoptericola	18	2	23	51	66	3
Isosphaera	1	0	2	8	0	0
Jannaschia	1	0	3	4	1	2
Janthinobacterium	16	4	13	20	1	0
Jonesia	6	1	0	0	0	5
Kangiella	0	0	5	0	0	0
Ketogulonicigenium	5	1	12	10	2	0
Kineococcus	12	7	23	54	3	2
Klebsiella	163	21	1016	350	2473	7
Kocuria	378	110	84	20	12	1
Kribbella	11	2	28	44	0	1
Krokinobacter	1	0	0	0	4	2
Kytococcus	43	10	74	14	69	1
Lacinutrix	3	1	8	3	0	11
Lactobacillus	560	72	13	8	3	6
Lactococcus	488	10	1	2	1	2
Lambda.like.viruses	1	0	76	29	261	5
Laribacter	2	3	0	4	8	0
Lawsonia	0	0	4	0	0	0
Leadbetterella	8	4	1	1	0	0
Legionella	84	82	3	3	0	0
Leifsonia	5	5	9	119	24	3
Leptonema	0	0	0	0	0	0
Leptospira	3	3	0	0	0	0
Leptothrix	40	7	206	70	78	0
Leptotrichia	21	0	1	0	0	0
Leuconostoc	200	33	2	0	0	2
Listeria	5	0	0	0	0	1
Listonella	0	0	0	0	0	0
Lutiella	10	1	13	3	4	0
Lysinibacillus	5	0	2	1	1	2
Macrococcus	7	2	0	0	0	0
Magnetococcus	0	0	0	1	2	0
Magnetospirillum	4	0	11	12	1	0
Mardivirus	1	0	0	0	0	0
Maribacter	2	0	0	0	3	0
Maricaulis	0	0	61	8	0	0
Marinithermus	1	0	1	2	0	0
Marinobacter	7	2	66	13	1	2
Marinomonas	2	1	2	4	40	24
Marivirga	0	0	1	0	0	0
Mastadenovirus	8	38	3	0	2	0
Meiothermus	184	7	5	2	0	0
Melissococcus	0	0	0	1	0	1
Mesoplasma	0	0	1	3	0	260
Mesorhizobium	4672	20	175	319	144	5
Methanobacterium	1	1	0	0	0	0
Methanobrevibacter	6	1	0	0	0	0
Methanococcoides	0	0	234	595	1800	40
Methanomethylovorans	4	1	0	0	2	0
Methanosaeta	0	2	0	0	0	0
Methanosarcina	2	2	0	1	0	0
Methanothermobacter	0	0	0	0	0	2
Methylacidiphilum	0	0	0	0	0	0
Methylibium	1	0	1	0	0	0
Methylobacillus	27	1	6	1	12	0
Methylobacter	1	0	1	0	0	1
Methylobacterium	760	71	792	1429	286	25
Methylocella	11	1	4	9	1	0
Methylococcus	3	0	0	0	0	0
Methylocystis	5	16	48	31	133	9
Methylomonas	0	0	0	0	1	1
Methylosinus	2	1	7	24	0	0
Methylotenera	27	2	0	1	0	0
Methylovorus	1	0	1	1	0	6
Microbacterium	52	9	565	2290	2253	78
Micrococcus	213	15	287	60	133	1
Microcystis	0	0	0	8	0	0
Microlunatus	27	7	52	82	13	0
Micromonospora	4	2	24	57	3	0
Mobiluncus	10	0	1	0	0	0
Molluscipoxvirus	1	0	0	0	0	0
Moraxella	51	1	1	0	0	0
Mucilaginibacter	0	0	3	9	1	0
Muricauda	1	0	0	2	0	1
Mycobacterium	211	48	454	438	163	2
Mycoplasma	9	10	0	0	1	214
Myroides	12	1	1	1	0	0
Myxococcus	10	0	9	51	0	0
NA.	283	46	165	145	103	10
Nakamurella	16	5	25	84	13	1
Natrinema	1	1	0	0	0	0
Natronococcus	0	0	1	0	0	0
Natronomonas	1	0	0	0	0	0
Neisseria	370	4	32	23	112	4
Niabella	3	3	1	5	15	0
Niastella	6	0	1	6	2	1
Nitrobacter	143	6	171	45	59	0
Nitrosococcus	2	1	0	2	0	0
Nitrosomonas	10	6	120	13	4	0
Nitrosopumilus	0	0	37	1	0	0
Nitrosospira	2	1	0	6	0	0
Nitrospira	6	1	0	13	1	0
Nocardia	6	0	21	45	63	0
Nocardioides	54	6	172	436	47	7
Nocardiopsis	4	3	22	16	1	0
Nostoc	28	3	3	7	1	0
Novosphingobium	49	11	533	284	36	2
Oceanithermus	0	0	1	2	0	0
Oceanobacillus	1	0	19	1	4	0
Ochrobactrum	204	4	23	23	9	4
Odoribacter	7	2	3	0	0	0
Oenococcus	4	0	0	0	0	0
Oligotropha	136	7	57	16	29	0
Olsenella	3	0	0	0	0	0
Opitutus	5	0	5	6	0	0
Orientia	2	0	0	0	1	0
Ornithobacterium	1	0	0	0	0	9
P2.like.viruses	0	0	0	0	0	0
P22.like.viruses	0	0	0	0	0	0
Paenibacillus	4	3	16	2	1	0
Paludibacter	2	0	0	1	0	0
Pantoea	202	34	296	1453	73	30
Parabacteroides	27	0	5	0	0	0
Parachlamydia	12	0	0	0	0	0
Paracoccus	127	21	126	236	143	8
Parvibaculum	17	1	43	40	17	0
Parvularcula	1	0	0	1	0	0
Pasteurella	1	0	0	0	0	0
Pectobacterium	51	2	7	19	1	0
Pediococcus	20	3	0	0	0	0
Pedobacter	33	7	2	23	0	0
Pedosphaera	1	0	0	1	0	0
Pelobacter	1	2	4	15	38	4
Pelotomaculum	2	0	0	0	0	0
Peptoniphilus	42	0	1	0	0	0
Petrotoga	0	0	0	1	0	0
Phenylobacterium	21	6	75	94	17	1
Photobacterium	0	0	0	0	0	2
Photorhabdus	3	0	0	1	0	0
Pirellula	1	0	3	31	0	8
Planctomyces	0	0	0	4	0	2
Polaromonas	81	6	55	63	60	3
Polynucleobacter	1	2	0	1	0	0
Polyomavirus	5	0	0	0	0	0
Pontibacter	15	8	17	45	16	3
Porphyromonas	30	0	10	4	0	0
Prevotella	577	14	33	4	0	1
Prochlorococcus	41	3	0	0	2	15
Propionibacterium	5477	710	7986	2273	2953	562
Prosthecochloris	3	0	25	11	0	4
Proteus	4	0	5	0	0	0
Pseudoalteromonas	2	0	8	40	11	67
Pseudomonas	4826	524	6544	46973	29645	1273
Pseudonocardia	10	4	20	54	78	0
Pseudoxanthomonas	130	11	128	312	94	8
Psychrobacter	251	71	36	83	6	11
Psychromonas	0	0	0	0	0	16
Pusillimonas	23	0	6	4	44	0
Pyrolobus	0	0	0	0	0	0
Rahnella	1083	14	6	22	16	4
Ralstonia	74	30	1248	175	1899	158
Ramlibacter	117	15	206	172	235	1
Rhizobium	306	3	90	374	267	2
Rhodanobacter	97	1	39	68	33	2
Rhodobacter	67	18	198	263	33	7
Rhodococcus	404	15	67	152	33	2
Rhodomicrobium	1	1	2	8	0	0
Rhodopirellula	0	0	0	5	0	12
Rhodopseudomonas	1208	20	1163	372	1391	23
Rhodospirillum	53	143	53	128	251	16
Rhodothermus	3	0	0	5	1	0
Rickettsia	3	0	1	1	17	0
Riemerella	14	8	0	20	0	4
Robiginitalea	0	0	0	1	0	0
Roseiflexus	0	1	1	2	0	0
Roseobacter	1	0	3	7	0	4
Rothia	1120	15	206	40	237	1
Rubrivivax	51	19	253	114	95	0
Rubrobacter	6	4	2	9	1	0
Ruegeria	13	4	40	43	4	22
Ruminococcus	4	0	5	0	0	0
Runella	4	0	0	1	0	0
SPO1.like.viruses	2	0	0	0	0	0
Saccharomonospora	16	8	27	43	77	0
Saccharophagus	4	0	1	0	2	14
Saccharopolyspora	5	2	38	30	31	2
Salinibacter	12	0	0	0	0	0
Salinispora	3	1	1	4	3	0
Salmonella	67	9	348	93	1079	4
Sanguibacter	11	2	37	88	19	1
Saprospira	0	0	0	0	0	1
Sebaldella	0	1	0	0	0	0
Segniliparus	0	0	1	3	0	3
Selenomonas	8	0	0	1	0	0
Serratia	2776	116	84	254	139	2
Shewanella	443	15	43	20	51	494
Shigella	16	3	4	7	13	0
Sideroxydans	3	1	1	3	0	0
Simkania	1	0	0	0	0	0
Singulisphaera	7	0	68	128	18	4
Sinorhizobium	254	4	64	196	73	2
Slackia	1	0	0	0	0	0
Sodalis	3	0	0	0	0	0
Solitalea	2	0	0	2	0	1
Sorangium	2	1	2	50	10	3
Sphaerobacter	1	0	2	9	1	0
Sphingobacterium	2	2	0	1	0	0
Sphingobium	104	89	3954	960	168	7
Sphingomonas	117	44	5846	1927	291	17
Sphingopyxis	61	45	1186	422	77	2
Spirochaeta	0	0	0	0	0	0
Spirosoma	91	12	2	17	0	0
Stackebrandtia	2	1	1	2	23	0
Staphylococcus	2648	66	81	12	11	2
Starkeya	42	0	64	106	10	1
Stenotrophomonas	136	9	475	510	1439	12
Stigmatella	1	0	4	45	0	0
Streptobacillus	3	0	0	0	0	0
Streptococcus	2910	70	100	175	212	9
Streptomyces	35	4	317	405	229	4
Streptosporangium	9	0	3	21	32	1
Sulfuricurvum	2	18	9	19	142	6
Sulfurihydrogenibium	0	5	0	0	0	0
Sulfurimonas	1	0	0	0	0	0
Sulfurospirillum	0	0	0	0	0	0
Sulfurovum	0	0	0	0	0	0
Symbiobacterium	0	0	0	4	0	0
Synechococcus	4	1	44	145	28	3697
Synechocystis	0	0	0	1	0	0
Syntrophobacter	1	0	0	0	0	0
Syntrophobotulus	1	0	0	6	0	0
Syntrophus	2	0	0	0	0	0
T4.like.viruses	2	0	0	0	0	33
Taylorella	1	0	0	0	0	0
Tepidanaerobacter	1	0	0	0	0	0
Teredinibacter	2	0	0	0	0	1
Terriglobus	1	0	0	1	5	0
Thauera	29	6	7	63	8	6
Thermaerobacter	21	0	6	9	5	0
Thermincola	0	0	0	1	0	0
Thermoanaerobacter	2	3	0	4	0	0
Thermoanaerobacterium	0	1	0	0	0	0
Thermobacillus	3	0	0	1	0	0
Thermobaculum	1	0	0	2	0	0
Thermobifida	4	0	16	4	0	0
Thermobispora	1	1	26	11	6	0
Thermodesulfobium	0	0	0	0	0	0
Thermomonospora	2	2	2	27	27	0
Thermosynechococcus	0	0	0	1	0	1
Thermotoga	0	0	0	0	0	0
Thermus	57	2	0	3	5	1
Thioalkalimicrobium	1	0	0	2	5	0
Thioalkalivibrio	9	4	15	181	71	8
Thiobacillus	8	1	12	9	0	0
Thiocystis	1	0	0	1	1	0
Thioflavicoccus	2	1	2	4	0	0
Thiomicrospira	0	0	0	0	0	0
Thiomonas	11	1	9	0	4	0
Tolumonas	4	3	2	1	1	0
Treponema	9	0	0	0	0	0
Trichodesmium	0	0	0	8	0	1
Trichormus	2	0	0	2	0	0
Tropheryma	0	0	0	0	0	0
Truepera	1	0	2	15	1	0
Tsukamurella	9	1	7	15	3	0
Ureaplasma	1	0	0	0	0	8
Variovorax	2560	54	410	574	2617	12
Veillonella	86	3	15	0	10	1
Verminephrobacter	47	9	36	14	30	0
Verrucosispora	2	0	19	23	0	0
Vibrio	12	0	21	22	1	82
Victivallis	0	0	0	2	0	1
Waddlia	1	0	0	0	1	1
Weeksella	8	5	0	0	0	0
Weissella	5	0	0	0	0	0
Wolbachia	1	0	4	100	11	2660
Wolinella	1	0	0	0	0	0
Xanthobacter	48	4	110	46	64	1
Xanthomonas	319	14	208	619	156	12
Xenorhabdus	0	0	0	3	0	0
Xylanimonas	10	2	19	25	12	2
Xylella	9	2	57	30	106	0
Yersinia	44	3	1	6	46	1
Zobellia	1	0	3	1	0	0
Zunongwangia	3	1	0	2	0	0
Zymomonas	1	1	19	2	0	0
environmental.samples	2	0	0	0	0	1

## Sheet: FragRecruit_80id_90_Species.xls
	NY_INDOOR	NY_OUTDOOR	SD_IHOSP	SD_OHOSP	SD_IHOUS	SD_SCRPP
Acaryochloris.marina	0	0	0	0	0	1
Acetobacter.pasteurianus	0	1	131	7	0	0
Acetohalobium.arabaticum	0	0	0	0	0	1
Acholeplasma.laidlawii	0	0	0	0	0	0
Achromobacter.xylosoxidans	66	2	74280	8289	1527	38
Acidaminococcus.fermentans	1	0	0	0	0	0
Acidimicrobium.ferrooxidans	0	0	0	2	0	2
Acidiphilium.cryptum	10	1	25	44	1	0
Acidiphilium.multivorum	3	0	10	12	0	0
Acidithiobacillus.ferrivorans	2	2	0	24	0	0
Acidithiobacillus.ferrooxidans	1	0	0	0	0	0
Acidobacterium.capsulatum	1	1	0	5	0	0
Acidobacterium.sp..MP5ACTX8	3	1	0	3	0	0
Acidobacterium.sp..MP5ACTX9	3	0	1	4	0	0
Acidothermus.cellulolyticus	0	0	0	3	0	0
Acidovorax.avenae	35	7	69	76	101	0
Acidovorax.citrulli	65	4	76	94	153	3
Acidovorax.delafieldii	100	21	66	103	156	0
Acidovorax.ebreus	70	8	116	26	286	2
Acidovorax.sp..JS42	241	35	293	397	1034	16
Acinetobacter.baumannii	541	272	57	16	19	7
Acinetobacter.sp..ADP1	83	14	11	4	1	3
Acinetobacter.sp..DR1	199	310	31	9	5	4
Actinobacillus.pleuropneumoniae	2	0	1	0	33	0
Actinobacillus.succinogenes	3	0	0	0	8	0
Actinospica.robiniae	5	2	2	25	8	0
Actinosynnema.mirum	12	1	6	31	7	0
Aequorivita.sublithincola	3	0	0	1	0	2
Aerococcus.urinae	6	2	3	0	0	0
Aeromonas.hydrophila	110	4	43	5	25	0
Aeromonas.salmonicida	16	3	8	2	4	0
Aeromonas.veronii	24	1	30	22	8	1
Afipia.sp..1NLS2	215	2	127	22	17	0
Aggregatibacter.actinomycetemcomitans	4	0	3	0	0	0
Aggregatibacter.aphrophilus	52	0	0	0	2	0
Agrobacterium.sp..H13.3	287	5	24	175	49	1
Agrobacterium.tumefaciens	814	8	105	238	658	1
Agrobacterium.vitis	19	0	1	46	15	0
Agrotis.segetum.nucleopolyhedrovirus	0	0	1	0	0	0
Akkermansia.muciniphila	19	2	12	1	1	5
Albidiferax.ferrireducens	3	0	20	9	2	0
Alcanivorax.borkumensis	0	1	4	0	0	1
Alicycliphilus.denitrificans	66	34	167	130	209	15
Alicyclobacillus.acidocaldarius	0	0	0	2	0	0
Aliivibrio.fischeri	1	0	0	0	1	3
Aliivibrio.salmonicida	0	1	0	0	0	1
Alistipes.finegoldii	8	1	3	0	0	0
Alkalilimnicola.ehrlichii	0	0	1	1	0	0
Alkaliphilus.metalliredigens	0	2	1	0	0	1
Alkaliphilus.oremlandii	0	0	1	0	0	0
Allochromatium.vinosum	2	0	3	1	1	0
Alteromonas.macleodii	5	2	3	2	0	7
Alteromonas.sp..SN2	1	0	164	23	1	35
Amycolatopsis.mediterranei	6	1	23	33	23	0
Amycolicicoccus.subflavus	3	1	1	2	0	0
Anabaena.variabilis	9	1	2	4	0	0
Anaerococcus.prevotii	136	0	3	0	0	0
Anaerolinea.thermophila	0	0	0	3	0	0
Anaeromyxobacter.dehalogenans	4	1	1	22	0	0
Anaeromyxobacter.sp..Fw109.5	2	0	0	18	0	0
Anaeromyxobacter.sp..K	0	1	10	8	0	0
Anguillid.herpesvirus.1	0	0	1	0	0	0
Anoxybacillus.flavithermus	152	1	13	7	0	0
Aquiflexum.balticum	4	1	4	1	0	0
Arcanobacterium.haemolyticum	3	0	0	0	0	0
Arcobacter.butzleri	9	5	1	0	0	0
Arcobacter.nitrofigilis	0	2	0	0	0	1
Aromatoleum.aromaticum	10	0	10	15	1	0
Arthrobacter.arilaitensis	9	46	46	10	1	4
Arthrobacter.aurescens	11	6	7	11	12	0
Arthrobacter.chlorophenolicus	43	7	29	81	17	1
Arthrobacter.phenanthrenivorans	51	17	32	42	13	0
Arthrobacter.sp..FB24	32	2	11	22	5	0
Asticcacaulis.excentricus	2	0	25	8	1	0
Atopobium.parvulum	14	0	5	0	0	0
Azoarcus.sp..BH72	14	1	37	27	16	0
Azorhizobium.caulinodans	25	1	57	32	9	0
Azospirillum.sp..B510	20	3	69	65	11	0
Azotobacter.vinelandii	0	0	0	0	0	0
Bacillus.amyloliquefaciens	50	0	6	0	0	0
Bacillus.anthracis	1	0	0	0	0	0
Bacillus.atrophaeus	2	0	0	0	0	0
Bacillus.cellulosilyticus	2	0	0	0	1	0
Bacillus.cereus	49	10	54	46	254	1
Bacillus.clausii	5	1	0	0	0	0
Bacillus.coagulans	13	20	1	1	1	1
Bacillus.halodurans	2	0	0	0	0	0
Bacillus.licheniformis	26	2	7	1	0	0
Bacillus.megaterium	56	12	8	12	1	0
Bacillus.pseudofirmus	3	0	1	2	0	0
Bacillus.pumilus	5	2	2	1	1	0
Bacillus.sp..1NLA3E	2	2	2	3	0	1
Bacillus.subtilis	41	101	26	51	137	4
Bacillus.thuringiensis	9	1	1	0	11	3
Bacillus.tusciae	0	0	0	1	0	0
Bacillus.weihenstephanensis	14	1	4	0	54	0
Bacteroides.coprosuis	0	1	0	0	0	0
Bacteroides.fragilis	23	2	2	1	0	0
Bacteroides.helcogenes	16	0	1	0	0	0
Bacteroides.salanitronis	15	1	3	1	0	0
Bacteroides.thetaiotaomicron	42	0	7	0	1	0
Bacteroides.vulgatus	324	10	6	1	0	0
Barnesiella.viscericola	9	0	1	1	0	0
Bartonella.bacilliformis	1	0	0	0	0	0
Bartonella.tribocorum	1	0	0	0	1	0
Bdellovibrio.bacteriovorus	2	1	0	2	0	0
Beijerinckia.indica	1	0	0	4	0	0
Belliella.baltica	12	7	4	1	0	0
Beutenbergia.cavernae	9	4	12	28	76	1
Bifidobacterium.adolescentis	78	0	19	16	0	0
Bifidobacterium.animalis	7	0	0	4	0	1
Bifidobacterium.bifidum	9	1	0	1	0	0
Bifidobacterium.dentium	3	0	13	1	0	1
Bifidobacterium.longum	34	2	12	75	12	0
Blattabacterium.sp...Blattella.germanica.	39	0	0	0	0	0
Blattabacterium.sp...Periplaneta.americana.	22	0	0	0	0	0
Bordetella.avium	3	0	208	18	9	0
Bordetella.bronchiseptica	1	0	318	55	7	0
Bordetella.parapertussis	6	0	70	16	13	1
Bordetella.pertussis	6	0	146	35	33	1
Bordetella.petrii	21	2	645	115	98	0
Brachybacterium.faecium	66	10	28	59	17	1
Brachyspira.hyodysenteriae	1	0	0	0	0	0
Bradyrhizobium.japonicum	1565	15	916	274	1784	21
Bradyrhizobium.sp.	728	6	534	141	4420	24
Bradyrhizobium.sp..BTAi1	6	0	2	2	8	0
Bradyrhizobium.sp..ORS.278	180	7	242	94	213	9
Bradyrhizobium.sp..WSM1417	563	12	423	85	641	5
Bradyrhizobium.sp..WSM471	1069	14	600	112	959	10
Brenneria.salicis	33	0	1	7	9	0
Brenneria.sp..EniD312	9	1	2	3	0	0
Brevibacillus.brevis	1	0	2	5	0	0
Brevibacterium.linens	25	4	43	12	7	0
Brevundimonas.subvibrioides	27	8	152	485	149	7
Brucella.abortus	4	0	0	0	0	0
Brucella.canis	21	0	0	4	6	0
Brucella.melitensis	12	0	1	1	0	0
Brucella.microti	2	0	0	0	0	0
Brucella.ovis	50	1	0	11	1	0
Brucella.pinnipedialis	3	0	0	0	0	0
Brucella.suis	6	0	4	2	0	0
Buchnera.aphidicola	6	0	0	0	0	0
Burkholderia.ambifaria	14	5	201	56	140	6
Burkholderia.cenocepacia	14	0	215	52	206	9
Burkholderia.cepacia	0	0	0	0	0	0
Burkholderia.gladioli	11	1	34	44	17	0
Burkholderia.glumae	7	1	30	40	11	0
Burkholderia.graminis	4	0	0	5	18	0
Burkholderia.mallei	3	2	14	7	1	1
Burkholderia.multivorans	18	2	41	12	17	1
Burkholderia.phage.Bcep22	0	0	0	0	0	0
Burkholderia.phage.phi644.2	0	0	0	0	1	0
Burkholderia.phage.phiE125	1	0	0	0	0	0
Burkholderia.phage.phiE255	0	0	0	0	3	0
Burkholderia.phymatum	5	0	10	7	3	1
Burkholderia.phytofirmans	11	0	12	8	10	1
Burkholderia.pseudomallei	5	0	6	4	10	0
Burkholderia.rhizoxinica	0	0	1	2	1	0
Burkholderia.sp.	7	1	491	92	365	5
Burkholderia.sp..383	0	0	0	0	0	0
Burkholderia.sp..CCGE1001	3	0	5	6	2	0
Burkholderia.sp..CCGE1002	12	0	14	5	3	0
Burkholderia.sp..CCGE1003	2	0	6	5	1	0
Burkholderia.sp..Ch1.1	18	2	33	28	99	1
Burkholderia.sp..H160	2	1	29	74	4	3
Burkholderia.sp..JV3	52	9	307	310	1447	8
Burkholderia.thailandensis	7	0	7	3	3	0
Burkholderia.vietnamiensis	18	6	116	38	50	0
Burkholderiales.bacterium.JOSHI_001	36	3	106	60	72	1
Calditerrivibrio.nitroreducens	0	0	0	0	0	0
Calyptogena.magnifica.symbiont	1	0	0	0	0	0
Campylobacter.concisus	8	0	0	0	0	0
Campylobacter.curvus	1	0	0	0	0	0
Campylobacter.hominis	5	0	0	0	0	0
Campylobacter.jejuni	2	1	0	0	0	0
Campylobacter.lari	0	1	0	0	0	0
Candidatus.Accumulibacter.phosphatis	6	3	6	4	8	0
Candidatus.Cloacamonas.acidaminovorans	0	3	0	0	0	0
Candidatus.Hamiltonella.defensa	2	0	0	0	0	0
Candidatus.Koribacter.versatilis	0	0	0	5	0	0
Candidatus.Liberibacter.solanacearum	0	0	0	1	0	0
Candidatus.Nitrospira.defluvii	6	1	0	13	1	0
Candidatus.Pelagibacter.sp..IMCC9063	0	1	0	0	0	0
Candidatus.Pelagibacter.ubique	10	1	0	0	0	1
Candidatus.Phytoplasma.australiense	0	0	0	0	0	1
Candidatus.Protochlamydia.amoebophila	2	2	0	0	0	0
Candidatus.Puniceispirillum.marinum	0	0	0	0	0	4
Candidatus.Solibacter.usitatus	7	0	1	9	1	0
Capnocytophaga.canimorsus	2	0	0	0	0	1
Capnocytophaga.ochracea	21	0	0	0	59	2
Carnobacterium.sp..17.4	19	3	2	0	0	0
Catenulispora.acidiphila	2	1	5	26	1	0
Caulobacter.segnis	25	1	128	79	22	3
Caulobacter.sp..K31	12	3	102	69	17	1
Caulobacter.vibrioides	17	1	54	44	4	0
Cellulomonas.fimi	10	0	28	108	29	8
Cellulomonas.flavigena	17	4	12	65	11	1
Cellulophaga.algicola	2	1	0	0	0	4
Cellulophaga.lytica	0	2	0	2	0	4
Cellvibrio.japonicus	0	0	2	14	1	0
Chelativorans.sp..BNC1	43	3	18	33	7	0
Chitinophaga.pinensis	7	0	4	3	1	0
Chlorobaculum.parvum	0	0	0	0	0	0
Chlorobaculum.tepidum	1	0	0	0	0	0
Chlorobium.limicola	0	0	0	0	0	0
Chlorobium.phaeobacteroides	0	0	0	0	0	0
Chlorobium.phaeovibrioides	2	0	0	0	0	0
Chloroflexus.aurantiacus	0	0	0	0	0	0
Chromobacterium.violaceum	7	0	21	13	4	0
Chromohalobacter.salexigens	4	0	1	11	0	9
Chthoniobacter.flavus	1	0	2	9	0	0
Citrobacter.koseri	33	6	51	4	35	1
Citrobacter.rodentium	16	0	15	10	35	0
Clavibacter.michiganensis	29	4	76	940	267	12
Cloacibacillus.evryensis	1	0	0	0	0	0
Clostridiales.genomosp..BVAB3	15	0	0	1	0	0
Clostridium.acetobutylicum	2	0	0	0	0	0
Clostridium.beijerinckii	5	0	0	0	0	1
Clostridium.botulinum	2	1	0	2	0	3
Clostridium.carboxidivorans	0	0	0	0	0	0
Clostridium.cellulolyticum	13	0	0	0	0	0
Clostridium.difficile	44	2	8	7	1	4
Clostridium.kluyveri	2	1	2	21	4	0
Clostridium.perfringens	18	0	1	0	0	1
Clostridium.phytofermentans	1	0	2	0	0	0
Clostridium.proteoclasticum	1	0	0	0	0	0
Clostridium.saccharolyticum	5	0	1	0	0	0
Clostridium.sp..SY8519	4	4	0	0	0	0
Clostridium.sticklandii	7	3	0	0	0	0
Clostridium.tetani	0	0	0	0	0	3
Clostridium.thermocellum	1	1	0	0	0	0
Collimonas.fungivorans	34	3	66	97	4	1
Colwellia.psychrerythraea	0	0	0	0	0	1
Comamonas.testosteroni	88	29	170	64	107	2
Conexibacter.woesei	11	0	28	65	2	3
Coprothermobacter.proteolyticus	0	0	0	0	0	0
Coraliomargarita.akajimensis	0	0	0	0	0	32
Coriobacterium.glomerans	1	0	48	1	0	0
Corynebacterium.aurimucosum	551	12	153	6	31	4
Corynebacterium.diphtheriae	7	0	1	2	1	0
Corynebacterium.efficiens	36	16	20	9	1	10
Corynebacterium.glutamicum	54	22	1	1	1	0
Corynebacterium.jeikeium	113	3	30	1	30	1
Corynebacterium.kroppenstedtii	172	10	32	1	2	3
Corynebacterium.pseudotuberculosis	3	0	1	0	0	1
Corynebacterium.resistens	40	1	15	3	0	0
Corynebacterium.ulcerans	1	0	0	0	1	0
Corynebacterium.urealyticum	71	1	35	2	5	3
Corynebacterium.variabile	104	8	12	6	11	0
Cotesia.congregata.bracovirus	0	0	0	0	1	0
Coxiella.burnetii	1	0	0	2	0	0
Croceibacter.atlanticus	0	0	0	2	0	0
Crocosphaera.watsonii	0	0	0	1	0	0
Cronobacter.sakazakii	18	1	15	9	3	0
Cronobacter.turicensis	10	0	4	7	0	0
Cryptobacterium.curtum	0	0	0	1	0	0
Cupriavidus.metallidurans	83	262	3540	562	1154	80
Cupriavidus.necator	56	25	140	93	54	3
Cupriavidus.pinatubonensis	0	0	0	0	0	0
Cupriavidus.taiwanensis	27	3	66	25	12	0
Cyanothece.sp..PCC.7425	0	0	0	6	0	0
Cyanothece.sp..PCC.7822	0	0	0	10	0	0
Cyanothece.sp..PCC.8801	0	0	1	1	0	0
Cyclobacterium.marinum	0	0	0	0	0	0
Cytophaga.fermentans	0	0	0	2	0	1
Cytophaga.hutchinsonii	5	3	0	0	0	0
Dechloromonas.aromatica	6	1	9	0	30	1
Dehalococcoides.ethenogenes	0	0	2	0	0	0
Dehalococcoides.sp..BAV1	0	0	0	1	0	0
Dehalococcoides.sp..VS	16	1	13	40	1	2
Deinococcus.deserti	5	3	6	20	3	0
Deinococcus.geothermalis	55	22	0	13	17	0
Deinococcus.hopiensis	32	8	10	21	2	0
Deinococcus.maricopensis	2	0	9	12	0	0
Deinococcus.peraridilitoris	4	0	0	2	1	0
Deinococcus.proteolyticus	14	0	3	4	94	0
Deinococcus.radiodurans	170	39	36	22	1	1
Delftia.acidovorans	84	7	139	216	419	5
Delftia.sp..Cs1.4	20	3	44	52	158	0
Desulfarculus.baarsii	0	0	0	1	0	1
Desulfatibacillum.alkenivorans	0	0	0	0	0	1
Desulfitobacterium.dichloroeliminans	1	0	0	0	0	0
Desulfobacca.acetoxidans	3	0	1	3	1	0
Desulfomicrobium.baculatum	0	0	2	0	0	0
Desulfomonile.tiedjei	0	0	0	1	0	0
Desulfonatronospira.thiodismutans	0	0	0	0	0	0
Desulfosporosinus.youngiae	1	0	0	0	0	0
Desulfotomaculum.acetoxidans	2	0	0	0	0	0
Desulfotomaculum.nigrificans	0	0	0	0	0	0
Desulfovibrio.aespoeensis	0	0	0	1	0	0
Desulfovibrio.desulfuricans	1	1	1	0	0	1
Desulfovibrio.fructosovorans	0	1	2	0	2	0
Desulfovibrio.sp..FW1012B	1	0	0	1	0	0
Desulfovibrio.termitidis	0	0	2	0	0	0
Desulfovibrio.vulgaris	1	0	0	1	0	0
Desulfurispirillum.indicum	1	0	0	0	1	0
Desulfurivibrio.alkaliphilus	0	0	0	0	0	1
Desulfuromonas.acetoxidans	0	0	0	1	0	0
Dethiobacter.alkaliphilus	0	0	0	1	0	0
Dichelobacter.nodosus	1	0	0	0	0	0
Dickeya.dadantii	24	0	1	4	0	0
Dickeya.zeae	10	0	0	1	1	0
Dinoroseobacter.shibae	6	2	9	26	4	1
Dyadobacter.fermentans	20	6	0	18	1	0
Ectothiorhodospira.haloalkaliphila	3	0	0	1	1	2
Edwardsiella.ictaluri	2	0	1	8	67	0
Edwardsiella.tarda	4	0	6	3	0	0
Eggerthella.lenta	1	0	0	1	0	0
Eggerthella.sp..YY7918	0	0	0	0	0	1
Emticicia.oligotrophica	1	1	0	0	0	0
Enterobacter.aerogenes	31	1	37	15	127	1
Enterobacter.asburiae	63	2	38	60	15	3
Enterobacter.cloacae	154	6	338	216	468	5
Enterobacter.sp..638	41	4	96	46	356	3
Enterobacteria.phage.HK022	0	0	63	8	246	1
Enterobacteria.phage.M13	0	0	0	0	0	1
Enterobacteria.phage.RB16	2	0	0	0	0	0
Enterobacteria.phage.YYZ.2008	0	0	0	0	0	0
Enterobacteria.phage.lambda	0	0	13	21	14	3
Enterococcus.faecalis	9	0	0	2	0	0
Enterococcus.faecium	52	12	31	3	43	2
Erwinia.amylovora	8	1	13	3	1	0
Erwinia.billingiae	29	1	19	19	20	1
Erwinia.pyrifoliae	12	0	5	16	1	0
Erwinia.tasmaniensis	10	0	21	22	49	4
Erysipelothrix.rhusiopathiae	2	0	0	0	0	7
Erythrobacter.litoralis	21	18	453	216	17	4
Escherichia.coli	510	1782	3380	5631	15598	1137
Escherichia.fergusonii	5	1	2	1	4	1
Ethanoligenens.harbinense	1	0	0	0	0	0
Eubacterium.eligens	29	2	3	0	0	0
Eubacterium.limosum	1	0	0	0	0	0
Eubacterium.rectale	189	4	13	0	0	0
Exiguobacterium.sibiricum	0	0	0	3	1	0
Exiguobacterium.sp..AT1b	19	4	0	2	0	0
Ferrimonas.balearica	1	0	0	0	0	0
Fervidobacterium.nodosum	0	0	1	1	0	0
Finegoldia.magna	348	9	17	0	0	0
Fischerella.sp..JSC.11	2	0	0	5	0	0
Flavobacteria.bacterium.MS024.3C	5	1	3	1	0	0
Flavobacteriaceae.bacterium.3519.10	69	18	2	29	0	0
Flavobacterium.johnsoniae	92	31	0	4	2	0
Flavobacterium.psychrophilum	13	14	1	0	0	0
Flavobacterium.sp.	1	1	0	0	0	1
Flexibacter.litoralis	1	0	0	0	0	0
Fluviicola.taffensis	0	2	2	2	0	12
Francisella.tularensis	0	0	0	1	0	0
Frankia.alni	7	0	3	3	19	0
Frankia.sp.	2	0	0	9	9	0
Frankia.sp..CN3	5	0	3	9	13	1
Frankia.sp..EUN1f	1	0	6	7	1	0
Frankia.sp..EuI1c	6	0	10	10	2	0
Frankia.symbiont.of.Datisca.glomerata	0	0	8	8	1	1
Fusobacterium.nucleatum	32	0	0	0	0	0
Gallibacterium.anatis	0	0	0	0	0	1
Gallid.herpesvirus.2	1	0	0	0	0	0
Gallionella.capsiferriformans	0	0	0	0	2	0
Gardnerella.vaginalis	180	4	45	1	7	0
Gemmatimonas.aurantiaca	3	0	27	39	1	1
Geobacillus.kaustophilus	7	0	5	4	0	0
Geobacillus.phage.GBSV1	1	0	0	0	0	0
Geobacillus.sp..C56.T2	3	0	0	0	0	0
Geobacillus.sp..C56.T3	13	28	29	51	135	3
Geobacillus.sp..G11MC16	11	1	1	13	9	0
Geobacillus.sp..WCH70	21	2	2	2	0	0
Geobacillus.sp..Y4.1MC1	2	0	1	3	0	0
Geobacillus.sp..Y412MC61	17	0	0	10	0	0
Geobacillus.thermodenitrificans	2	0	1	0	0	0
Geobacillus.thermoglucosidasius	9	0	1	0	0	0
Geobacter.bemidjiensis	2	1	0	1	0	0
Geobacter.metallireducens	0	0	0	0	19	0
Geobacter.sp..FRC.32	1	0	0	0	0	0
Geobacter.sp..M18	2	0	0	22	2	0
Geobacter.sp..M21	1	0	0	0	0	0
Geobacter.uraniireducens	1	0	0	3	0	0
Geodermatophilus.obscurus	57	14	123	241	45	8
Gillisia.limnaea	1	0	0	2	0	4
Glaciecola.sp..4H.3.7.YE.5	0	0	10	1	4	7
Gloeobacter.violaceus	0	0	1	4	0	0
Gluconacetobacter.diazotrophicus	11	0	55	23	6	9
Gluconobacter.oxydans	0	1	1	3	0	0
Gordonia.bronchialis	60	3	16	41	1	0
Gramella.forsetii	0	0	0	1	0	1
Granulibacter.bethesdensis	4	0	5	7	2	0
Haemophilus.ducreyi	0	0	0	0	0	0
Haemophilus.influenzae	50	0	2	7	26	1
Haemophilus.parainfluenzae	525	1	9	6	81	0
Haemophilus.parasuis	2	1	0	1	0	0
Hahella.chejuensis	0	0	0	0	0	1
Halalkalicoccus.jeotgali	1	0	0	0	0	0
Haliangium.ochraceum	0	1	1	0	0	0
Haliscomenobacter.hydrossis	6	1	0	0	0	1
Haloarcula.marismortui	1	0	0	0	0	0
Halobacterium.salinarum	1	0	0	0	0	0
Halobacterium.sp..DL1	1	0	0	1	0	0
Halobacteroides.halobius	0	0	0	0	0	0
Haloferax.volcanii	1	0	0	0	0	0
Halogeometricum.borinquense	1	0	0	0	0	0
Halomonas.elongata	3	1	3	9	2	7
Haloquadratum.walsbyi	73	6	0	0	0	0
Halorhodospira.halophila	1	0	1	2	0	0
Halorubrum.lacusprofundi	2	0	0	0	0	0
Haloterrigena.turkmenica	3	0	0	0	0	0
Halothermothrix.orenii	0	0	0	1	0	0
Halothiobacillus.neapolitanus	2	2	0	1	14	1
Heliobacterium.modesticaldum	0	0	2	2	4	0
Heliothis.virescens.ascovirus.3a	8	0	0	11	0	0
Herbaspirillum.seropedicae	97	8	103	136	7	3
Herminiimonas.arsenicoxydans	49	3	52	40	113	1
Herpetosiphon.aurantiacus	3	0	0	8	0	0
Hirschia.baltica	0	0	1	0	0	0
Histophilus.somni	1	0	0	0	0	0
Human.adenovirus.C	8	38	3	0	2	0
Human.papillomavirus.10	0	1	0	0	0	0
Hymenobacter.roseosalivarius	215	102	31	59	0	0
Hyphomicrobium.denitrificans	21	9	19	22	1	0
Hyphomicrobium.sp..MC1	6	4	4	26	1	0
Hyphomonas.neptunium	1	0	8	2	0	0
Idiomarina.loihiensis	1	0	0	0	0	0
Ilyobacter.polytropus	0	0	0	0	0	1
Intrasporangium.calvum	20	4	39	56	6	2
Isoptericola.variabilis	18	2	23	51	66	3
Isosphaera.pallida	1	0	2	8	0	0
Jannaschia.sp..CCS1	1	0	3	4	1	2
Janthinobacterium.sp..Marseille	16	4	13	20	1	0
Jonesia.denitrificans	6	1	0	0	0	5
Kangiella.koreensis	0	0	5	0	0	0
Ketogulonicigenium.vulgare	5	1	12	10	2	0
Kineococcus.radiotolerans	12	7	23	54	3	2
Klebsiella.pneumoniae	88	19	930	279	2269	4
Klebsiella.variicola	75	2	86	71	204	3
Kocuria.rhizophila	378	110	84	20	12	1
Kribbella.flavida	11	2	28	44	0	1
Krokinobacter.sp..4H.3.7.5	1	0	0	0	4	2
Kytococcus.sedentarius	43	10	74	14	69	1
Lacinutrix.sp..5H.3.7.4	3	1	8	3	0	11
Lactobacillus.acidophilus	20	1	1	0	0	0
Lactobacillus.amylovorus	10	4	0	0	0	0
Lactobacillus.brevis	27	1	0	0	0	0
Lactobacillus.buchneri	19	0	0	1	3	0
Lactobacillus.casei	46	4	4	1	0	0
Lactobacillus.crispatus	120	14	4	1	0	0
Lactobacillus.delbrueckii	28	3	0	0	0	0
Lactobacillus.fermentum	21	2	0	3	0	0
Lactobacillus.gasseri	14	0	1	0	0	0
Lactobacillus.helveticus	12	2	0	1	0	3
Lactobacillus.johnsonii	24	8	0	0	0	0
Lactobacillus.kefiranofaciens	5	0	1	0	0	0
Lactobacillus.phage.A2	0	0	0	1	0	0
Lactobacillus.phage.LP65	1	0	0	0	0	0
Lactobacillus.phage.Lb338.1	1	0	0	0	0	0
Lactobacillus.plantarum	123	14	0	0	0	0
Lactobacillus.reuteri	47	11	1	0	0	3
Lactobacillus.rhamnosus	7	2	0	1	0	0
Lactobacillus.sakei	13	2	1	0	0	0
Lactobacillus.salivarius	24	4	0	0	0	0
Lactococcus.lactis	485	10	1	2	1	2
Lactococcus.phage.936.sensu.lato	3	0	0	0	0	0
Lactococcus.phage.P335.sensu.lato	0	0	0	0	0	1
Lactococcus.phage.TP901.1	0	0	0	0	0	0
Lactococcus.phage.ul36	1	0	0	0	0	0
Laribacter.hongkongensis	2	3	0	4	8	0
Lawsonia.intracellularis	0	0	4	0	0	0
Leadbetterella.byssophila	8	4	1	1	0	0
Legionella.longbeachae	23	22	0	2	0	0
Legionella.pneumophila	61	60	3	1	0	0
Leifsonia.xyli	5	5	9	119	24	3
Leptonema.illini	0	0	0	0	0	0
Leptospira.biflexa	3	3	0	0	0	0
Leptothrix.cholodnii	40	7	206	70	78	0
Leptotrichia.buccalis	18	0	0	0	0	0
Leptotrichia.goodfellowii	3	0	1	0	0	0
Leuconostoc.citreum	53	10	0	0	0	0
Leuconostoc.gasicomitatum	52	3	2	0	0	0
Leuconostoc.kimchii	18	3	0	0	0	0
Leuconostoc.mesenteroides	77	17	0	0	0	2
Listeria.innocua	4	0	0	0	0	0
Listeria.monocytogenes	1	0	0	0	0	0
Listeria.welshimeri	0	0	0	0	0	1
Listonella.anguillarum	0	0	0	0	0	0
Lutiella.nitroferrum	10	1	13	3	4	0
Lymantria.dispar.MNPV	2	0	0	0	0	0
Lysinibacillus.sphaericus	5	0	2	1	1	2
Macrococcus.caseolyticus	7	2	0	0	0	0
Magnetospirillum.magneticum	4	0	11	12	1	0
Mamestra.configurata.NPV.A	20	1	0	0	0	0
Maribacter.sp..HTCC2170	2	0	0	0	3	0
Maricaulis.maris	0	0	61	8	0	0
Marinithermus.hydrothermalis	1	0	1	2	0	0
Marinobacter.hydrocarbonoclasticus	7	2	66	13	1	2
Marinomonas.mediterranea	0	0	0	0	0	9
Marinomonas.posidonica	0	0	1	4	13	11
Marinomonas.sp..MWYL1	2	1	1	0	27	4
Marivirga.tractuosa	0	0	1	0	0	0
Meiothermus.ruber	131	0	5	0	0	0
Meiothermus.silvanus	53	7	0	2	0	0
Melissococcus.plutonius	0	0	0	1	0	1
Merkel.cell.polyomavirus	5	0	0	0	0	0
Mesoplasma.florum	0	0	1	3	0	260
Mesorhizobium.australicum	979	4	61	59	21	1
Mesorhizobium.ciceri	1087	4	32	106	31	4
Mesorhizobium.loti	1388	7	41	82	65	0
Mesorhizobium.opportunistum	1218	5	41	72	27	0
Methanobacterium.sp..AL.21	0	1	0	0	0	0
Methanobacterium.sp..SWAN.1	1	0	0	0	0	0
Methanobrevibacter.smithii	6	1	0	0	0	0
Methanococcoides.burtonii	0	0	234	595	1800	40
Methanomethylovorans.hollandica	4	1	0	0	2	0
Methanosaeta.concilii	0	2	0	0	0	0
Methanosarcina.acetivorans	1	0	0	0	0	0
Methanosarcina.barkeri	1	2	0	1	0	0
Methanothermobacter.thermautotrophicus	0	0	0	0	0	2
Methylacidiphilum.infernorum	0	0	0	0	0	0
Methylibium.petroleiphilum	1	0	1	0	0	0
Methylobacillus.flagellatus	27	1	6	1	12	0
Methylobacter.tundripaludum	1	0	1	0	0	1
Methylobacterium.chloromethanicum	57	5	141	93	4	1
Methylobacterium.extorquens	254	25	215	202	88	4
Methylobacterium.nodulans	55	4	39	124	19	1
Methylobacterium.populi	119	11	113	236	54	2
Methylobacterium.radiotolerans	211	21	233	657	111	15
Methylobacterium.sp..4.46	64	5	51	117	10	2
Methylocella.silvestris	11	1	4	9	1	0
Methylococcus.capsulatus	3	0	0	0	0	0
Methylocystis.sp..ATCC.49242	5	16	48	31	133	9
Methylomonas.methanica	0	0	0	0	1	1
Methylosinus.trichosporium	2	1	7	24	0	0
Methylotenera.mobilis	22	1	0	1	0	0
Methylotenera.versatilis	5	1	0	0	0	0
Methylovorus.glucosotrophus	1	0	1	1	0	5
Methylovorus.sp..MP688	0	0	0	0	0	1
Microbacterium.phage.Min1	0	0	2	0	3	0
Microbacterium.testaceum	52	9	565	2290	2253	78
Micrococcus.luteus	213	15	287	60	133	1
Microcystis.aeruginosa	0	0	0	8	0	0
Microlunatus.phosphovorus	27	7	52	82	13	0
Micromonospora.aurantiaca	2	1	15	46	2	0
Micromonospora.sp..L5	2	1	9	11	1	0
Mobiluncus.curtisii	10	0	1	0	0	0
Molluscum.contagiosum.virus	1	0	0	0	0	0
Moraxella.catarrhalis	51	1	1	0	0	0
Mucilaginibacter.paludis	0	0	3	9	1	0
Muricauda.ruestringensis	1	0	0	2	0	1
Mycobacterium.abscessus	4	1	45	1	0	0
Mycobacterium.avium	23	5	84	44	26	0
Mycobacterium.bovis	2	1	1	1	0	1
Mycobacterium.canettii	2	0	0	1	0	0
Mycobacterium.marinum	1	0	3	4	2	0
Mycobacterium.rhodesiae	29	6	25	70	20	0
Mycobacterium.smegmatis	36	9	67	67	20	1
Mycobacterium.sp..JDM601	4	6	11	9	0	0
Mycobacterium.sp..JLS	27	6	59	52	40	0
Mycobacterium.sp..KMS	12	3	33	27	3	0
Mycobacterium.sp..MCS	1	0	3	2	10	0
Mycobacterium.sp..Spyr1	6	2	12	15	13	0
Mycobacterium.tuberculosis	0	0	0	0	0	0
Mycobacterium.tusciae	14	1	36	51	0	0
Mycobacterium.ulcerans	1	1	1	2	0	0
Mycobacterium.vanbaalenii	25	5	43	34	11	0
Mycoplasma.bovis	0	0	0	0	0	1
Mycoplasma.capricolum	0	0	0	0	0	18
Mycoplasma.fermentans	0	0	0	0	0	1
Mycoplasma.genitalium	8	10	0	0	0	1
Mycoplasma.hyorhinis	0	0	0	0	0	1
Mycoplasma.leachii	0	0	0	0	0	39
Mycoplasma.mobile	0	0	0	0	0	1
Mycoplasma.mycoides	1	0	0	0	0	41
Mycoplasma.penetrans	0	0	0	0	0	0
Mycoplasma.pulmonis	0	0	0	0	0	0
Mycoplasma.putrefaciens	0	0	0	0	1	111
Myroides.odoratus	12	1	1	1	0	0
Myxococcus.fulvus	5	0	6	30	0	0
Myxococcus.xanthus	5	0	3	21	0	0
NA.	84	16	96	168	152	7
Nakamurella.multipartita	16	5	25	84	13	1
Natrinema.pellirubrum	1	1	0	0	0	0
Natronococcus.occultus	0	0	1	0	0	0
Natronomonas.pharaonis	1	0	0	0	0	0
Neisseria.gonorrhoeae	42	0	5	2	9	2
Neisseria.lactamica	73	1	8	7	35	0
Neisseria.meningitidis	255	3	19	14	68	2
Niabella.soli	3	3	1	5	15	0
Niastella.koreensis	6	0	1	6	2	1
Nitrobacter.hamburgensis	112	3	124	30	30	0
Nitrobacter.winogradskyi	31	3	47	15	29	0
Nitrosococcus.halophilus	0	1	0	1	0	0
Nitrosococcus.oceani	0	0	0	0	0	0
Nitrosococcus.watsonii	2	0	0	1	0	0
Nitrosomonas.europaea	3	1	2	1	0	0
Nitrosomonas.eutropha	4	0	117	11	4	0
Nitrosomonas.sp..AL212	3	5	1	1	0	0
Nitrosopumilus.maritimus	0	0	37	1	0	0
Nitrosospira.multiformis	2	1	0	6	0	0
Nocardia.farcinica	6	0	21	45	63	0
Nocardioides.sp.	50	5	161	405	46	6
Nocardioides.sp..JS614	4	1	11	31	1	1
Nocardiopsis.dassonvillei	4	3	22	16	1	0
Nostoc.punctiforme	26	2	2	7	0	0
Nostoc.sp..PCC.7120	2	1	1	0	1	0
Novosphingobium.aromaticivorans	2	1	13	8	0	0
Novosphingobium.sp..PP1Y	47	10	520	276	36	2
Oceanithermus.profundus	0	0	1	2	0	0
Oceanobacillus.iheyensis	1	0	19	1	4	0
Ochrobactrum.anthropi	204	4	23	23	9	4
Odoribacter.splanchnicus	7	2	3	0	0	0
Oenococcus.oeni	4	0	0	0	0	0
Oligotropha.carboxidovorans	136	7	57	16	29	0
Olsenella.uli	3	0	0	0	0	0
Opitutaceae.bacterium.TAV1	2	0	2	4	2	0
Opitutaceae.bacterium.TAV2	1	0	0	0	0	0
Opitutus.terrae	5	0	5	6	0	0
Orgyia.pseudotsugata.MNPV	0	0	0	3	0	0
Orientia.tsutsugamushi	2	0	0	0	1	0
Ornithobacterium.rhinotracheale	1	0	0	0	0	9
Ostreococcus.tauri.virus.1	0	0	0	0	0	3
Ostreococcus.virus.OsV5	0	0	0	0	0	1
Paenibacillus.curdlanolyticus	0	0	0	0	0	0
Paenibacillus.lactis	1	1	0	0	0	0
Paenibacillus.mucilaginosus	0	0	13	1	0	0
Paenibacillus.polymyxa	2	0	0	1	1	0
Paenibacillus.sp..JDR.2	1	2	3	0	0	0
Paenibacillus.sp..Y412MC10	0	0	0	0	0	0
Paludibacter.propionicigenes	2	0	0	1	0	0
Pantoea.ananatis	21	3	13	42	4	1
Pantoea.sp..At.9b	42	3	51	24	9	1
Pantoea.sp..aB	70	17	143	1301	30	23
Pantoea.vagans	69	11	89	86	30	5
Parabacteroides.distasonis	27	0	5	0	0	0
Parachlamydia.acanthamoebae	12	0	0	0	0	0
Paracoccus.denitrificans	127	21	126	236	143	8
Parvibaculum.lavamentivorans	17	1	43	40	17	0
Parvularcula.bermudensis	1	0	0	1	0	0
Pasteurella.multocida	1	0	0	0	0	0
Pectobacterium.atrosepticum	17	0	3	0	0	0
Pectobacterium.carotovorum	24	1	1	9	0	0
Pectobacterium.wasabiae	10	1	3	10	1	0
Pediococcus.pentosaceus	20	3	0	0	0	0
Pedobacter.heparinus	6	0	1	19	0	0
Pedobacter.saltans	27	7	1	4	0	0
Pedosphaera.parvula	1	0	0	1	0	0
Pelobacter.carbinolicus	1	0	0	0	0	0
Pelobacter.propionicus	0	2	4	15	38	4
Pelotomaculum.thermopropionicum	2	0	0	0	0	0
Peptoniphilus.asaccharolyticus	42	0	1	0	0	0
Petrotoga.mobilis	0	0	0	1	0	0
Phenylobacterium.zucineum	21	6	75	94	17	1
Photobacterium.profundum	0	0	0	0	0	2
Photorhabdus.asymbiotica	1	0	0	0	0	0
Photorhabdus.luminescens	2	0	0	1	0	0
Pirellula.staleyi	1	0	3	31	0	8
Planctomyces.brasiliensis	0	0	0	1	0	1
Planctomyces.limnophilus	0	0	0	3	0	1
Plutella.xylostella.multiple.nucleopolyhedrovirus	1	0	0	0	0	0
Polaromonas.naphthalenivorans	0	0	0	0	0	0
Polaromonas.sp..JS666	54	2	36	30	42	1
Polymorphum.gilvum	38	4	33	46	21	2
Polynucleobacter.necessarius	1	2	0	1	0	0
Pontibacter.actiniarum	15	8	17	45	16	3
Porphyromonas.asaccharolytica	17	0	7	4	0	0
Porphyromonas.gingivalis	13	0	3	0	0	0
Prevotella.bivia	47	0	6	1	0	0
Prevotella.dentalis	356	12	5	1	0	0
Prevotella.denticola	23	0	1	0	0	0
Prevotella.melaninogenica	141	2	14	2	0	1
Prevotella.multisaccharivorax	7	0	0	0	0	0
Prevotella.ruminicola	3	0	7	0	0	0
Prochlorococcus.marinus	33	3	0	0	2	6
Prochlorococcus.phage.P.SSM4	0	0	0	0	0	2
Prochlorococcus.sp.	8	0	0	0	0	9
Propionibacterium.acnes	5458	703	7974	2269	2951	561
Propionibacterium.freudenreichii	19	7	12	4	2	1
Propionibacterium.phage.PA6	91	19	16	1	0	0
Prosthecochloris.aestuarii	0	0	0	0	0	0
Prosthecochloris.vibrioformis	3	0	25	11	0	4
Proteus.mirabilis	4	0	5	0	0	0
Pseudaletia.unipuncta.granulovirus	3	1	0	0	0	0
Pseudoalteromonas.atlantica	0	0	2	0	0	4
Pseudoalteromonas.haloplanktis	1	0	6	9	2	29
Pseudoalteromonas.sp..SM9913	1	0	0	31	9	34
Pseudomonas.aeruginosa	497	31	92	260	169	13
Pseudomonas.brassicacearum	87	29	306	2305	1236	65
Pseudomonas.entomophila	45	3	174	333	143	13
Pseudomonas.fluorescens	2191	346	4622	41327	26488	1083
Pseudomonas.fulva	30	4	102	245	97	7
Pseudomonas.mendocina	808	26	360	218	120	12
Pseudomonas.phage.B3	0	0	0	0	0	0
Pseudomonas.phage.LBL3	2	0	0	0	0	0
Pseudomonas.phage.phiCTX	0	0	0	0	0	0
Pseudomonas.putida	519	48	549	1604	813	48
Pseudomonas.savastanoi	11	2	15	108	185	4
Pseudomonas.stutzeri	589	21	249	149	149	14
Pseudomonas.syringae	32	10	21	216	133	12
Pseudomonas.syringae.group.genomosp..3	17	4	54	208	112	2
Pseudonocardia.dioxanivorans	10	4	20	54	78	0
Pseudoxanthomonas.suwonensis	130	11	128	312	94	8
Psychrobacter.cryohalolentis	114	33	14	35	5	3
Psychrobacter.sp.	87	24	9	36	1	8
Psychrobacter.sp..PRwf.1	50	14	13	12	0	0
Psychromonas.ingrahamii	0	0	0	0	0	16
Pusillimonas.sp..T7.7	23	0	6	4	44	0
Pyrolobus.fumarii	0	0	0	0	0	0
Rahnella.aquatilis	473	7	1	5	6	1
Rahnella.sp..Y9602	610	7	5	17	10	3
Ralstonia.phage.RSM1	0	0	0	0	0	0
Ralstonia.pickettii	44	20	1024	112	1630	117
Ralstonia.solanacearum	30	10	224	63	269	41
Ramlibacter.tataouinensis	117	15	206	172	235	1
Rhizobium.etli	86	1	37	131	79	0
Rhizobium.leguminosarum	220	2	53	243	188	2
Rhodanobacter.sp..2APBS1	97	1	39	68	33	2
Rhodobacter.capsulatus	9	1	32	40	7	0
Rhodobacter.sp..SW2	13	2	5	43	4	3
Rhodobacter.sphaeroides	45	15	161	180	22	4
Rhodococcus.equi	11	3	13	49	5	2
Rhodococcus.erythropolis	367	10	23	23	18	0
Rhodococcus.jostii	19	2	10	46	8	0
Rhodococcus.opacus	7	0	21	34	2	0
Rhodomicrobium.vannielii	1	1	2	8	0	0
Rhodopirellula.baltica	0	0	0	5	0	12
Rhodopseudomonas.palustris	1208	20	1163	372	1391	23
Rhodospirillum.centenum	9	0	11	31	1	4
Rhodospirillum.rubrum	44	143	42	97	250	12
Rhodothermus.marinus	3	0	0	5	1	0
Rickettsia.akari	0	0	0	0	5	0
Rickettsia.bellii	2	0	0	0	0	0
Rickettsia.felis	1	0	1	0	2	0
Rickettsia.prowazekii	0	0	0	1	8	0
Rickettsia.rickettsii	0	0	0	0	2	0
Riemerella.anatipestifer	14	8	0	20	0	4
Robiginitalea.biformata	0	0	0	1	0	0
Roseiflexus.castenholzii	0	1	1	2	0	0
Roseobacter.denitrificans	0	0	0	7	0	4
Roseobacter.litoralis	1	0	3	0	0	0
Roseobacter.phage.SIO1	0	0	0	1	0	0
Rothia.dentocariosa	485	3	64	4	28	0
Rothia.mucilaginosa	635	12	142	36	209	1
Rubrivivax.gelatinosus	51	19	253	114	95	0
Rubrobacter.radiotolerans	1	3	0	4	0	0
Rubrobacter.xylanophilus	5	1	2	5	1	0
Ruegeria.pomeroyi	13	4	33	39	3	15
Ruegeria.sp..TM1040	0	0	7	4	1	7
Ruminococcus.albus	2	0	4	0	0	0
Ruminococcus.flavefaciens	2	0	1	0	0	0
Runella.slithyformis	4	0	0	1	0	0
Saccharomonospora.azurea	5	1	1	15	32	0
Saccharomonospora.cyanea	5	2	3	19	33	0
Saccharomonospora.marina	3	3	14	4	11	0
Saccharomonospora.viridis	3	2	9	5	1	0
Saccharophagus.degradans	4	0	1	0	2	14
Saccharopolyspora.erythraea	5	2	38	30	31	2
Salinibacter.ruber	12	0	0	0	0	0
Salinispora.arenicola	2	1	1	0	3	0
Salinispora.tropica	1	0	0	4	0	0
Salmonella.bongori	7	0	0	1	0	0
Salmonella.enterica	60	9	348	92	1079	4
Salmonella.phage.HK620	0	0	0	0	0	0
Salmonella.phage.epsilon15	2	0	0	0	0	0
Sanguibacter.keddieii	11	2	37	88	19	1
Saprospira.grandis	0	0	0	0	0	1
Sebaldella.termitidis	0	1	0	0	0	0
Segniliparus.rotundus	0	0	1	3	0	3
Selenomonas.sputigena	8	0	0	1	0	0
Serratia.proteamaculans	1721	76	56	86	93	0
Serratia.sp..AS12	252	7	11	130	15	1
Serratia.sp..S4	803	33	17	38	31	1
Shewanella.amazonensis	3	0	0	0	0	0
Shewanella.baltica	285	5	0	0	0	7
Shewanella.denitrificans	0	0	0	0	0	1
Shewanella.frigidimarina	3	1	0	0	0	2
Shewanella.halifaxensis	0	0	0	0	0	0
Shewanella.oneidensis	23	1	3	1	13	449
Shewanella.pealeana	0	0	0	0	11	0
Shewanella.putrefaciens	7	2	0	2	0	5
Shewanella.sediminis	0	0	0	0	0	0
Shewanella.sp.	101	6	40	15	25	27
Shewanella.sp..ANA.3	2	0	0	0	0	0
Shewanella.sp..MR.4	14	0	0	0	0	1
Shewanella.sp..MR.7	0	0	0	0	0	0
Shewanella.violacea	0	0	0	0	0	1
Shewanella.woodyi	0	0	0	0	1	0
Shigella.boydii	6	0	1	1	3	0
Shigella.dysenteriae	3	1	0	0	0	0
Shigella.flexneri	4	0	2	6	7	0
Shigella.sonnei	3	2	1	0	3	0
Sideroxydans.lithotrophicus	3	1	1	3	0	0
Simian.virus.40	0	0	0	0	0	0
Simkania.negevensis	1	0	0	0	0	0
Singulisphaera.acidiphila	7	0	68	128	18	4
Sinorhizobium.fredii	100	2	31	83	14	0
Sinorhizobium.medicae	56	1	7	48	19	0
Sinorhizobium.meliloti	98	1	26	65	40	2
Slackia.heliotrinireducens	1	0	0	0	0	0
Sodalis.glossinidius	3	0	0	0	0	0
Solitalea.canadensis	2	0	0	2	0	1
Sorangium.cellulosum	2	1	2	50	10	3
Sphaerobacter.thermophilus	1	0	2	9	1	0
Sphingobacterium.sp..21	2	2	0	1	0	0
Sphingobium.chlorophenolicum	25	28	1194	318	46	2
Sphingobium.japonicum	79	61	2760	642	122	5
Sphingomonas.wittichii	117	44	5846	1927	291	17
Sphingopyxis.alaskensis	61	45	1186	422	77	2
Spirochaeta.caldaria	0	0	0	0	0	0
Spirochaeta.sp..Buddy	0	0	0	0	0	0
Spirosoma.linguale	91	12	2	17	0	0
Spodoptera.exigua.MNPV	4	0	0	0	0	0
Staphylococcus.aureus	352	10	19	2	0	0
Staphylococcus.carnosus	36	0	1	0	1	0
Staphylococcus.epidermidis	1157	29	19	3	7	1
Staphylococcus.haemolyticus	721	11	28	1	0	0
Staphylococcus.lugdunensis	87	3	3	3	0	0
Staphylococcus.phage.80alpha	1	0	0	0	0	0
Staphylococcus.phage.CNPH82	1	0	0	0	0	0
Staphylococcus.phage.K	1	0	0	0	0	0
Staphylococcus.phage.PH15	1	0	0	0	0	0
Staphylococcus.pseudintermedius	10	1	5	0	0	0
Staphylococcus.saprophyticus	283	12	6	3	3	1
Starkeya.novella	42	0	64	106	10	1
Stenotrophomonas.maltophilia	136	9	475	510	1439	12
Stenotrophomonas.phage.S1	0	0	0	0	2	0
Stenotrophomonas.phage.phiSMA9	0	0	0	0	0	0
Stigmatella.aurantiaca	1	0	4	45	0	0
Streptobacillus.moniliformis	3	0	0	0	0	0
Streptococcus.agalactiae	13	0	0	0	2	1
Streptococcus.dysgalactiae	2	0	0	0	0	0
Streptococcus.equi	10	1	0	0	1	0
Streptococcus.gallolyticus	26	9	0	0	0	0
Streptococcus.gordonii	118	6	5	31	11	0
Streptococcus.mitis	298	4	12	12	8	0
Streptococcus.mutans	11	1	1	0	0	0
Streptococcus.oralis	260	0	10	90	30	0
Streptococcus.parasanguinis	397	7	8	1	68	1
Streptococcus.parauberis	3	2	0	0	0	0
Streptococcus.pasteurianus	6	1	0	0	0	0
Streptococcus.phage.7201	2	0	0	0	0	0
Streptococcus.phage.ALQ13.2	1	0	0	0	0	0
Streptococcus.phage.Abc2	2	0	0	0	0	0
Streptococcus.phage.DT1	1	0	0	0	0	0
Streptococcus.phage.PH10	1	0	0	0	0	0
Streptococcus.phage.SM1	1	0	0	0	0	0
Streptococcus.pneumoniae	611	8	29	20	33	0
Streptococcus.pseudopneumoniae	142	3	11	0	15	0
Streptococcus.pyogenes	8	0	0	0	0	0
Streptococcus.salivarius	110	6	0	7	21	0
Streptococcus.sanguinis	256	3	20	11	4	3
Streptococcus.suis	44	8	0	0	12	1
Streptococcus.thermophilus	591	10	3	2	7	3
Streptococcus.uberis	2	1	0	1	0	0
Streptomyces.avermitilis	7	1	55	42	45	0
Streptomyces.coelicolor	4	1	62	59	60	1
Streptomyces.flavogriseus	2	1	67	143	12	1
Streptomyces.griseus	4	0	44	44	56	1
Streptomyces.scabiei	4	1	9	40	11	1
Streptomyces.sp..SA3_actF	1	0	1	3	2	0
Streptomyces.sp..SA3_actG	2	0	5	15	13	0
Streptomyces.sp..SirexAA.E	6	0	38	36	10	0
Streptomyces.violaceusniger	5	0	36	23	20	0
Streptosporangium.roseum	9	0	3	21	32	1
Stx2.converting.phage.86	0	0	0	0	0	1
Sulfuricurvum.kujiense	2	18	9	19	142	6
Sulfurihydrogenibium.azorense	0	5	0	0	0	0
Sulfurimonas.denitrificans	1	0	0	0	0	0
Sulfurospirillum.deleyianum	0	0	0	0	0	0
Sulfurovum.sp..NBC37.1	0	0	0	0	0	0
Symbiobacterium.thermophilum	0	0	0	4	0	0
Synechococcus.elongatus	0	0	0	1	0	0
Synechococcus.phage.S.PM2	0	0	0	0	0	1
Synechococcus.phage.S.RSM4	0	0	0	0	0	12
Synechococcus.phage.syn9	0	0	0	0	0	18
Synechococcus.sp.	2	0	10	72	8	1002
Synechococcus.sp..CC9311	0	0	14	44	14	2033
Synechococcus.sp..JA.2.3B.a.2.13.	0	0	0	1	0	0
Synechococcus.sp..JA.3.3Ab	0	0	0	7	0	0
Synechococcus.sp..PCC.7002	0	0	1	0	0	0
Synechococcus.sp..RCC307	2	0	0	0	0	1
Synechococcus.sp..WH.7803	0	0	0	1	0	3
Synechococcus.sp..WH.8016	0	1	19	17	6	654
Synechococcus.sp..WH.8102	0	0	0	2	0	4
Synechocystis.sp..PCC.6803	0	0	0	1	0	0
Syntrophobacter.fumaroxidans	1	0	0	0	0	0
Syntrophobotulus.glycolicus	1	0	0	6	0	0
Syntrophus.aciditrophicus	2	0	0	0	0	0
Taylorella.equigenitalis	1	0	0	0	0	0
Tepidanaerobacter.sp..Re1	1	0	0	0	0	0
Teredinibacter.turnerae	2	0	0	0	0	1
Terriglobus.saanensis	1	0	0	1	5	0
Thauera.sp..MZ1T	29	6	7	63	8	6
Thermaerobacter.marianensis	1	0	0	7	0	0
Thermaerobacter.subterraneus	20	0	6	2	5	0
Thermincola.potens	0	0	0	1	0	0
Thermoanaerobacter.italicus	0	0	0	0	0	0
Thermoanaerobacter.sp..X514	2	2	0	4	0	0
Thermoanaerobacter.sp..X561	0	1	0	0	0	0
Thermoanaerobacterium.thermosaccharolyticum	0	1	0	0	0	0
Thermobacillus.composti	3	0	0	1	0	0
Thermobaculum.terrenum	1	0	0	2	0	0
Thermobifida.fusca	4	0	16	4	0	0
Thermobispora.bispora	1	1	26	11	6	0
Thermodesulfobium.narugense	0	0	0	0	0	0
Thermomonospora.curvata	2	2	2	27	27	0
Thermosynechococcus.elongatus	0	0	0	1	0	1
Thermotoga.petrophila	0	0	0	0	0	0
Thermus.aquaticus	9	0	0	0	1	0
Thermus.scotoductus	47	2	0	3	4	0
Thermus.thermophilus	1	0	0	0	0	1
Thioalkalimicrobium.aerophilum	1	0	0	0	2	0
Thioalkalimicrobium.cyclicum	0	0	0	2	3	0
Thioalkalivibrio.sp..K90mix	0	1	6	3	0	3
Thioalkalivibrio.sulfidophilus	7	2	7	176	71	2
Thioalkalivibrio.thiocyanoxidans	2	1	2	2	0	3
Thiobacillus.denitrificans	8	1	12	9	0	0
Thiocystis.violascens	1	0	0	1	1	0
Thioflavicoccus.mobilis	2	1	2	4	0	0
Thiomicrospira.crunogena	0	0	0	0	0	0
Thiomonas.intermedia	11	1	9	0	4	0
Tolumonas.auensis	4	3	2	1	1	0
Treponema.denticola	4	0	0	0	0	0
Treponema.succinifaciens	5	0	0	0	0	0
Trichodesmium.erythraeum	0	0	0	8	0	1
Trichoplusia.ni.ascovirus.2c	8	0	0	0	0	0
Trichormus.azollae	2	0	0	2	0	0
Tropheryma.whipplei	0	0	0	0	0	0
Truepera.radiovictrix	1	0	2	15	1	0
Tsukamurella.paurometabola	9	1	7	15	3	0
Ureaplasma.parvum	1	0	0	0	0	6
Ureaplasma.urealyticum	0	0	0	0	0	2
Variovorax.paradoxus	2560	54	410	574	2617	12
Veillonella.parvula	86	3	15	0	10	1
Verminephrobacter.eiseniae	47	9	36	14	30	0
Verrucosispora.maris	2	0	19	23	0	0
Vibrio.cholerae	9	0	0	0	1	0
Vibrio.harveyi	0	0	8	10	0	2
Vibrio.parahaemolyticus	2	0	0	0	0	1
Vibrio.sp..Ex25	0	0	0	0	0	10
Vibrio.splendidus	0	0	13	10	0	67
Vibrio.vulnificus	1	0	0	2	0	2
Victivallis.vadensis	0	0	0	2	0	1
Waddlia.chondrophila	1	0	0	0	1	1
Weeksella.virosa	8	5	0	0	0	0
Weissella.koreensis	5	0	0	0	0	0
Wolbachia.endosymbiont.of.Brugia.malayi	0	0	0	0	0	1
Wolbachia.endosymbiont.of.Culex.quinquefasciatus	1	0	0	2	1	113
Wolbachia.endosymbiont.of.Drosophila.melanogaster	0	0	0	23	4	821
Wolbachia.sp..wRi	0	0	4	75	6	1725
Wolinella.succinogenes	1	0	0	0	0	0
Xanthobacter.autotrophicus	48	4	110	46	64	1
Xanthomonas.albilineans	16	1	7	87	17	0
Xanthomonas.axonopodis	12	1	46	104	20	2
Xanthomonas.campestris	259	8	69	147	9	3
Xanthomonas.euvesicatoria	17	3	42	123	105	3
Xanthomonas.oryzae	15	1	44	158	5	4
Xenorhabdus.bovienii	0	0	0	2	0	0
Xenorhabdus.nematophila	0	0	0	1	0	0
Xestia.c.nigrum.granulovirus	2	0	0	0	0	0
Xylanimonas.cellulosilytica	10	2	19	25	12	2
Xylella.fastidiosa	9	2	57	30	106	0
Yersinia.enterocolitica	23	0	0	1	4	0
Yersinia.pestis	7	2	1	0	0	0
Yersinia.pseudotuberculosis	14	1	0	5	42	1
Zobellia.galactanivorans	1	0	3	1	0	0
Zunongwangia.profunda	3	1	0	2	0	0
Zymomonas.mobilis	1	1	19	2	0	0
X.Cellvibrio..gilvus	18	3	9	31	21	1
gamma.proteobacterium.HdN1	2	1	0	0	0	0
halophilic.archaeon.DL31	2	0	0	0	0	0
halophilic.archaeon.True.ADL	2	0	0	0	0	0
uncultured.Termite.group.1.bacterium	0	0	0	0	0	1
uncultured.methanogenic.archaeon.RC.I	2	0	0	0	0	0
